# Supplementary material
Source: ML conference proceedings conference paper supplement (https://openreview.net/forum?id=WN1TaGjVC9U)
Supplement: supplementary_material [file attachment]

## Checklist

1. For all authors...
  - (a) Do the main claims made in the abstract and introduction accurately reflect the paper’s contributions and scope? [Yes]
  - (b) Did you describe the limitations of your work? [Yes] Discussed throughout, but see Section 7 for an example.
  - (c) Did you discuss any potential negative societal impacts of your work? [Yes] We included a broader impact statement, Section A
  - (d) Have you read the ethics review guidelines and ensured that your paper conforms to them? [Yes]
2. If you are including theoretical results...
  - (a) Did you state the full set of assumptions of all theoretical results? [Yes] Sections C,H
  - (b) Did you include complete proofs of all theoretical results? [Yes] Sections C,H
3. If you ran experiments...
  - (a) Did you include the code, data, and instructions needed to reproduce the main experimental results (either in the supplemental material or as a URL)? [Yes] Code and documentation are available at <https://github.com/debbiemarkslab/BEAR>.
  - (b) Did you specify all the training details (e.g., data splits, hyperparameters, how they were chosen)? [Yes] Section L
  - (c) Did you report error bars (e.g., with respect to the random seed after running experiments multiple times)? [Yes] Simulation experiments (Figure 2, Section I) show variability across datasets. One random seed was used for training (Section L.2). As a measure of uncertainty, Bayes factors are provided throughout, or can be easily computed (Section L.3) from perplexity (Table I) and dataset size (Table S1).
  - (d) Did you include the total amount of compute and the type of resources used (e.g., type of GPUs, internal cluster, or cloud provider)? [Yes] Section L.2 details hardware, and Figure S13 gives (for an example dataset) the amount of wall time required.
4. If you are using existing assets (e.g., code, data, models) or curating/releasing new assets...
  - (a) If your work uses existing assets, did you cite the creators? [Yes] Yes, throughout; see for instance Section 2 (code, in particular KMC) and Section K (datasets).
  - (b) Did you mention the license of the assets? [Yes] The licenses for the main code assets are described in Section J.3, and dataset availability is described in Section K
  - (c) Did you include any new assets either in the supplemental material or as a URL? [Yes] Code is available at <https://github.com/debbiemarkslab/BEAR>.
  - (d) Did you discuss whether and how consent was obtained from people whose data you’re using/curating? [Yes] Section K
  - (e) Did you discuss whether the data you are using/curating contains personally identifiable information or offensive content? [Yes] Section K
5. If you used crowdsourcing or conducted research with human subjects...
  - (a) Did you include the full text of instructions given to participants and screenshots, if applicable? [N/A]
  - (b) Did you describe any potential participant risks, with links to Institutional Review Board (IRB) approvals, if applicable? [N/A]
  - (c) Did you include the estimated hourly wage paid to participants and the total amount spent on participant compensation? [N/A]

## A Broader impact statement

The social impact and bioethics of genetics is a complex and well-studied subject. Here, we briefly highlight some of the ways the methods presented in this article intersect with major issues. Health: statistical genetics methods have been crucial in diagnosing disease and dissecting its mechanisms, and we hope that the methods presented here will further this research. On the other hand, a detailed understanding of personal genetic information can be used as the basis for discrimination. Technology: as generative models, BEAR models may be useful in designing new sequences such as therapeutics. Genetic engineering, however, is a dual-use technology. Culture: popular understanding of genetics is often bound up in the idea that genomes are relatively fixed and change only very slowly over time, which feeds into concerns over the "naturalness" of genetic modification and beliefs about the static nature of race and ethnicity. These public perceptions are likely partially a consequence of scientific models and methods that often simply ignore complex genetic variation and analyze individual genomic data by comparing it to "reference" individuals. BEAR models contribute theoretical and statistical methods for working with complex variants without relying on references.

## B Overview of supplementary material

Sections [C-H](#) are our theoretical results. Section [I](#) describes our simulation experiments. Section [J](#) details how we implemented scalable inference for BEAR models. Sections [K-O](#) provide details on our empirical results based on real data. The Datasets.xlsx file contains information on all the datasets, including links or accession numbers for public databases. Code and documentation are available at <https://github.com/debbiemarkslab/BEAR>.

## C Theory Introduction

BEAR models can be used to address a variety of different estimation and testing problems, and the theoretical questions that arise in each case are related but distinct. One crucial, high-level distinction is between the "finite-lag case" (where we assume the model lag  $L$  is finite) and the "infinite-lag case" (where we allow the model lag  $L$  to approach infinity). In addressing nonparametric density estimation, it is crucial to consider the infinite lag case, since it is likely in practice that the true distribution can only be matched in the infinite  $L$  limit. On the other hand, when it comes to diagnosing misspecification or constructing hypothesis tests, the finite lag case is more acceptable since it is likely in practice that any differences between the model and the data, or between two datasets, will be reflected in finite marginals of the data distribution. The finite lag case is complicated by the fact that it is likely that many kmer-to-base transitions have extremely low probability in practice; even on massive datasets, we observe many transitions with no counts whatsoever. To deal with this case, we develop theoretical tools to accommodate the possibility that some transitions truly have probability zero under the data generating distribution.

An essential and innovative aspect of our formalism is the focus on "subexponential" sequence distributions that obey an exponential moment bound on their length. Our choice to consider sequence distributions that have no upper bound on the lengths of sequences they produce separates our theory from the theory of distributions on finite sets. On the other hand, moment bound assumptions separate our theory from the theory of distributions on countable sets.

The theory will be organized as follows. Section [D](#) describes basic theoretical properties finite-lag Markov sequence models, including their expressiveness and subexponentiality. Subexponential sequence models will be introduced in general here. Section [E](#) demonstrates consistency of inference with a fixed lag and in model selection between lags. A connection is established between effective model dimensions and topologies of de Bruijn graphs. Section [F](#) describes the behavior of the model when inference proceeds by empirical Bayes. The parameter  $h$  is established as a descriptor of misspecification. Section [G](#) describes theoretical guarantees on the behavior of goodness-of-fit and two-sample tests. Finally, section [H](#) demonstrates consistency in the infinite lag case. Later sections depend on definitions and

results established in previous sections with the exception that section [H](#) may be read immediately after reading the definitions at the top of section [E](#).

### C.1 Notation

We consider an alphabet  $\mathcal{B}$  with more than one letter. Define  $\tilde{\mathcal{B}} = \mathcal{B} \cup \{\$$  where  $\$$  is interpreted as the stop symbol, i.e.  $\$$  may only appear as the last letter of a sequence. Also define the set of strings of the alphabet  $\mathcal{B}$  of length  $L$  that start with any number (including 0) of repeated  $\emptyset$  symbols,  $\mathcal{B}_L^\emptyset$ . For a sequence  $X$  of letters in  $\mathcal{B}$ , possibly terminated by  $\$$ , we define  $|X|$  as its length, including the stop symbol  $\$$  but not any start symbols  $\emptyset$ . For two strings  $X, X'$  define  $\#X'(X)$  the number of occurrences of  $X'$  as a substring in  $X$  and, if  $X$  is not terminated by  $\$$ , define  $(X, X')$  as the concatenated string. We also define the substring from index  $i$  to  $j$  (inclusive) of  $X$  as  $X_{i:j}$ .

Define the set  $S$  of all finite sequences terminated by a stop symbol and give it the discrete topology. Note that  $S$  is countable. Say  $p$  is a distribution of  $S$ . We will use  $\mathbb{E}_p$ , or  $\mathbb{E}$  if there is an unambiguous data-generating distribution, to denote taking an expectation; for example,  $\mathbb{E}_p \#X'$  is the expected number of occurrences of the substring  $X'$  in sequences drawn from  $p$ . For a sequence  $Y$  possibly not terminated by a stop symbol, we define  $p(Y \dots) = p(\{X \in S \mid X_i = Y_i \ \forall i \leq |Y|\})$ . We also define subexponential moment bounds, an assumption we will make great use of:

**Definition 1** (Subexponential sequence distributions). We say a distribution  $p$  on  $S$  is subexponential if for a  $t > 0$ ,  $\mathbb{E}_p \exp(t|X|) < \infty$ .

For a random variable  $Z$  on a probability space with probability  $P$ , and a measurable set  $A$  in the sample space, we define

$$\mathbb{E}[Z; A] = \mathbb{E}[Z \mathbb{1}_A] = \mathbb{E}[Z|A]P(A)$$

where  $\mathbb{1}_A$  is the random variable with  $\mathbb{1}_A = 1$  on  $A$  and  $\mathbb{1}_A = 0$  outside of  $A$ . As well, for two real sequences  $(a_n)_{n \in \mathbb{N}}, (b_n)_{n \in \mathbb{N}}$ , both possibly undefined for small  $n$ , we write  $a_n \lesssim b_n$  to mean that there is a positive constant  $C$  such that eventually  $a_n \leq Cb_n$ . We write  $a_n \sim b_n$  when  $a_n \lesssim b_n$  and  $a_n \gtrsim b_n$ . We define  $a \wedge b$  as the minimum of  $a$  and  $b$ , and  $a \vee b$  as the maximum.

## D Finite-lag Markov models

In this section we define finite-lag Markov models, and then study the expressiveness of the model class. After defining finite-lag Markov models, this section will concern itself with the expressiveness of the model class. We first show that while there are sequence distributions over  $S$  that are not finite-lag Markov models, the set of finite-lag Markov models is nevertheless dense in the space of distributions over  $S$ . We then show that finite-lag Markov models are subexponential.

The class of finite-lag Markov models is defined to be

Parameters: lag  $L$ , transition probabilities  $\{v_{k,b}\}_{k \in \mathcal{B}_L^\emptyset, b \in \tilde{\mathcal{B}}}$

$$X_i = \emptyset \text{ for } i \leq 0$$

$$X_{i+1} \sim \text{Categorical}(\{v_{X_{i-L+1:i},b}\}_{b \in \tilde{\mathcal{B}}})$$

stopping generation when a  $\$$  symbol is drawn and with parameters picked so that  $|X| < \infty$  a.s.. These models are equivalent to Markov processes on the set  $\mathcal{B}_L^\emptyset \cup \{(X, \$) \mid X \in \mathcal{B}_{L-1}^\emptyset\}$ . The requirement that generated sequences be finite length a.s. is equivalent to the requirement that for every  $k \in \mathcal{B}_L^\emptyset$  that is Markov-accessible, there is another  $k' \in \mathcal{B}_L^\emptyset$  that is Markov-accessible from  $k$  such that  $v_{k',\$} > 0$ . Call  $p_v$  a probability distribution generated this way with parameters  $L, v$ . Call the set of such probability distributions with lag  $L$   $\mathcal{M}_L$ . Define the set of all finite lag Markov models  $\mathcal{M} := \cup_{L=1}^\infty \mathcal{M}_L$  and note  $\mathcal{M}_1 \subset \mathcal{M}_2 \subset \dots$ . Defining  $\Delta_{\tilde{\mathcal{B}}}$  as the  $|\tilde{\mathcal{B}}| - 1$ -dimensional simplex with coordinates indexed by  $\tilde{\mathcal{B}}$ ,  $\mathcal{M}_L$  is parametrized by transition probabilities in  $\Delta_{\tilde{\mathcal{B}}}^{\mathcal{B}_L^\emptyset}$ . This parametrization is not defined everywhere on the boundary and is not injective as if an  $L$ -mer  $k$  is not Markov-accessible by a distribution

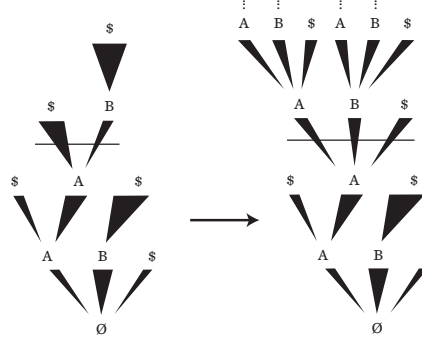

Figure S1: Example application of this construction to the distribution on the left. Transition probabilities for kmers smaller than  $L = 2$  are those defined by the original distribution, while those for larger kmers are all  $1/3$ . The thickness of each line denotes the probability of the transition.

$p_v$ , the vector of probabilities  $v_k$  does not affect  $p_v$ 's distribution. This parametrization is continuous in the sense of the topology described by proposition 2.

We first give some examples of simple sequence distributions that are not finite-lag Markov.

**Proposition 1.** *Not all possible distributions over  $S$  are in  $\mathcal{M}$ .*

*Proof.* Let  $A \in \mathcal{B}$  and  $p^*$  be a distribution over finite sequences that puts probability  $a_i$  on the sequence  $A \times i := A \dots A$  of length  $i$  with  $\sum_{i=0}^{\infty} a_i = 1$ . Assume  $p^* \in \mathcal{M}_L$  with transition probabilities  $\{v_{k,b}\}_{k \in \mathcal{B}_L^o, b \in \tilde{\mathcal{B}}}$ .

For  $i \leq L$ , define  $v_i := v_{(\emptyset \times (L-i), A \times i)}$ , i.e. the vector of transition probabilities from the  $L$ -mer that is  $L-i$   $\emptyset$  symbols followed by  $i$   $A$  symbols. For  $i \geq L$  call  $v_i := v_L$ .

Notice that for any  $i$ , the  $\$$ -component of the vector  $v_i$  is  $p^*(|X| = i \mid |X| \geq i) = \frac{a_i}{S_i}$  where  $S_i := \sum_{j=i}^{\infty} a_j$ . Thus the  $A$ -component is  $1 - \frac{a_i}{S_i} = \frac{S_{i+1}}{S_i}$ . By the definition of the sequence  $(v_i)_{i=1}^{\infty}$ , it is constant for  $i \geq L$ . Call  $\alpha := S_{L+1}/S_L = v_{L,A} = v_{i,A} = S_{i+1}/S_i$  for all  $i \geq L$ . Thus for all  $i > L$ ,  $a_i = S_i v_{i,\$} = \alpha^{i-L} S_L v_{L,\$} = \alpha^{i-L} a_L$ . Thus the sequence  $a_i$  eventually decays exponentially and, as examples, it is impossible that  $a_i \sim 1/i!$  or  $a_i \sim 1/i^2$ .  $\square$

Next we show that  $\mathcal{M}$  is dense in the set of probability distributions on  $S$ . To speak of density, we review the topology and types of convergence on the set of distributions of  $S$  in this next proposition.

**Proposition 2.** *The topology of convergence in total variation, convergence in distribution, and pointwise convergence of the probability of each  $X \in S$  are identical.*

*Proof.* Pointwise convergence of the probability of each  $X \in S$  implies convergence in total variation by Scheffé's lemma. It is also known that the topology induced by the total variation metric is stronger than the topology of convergence in distribution. Finally, since for each  $X \in S$ , the set  $\{X\}$  is open and closed, so that the Portmanteau lemma shows that convergence in distribution implies pointwise convergence.  $\square$

**Lemma 3.** *Say  $p$  is a distribution on  $S$ . There is a lag  $L$  Markov model,  $p_L$ , such that for all  $X \in S$ , if  $|X| \leq L$ ,  $p_L(X) = p(X)$ , and if  $|X| > L$ ,  $p_L(X) = p(X_{1:L})|\tilde{\mathcal{B}}|^{-(|X|-L)}$ .*

*Proof.* For all  $k \in \mathcal{B}_L^o, b \in \tilde{\mathcal{B}}$ , if there is a start symbol  $\emptyset$  in  $k$ , define  $v_{k,b} = \frac{p((k,b)\dots)}{p(k\dots)}$ , otherwise, define  $v_{k,b} = |\tilde{\mathcal{B}}|^{-1}$ . It is clear  $p_v$  satisfies the properties of  $p_L$  (Fig S1).  $\square$

**Corollary 4.**  *$\mathcal{M}$  is dense in the set of distributions of  $S$ .*



*Proof.* Define  $p$  to be a distribution on  $S$  with finite support,  $\{X_n\}_{n=1}^N$ . Pick an  $L > |X_n|$  for all  $n$ , so that with the definition of lemma 3,  $p_L = p$  and thus  $p \in \mathcal{M}_L$ . Now note that any distribution on  $S$  can be approximated at finitely many points in  $S$  arbitrarily well by distributions with finite support. The result follows from proposition 2.  $\square$

**Proposition 5.** *Finite-lag Markov models are subexponential.*

*Proof.* Say  $p \in \mathcal{M}_L$  for some  $L$ , with transition probabilities  $v$ . Every  $k \in \mathcal{B}_L^o$  that is Markov-accessible by  $p$  has a  $k' \in \mathcal{B}_L^o$  that is Markov-accessible from  $k$  in less than  $s_k$  transitions such that  $v_{k',s} > 0$ . Thus,  $\inf_i p(|X| \leq i + s_k \mid |X| > i, X_{i-L+1:i} = k) > 0$ . Define  $s = \max_{k \text{ accessible}} s_k$ ,  $q = \inf_i p(|X| \leq i + s \mid |X| > i) > 0$ . Now note, for any positive integer  $m$ ,  $p(|X| > ms) = \prod_{i=1}^m p(|X| > is \mid |X| > (i-1)s) \leq (1-q)^m$ . For a random variable  $Z \sim \text{Geom}(q)$ ,

$$\begin{aligned} \mathbb{E}_p \exp(t|X|) &= \int_0^\infty dy p \left( |X| > s \left( \frac{1}{st} \log(y) \right) \right) \\ &\leq \int_0^\infty dy p \left( |X| > s \left( \left\lfloor \frac{1}{st} \log(y) \right\rfloor \right) \right) \\ &\leq \int_0^\infty dy P \left( Z > \left( \left\lfloor \frac{1}{st} \log(y) \right\rfloor \right) \right) \\ &\leq \int_0^\infty dy P \left( Z > \left( \frac{1}{st} \log(y) - 1 \right) \right) \\ &= \mathbb{E} \exp(ts(Z+1)) \end{aligned} \tag{5}$$

The integral is finite for some  $t > 0$  as geometric random variables are sub-exponential.  $\square$

## E Consistency in the finite $L$ case

In this section we consider fitting to data BEAR models with fixed hyperparameters  $h$  and  $\theta$  (that is, standard Bayesian Markov models). We first study the asymptotic behavior of the posterior over  $v$ , the transition probability parameter, conditional on a particular lag  $L$ . We prove a Wald-type consistency result, showing that the posterior concentrates on a neighborhood of the true data-generating parameter value  $v^*$ , if such a value exists; when  $p^*$  is not in the model class  $\mathcal{M}_L$ , the posterior over  $v$  concentrates at the point  $v^*$  corresponding to the distribution  $p_{v^*} \in \mathcal{M}_L$  closest in KL divergence to  $p^*$ . We next study the asymptotic behavior of the posterior over the lag  $L$ , building on the theory of nested model selection since  $L$  is a discrete variable. We show that the posterior concentrates at the true data-generating value  $L^*$  when such a lag exists (i.e. when there is some  $L^*$  such that  $p^* \in \mathcal{M}_{L^*}$ ), and otherwise diverges. At a high level, neither of these results are surprising, and they would be expected to hold in general for well-behaved Bayesian models. The details of the model's asymptotic behavior, however, turn out to be somewhat unusual; as we shall see, the fact that some transitions from a particular kmer  $k$  to a base  $b$  have probability zero under the data-generating distribution  $p^*$  can complicate the normal story of Bayesian asymptotics.

To describe the possible kmer-base transitions, we define, for a distribution on  $S$ ,  $p$ , and a lag  $L$ , the set of accessible kmers  $\text{acc}_L(p) = \{k \in \mathcal{B}_L^o \mid p(\#k > 0) > 0\}$  and transitions  $\text{supp}_L(p) = \{(k, b) \mid k \in \mathcal{B}_L^o, b \in \tilde{\mathcal{B}}, p(\#(k, b) > 0) > 0\}$ . Define also, for any particular  $k \in \mathcal{B}_L^o$ , the set of allowed transitions  $\text{supp}_L(p)|_k := \{b \in \tilde{\mathcal{B}} \mid (k, b) \in \text{supp}_L(p)\}$ . Define the restriction of the parameter space  $\Delta_{\tilde{\mathcal{B}}}^{\mathcal{B}_L^o}$  to the support of  $p^*$ ,  $\tilde{\Delta}_L(p^*) = \prod_{k \in \text{acc}_L(p^*)} \Delta_{\text{supp}_L(p^*)|_k}$ . If  $v \in \Delta_{\tilde{\mathcal{B}}}^{\mathcal{B}_L^o}$ , we will often use the abbreviation  $\text{supp}(v) = \text{supp}_L(p_v)$  for convenience.

Say  $p^*$  is a distribution on  $S$  and  $L$  is a lag. Define the transition probabilities  $v^*$ , corresponding to the closest model in  $\mathcal{M}_L$  to  $p^*$  (as measured by KL), as

$$v^* = \arg \min_{v \in \Delta_{\tilde{\mathcal{B}}}^{\mathcal{B}_L^o}} \text{KL}(p^* \| p_v) = \arg \max_v \mathbb{E} \log p_v(X) = \arg \max_v \sum_{k,b} \mathbb{E} [\#(k, b)] \log v_{k,b}.$$

Unlike for many other statistical models studied in other contexts, here we can easily compute the closest model to the data-generating distribution: using Lagrange multipliers, one may see that for all  $k \in \text{acc}_L(p^*)$ ,  $v_{k,b}^* = \mathbb{E}[\#(k,b)] / \mathbb{E}[\#k]$ . We then define  $p^{*(L)} = p_{v^*}$  as the best approximation to  $p^*$  in  $\mathcal{M}_L$ . Note  $\text{supp}(v^*) = \text{supp}_L(p^{*(L)}) = \text{supp}_L(p^*)$ .

We now ask whether Bayesian inference on  $\mathcal{M}_L$  is consistent, i.e., whether the posterior converges to a point mass at  $p^{*(L)}$ , even in the case where  $\text{supp}_L(p^*)$  is not all of  $\mathcal{B}_L^o \times \bar{B}$ . The result is a classic Wald-type argument, adapted from theorem 2.3 of Miller [47] and theorem 1.3.4 in Ghosh and Ramamoorthi [24]. The primary difficulty in the proof is that these previous theorems assume the true parameter value lies on the interior of the parameter space and rely on uniform convergence of the mean log likelihood in a neighborhood around the true value. In our case, we can have  $v_{k,b}^* = 0$ , so that the true parameter value lies on the boundary of its space  $\Delta_{\mathcal{B}}^{\mathcal{B}_L^o}$  and the likelihood function diverges at this boundary point.

**Theorem 6.** *Say  $p^*$  is a distribution on  $S$  with  $\mathbb{E}|X| < \infty$ . Say  $\Pi$  is a prior on  $\Delta_{\mathcal{B}}^{\mathcal{B}_L^o}$  that assigns probability 0 to the set of  $v$  with  $p_v \notin \mathcal{M}_L$ . Say  $X_1, X_2, \dots \sim p^*$  iid. Call  $V = \{v \in \Delta_{\mathcal{B}}^{\mathcal{B}_L^o} \mid p_v = p^{*(L)}\}$  and assume that it is not disjoint from the support of  $\Pi$ . Then for all open sets  $U$  containing  $V$ ,*

$$\Pi(U|X_1, \dots, X_N) \rightarrow 1$$

*a.s.. As a probability distribution on the space of measures on  $S$ ,  $\Pi|X_1, \dots, X_N \rightarrow \delta_{p^{*(L)}}$ .*

*Proof.* Define  $v^*$  as the transition probabilities of  $p^{*(L)}$ . Define  $l_N(v) = -\frac{1}{N} \sum_{n=1}^N \log(p_v(X_n))$ , which is continuous in  $v$  and  $\nu^* = \min_{(k,b) \in \text{supp}(v^*)} v_{k,b}^*$ . Note that

$$\mathbb{E} \log p^{*(L)}(X) = \mathbb{E} \sum_{i=1}^{|X|} \log v_{X_{i-L:i-1}, X_i}^* \geq \mathbb{E}|X| \log \nu^*.$$

First we show that the likelihood of the data is eventually small in a neighborhood of the boundary. Pick an  $\eta_1 > 0$ . Say  $(k,b) \in \text{supp}(v^*) = \text{supp}_L(p^*)$  and define  $q_{k,b} = p^*(\#(k,b) > 0)$  which is positive. Pick a positive

$$\begin{aligned} \nu_{k,b} &< \exp\left(-q_{k,b}^{-1}(\eta_1 - \mathbb{E}|X| \log \nu^*)\right) \wedge v_{k,b}^*. \\ \mathbb{E} \sup_{v \text{ s.t. } v_{k,b} < \nu_{k,b}} l_1(v^*) - l_1(v) &= \mathbb{E} \left[ \sup_{v \text{ s.t. } v_{k,b} < \nu_{k,b}} \log p_v(X) \right] - \mathbb{E} [\log p_{v^*}(X)] \\ &\leq q_{k,b} \log \nu_{k,b} + (-\log \nu^*) \mathbb{E}|X| < -\eta_1. \end{aligned} \tag{6}$$

Thus defining  $U_1 = \{v \in \Delta_{\mathcal{B}}^{\mathcal{B}_L^o} \mid \text{there exists } (k,b) \in \text{supp}(v^*) \text{ s.t. } v_{k,b} < \nu_{k,b}\}$ , a.s., for large enough  $N$ ,  $l_N(v^*) - l_N(v) < -\eta_1$  for all  $v \in U_1$  by the SLLN.

Call the complement of  $U_1$   $K$ .  $K$  is compact and for all  $v \in K$ ,  $\text{supp}(v^*) \subseteq \text{supp}(v)$ . Note that  $V$  is compact and in the interior of  $K$ . Pick a positive  $\nu_K$  which has, for every  $(k,b) \in \text{supp}(v^*)$ ,  $\nu_K < \nu_{k,b}$ . Then

$$\mathbb{E} \sup_{v \in K} |l_1(v^*) - l_1(v)| \leq |\log(\nu_K \wedge \nu^*)| \mathbb{E}|X| < \infty.$$

Then by theorem 1.3.3 in Ghosh and Ramamoorthi [24], a.s.,  $l_N(v^*) - l_N(v)$  converges uniformly to  $\text{KL}(p^*||p^{*(L)}) - \text{KL}(p^*||p_v) \leq 0$  on  $K$  (note, for the application of theorem 1.3.3 in Ghosh and Ramamoorthi [24], this quantity is well defined even if  $p_v$  is not a distribution over finite strings).

Now pick an open neighborhood  $U$  of  $V$ . By the continuity of  $v \mapsto \text{KL}(p^*||p_v)$ , since  $K \setminus U$  is compact,  $\inf_{v \in K \setminus U} \text{KL}(p^*||p_v) > \text{KL}(p^*||p^{*(L)})$  otherwise there would be a  $v \in V \setminus K$ . Thus we can pick a positive  $\text{KL}(p^*||p^{*(L)}) + \eta_2 < \inf_{v \in K \setminus U} \text{KL}(p^*||p_v)$ . Since  $v \mapsto \text{KL}(p_{v^*}||p_v)$  is continuous and  $K$  is a neighborhood of  $V$ , there is an open  $U_2 \subset K \cap U$  containing  $V$  such that one can pick an  $\eta_3$  with  $\sup_{v \in U_2} \text{KL}(p^*||p_v) - \text{KL}(p^*||p^{*(L)}) < \eta_3 < \eta_1 \wedge \eta_2$ . Then a.s.

eventually,  $l_N(v^*) - l_N(v) < -\eta_2$  for all  $v \in K \setminus U$  and  $l_N(v^*) - l_N(v) > -\eta_3$  for all  $v \in U_2$ . Thus, a.s. for large enough  $N$ ,

$$\begin{aligned}
\Pi(U|X_1, \dots, X_n) &= \frac{\int_U d\Pi e^{N(l_N(v^*) - l_N(v))}}{\int_U d\Pi e^{N(l_N(v^*) - l_N(v))} + \int_{K \setminus U} d\Pi e^{N(l_N(v^*) - l_N(v))} + \int_{U_1 \setminus U} d\Pi e^{N(l_N(v^*) - l_N(v))}} \\
&\geq \left( 1 + \frac{\int_{K \setminus U} d\Pi e^{N(l_N(v^*) - l_N(v))}}{\int_{U_2} d\Pi e^{N(l_N(v^*) - l_N(v))}} + \frac{\int_{U_1} d\Pi e^{N(l_N(v^*) - l_N(v))}}{\int_{U_2} d\Pi e^{N(l_N(v^*) - l_N(v))}} \right)^{-1} \\
&\geq \left( 1 + \frac{\Pi(K \setminus U)e^{-N\eta_2}}{\Pi(U_2)e^{-N\eta_3}} + \frac{\Pi(U_1)e^{-N\eta_1}}{\Pi(U_2)e^{-N\eta_3}} \right)^{-1} \\
&\rightarrow 1.
\end{aligned} \tag{7}$$

Finally, as a probability distribution on the space of measures on  $S$ ,  $\Pi|X_1, \dots, X_n \rightarrow \delta_{p^*(L)}$ . This follows from the fact that the prior and thus posterior probability of  $p_v \notin \mathcal{M}_L$  is 0 and so one may push forward the measure from  $\Delta_{|\mathcal{B}|}^{\mathcal{B}_L^o}$  to the space of probability measures on  $S$ . The image of  $V$  is a point  $p_{v^*}$ . Since this mapping is continuous, it preserves the weak convergence of the measure, in this case to a point mass.  $\square$

Next we will study the posterior distribution of the BEAR model over the lag  $L$ , showing under general assumptions that the posterior concentrates on the true data-generating value  $L^*$  (when such a value exists). Our analysis builds off of standard asymptotic analyses of nested Bayesian model selection, since models with different lags are nested, i.e.  $\mathcal{M}_L \subset \mathcal{M}_{L'}$  when  $L' > L$ . Typically, when a simpler model (e.g.  $\mathcal{M}_L$ ) is nested inside a more complex model (e.g.  $\mathcal{M}_{L'}$ ), and the data-generating distribution  $p^*$  is in the simpler model, the log Bayes factor comparing the two models will asymptotically prefer the simpler model and scale as  $\frac{1}{2}(\dim' - \dim) \log N$  where  $\dim'$  is the dimension of the parameter space in the more complex model and  $\dim$  is the dimension in the simpler model [14]. This  $O(\log N)$  term, which is independent of the prior, can be thought of as originating from the Laplace approximation to the marginal likelihood; it is the basis of such widely used model-selection techniques as the Bayesian information criterion.

Somewhat surprisingly, the fact that some transitions may have probability zero ( $v_{k,b}^* = 0$ ) changes the asymptotic behavior of the log Bayes factor, in particular by altering the dimension factor  $\dim' - \dim$ . In effect, dimensions of the parameter space corresponding to kmers that occur with probability zero under  $p^*$  do not contribute to the dimension count, while dimensions for which  $v_{k,b}^* = 0$  do not count as full dimensions; this leads to the notion of an “effective model dimension”, defined as  $\dim_L^{\text{eff}}(p^*) := |\text{supp}_L(p^*)| - |\text{acc}_L(p^*)| + \sum_{k \in \text{acc}_L(p^*)} \sum_{b \notin \text{supp}_L(p^*)|_k} \alpha_{k,b}$  where  $\alpha_{k,b}$  is the concentration of the Dirichlet prior. This effective dimension depends the data-generating distribution  $p^*$  and on the prior hyperparameters, not just on  $L$ . Note that the unusual asymptotic behavior of BEAR models does not just come from their Markov structure; even in the everyday example of a Dirichlet-Categorical model, if some outcomes of the Categorical distribution have probability exactly zero under the true data-generating distribution, the standard Laplace approximation does not hold, and the Dirichlet prior contributes  $O(\log N)$  terms to the log marginal likelihood [62].

**Theorem 7.** *Say  $p^*$  is a distribution on  $S$  with  $\mathbb{E}|X|^2 < \infty$  and say  $X_1, X_2, \dots \sim p^*$  iid. Given  $L$ , consider a Dirichlet $(\alpha_{k,b})_{b \in \mathcal{B}}$  prior on the simplex in  $\Delta_{\mathcal{B}}^{\mathcal{B}_L^o}$  corresponding to the  $L$ -mer  $k$ . For all  $L$ , assume  $\alpha_{k,b} > 0$  for  $(k, b) \in \text{supp}_L(p^*)$  (otherwise  $p((X_n)_{n=1}^N | \mathcal{M}_L)$  is eventually 0 a.s.).*

Define  $\text{KL}(p^*||\mathcal{M}_L) := \inf_{p \in \mathcal{M}_L} \text{KL}(p^*||p)$ . Given  $L_1 \neq L_2$ , if <sup>[2]</sup>  $\text{KL}(p^*||\mathcal{M}_{L_2}) > \text{KL}(p^*||\mathcal{M}_{L_1})$ ,

$$\log \frac{p((X_n)_{n=1}^N | \mathcal{M}_{L_1})}{p((X_n)_{n=1}^N | \mathcal{M}_{L_2})} = N (\text{KL}(p^*||\mathcal{M}_{L_2}) - \text{KL}(p^*||\mathcal{M}_{L_1})) + O_p(\sqrt{N}). \quad (8)$$

Otherwise, if  $p^* \in \mathcal{M}_{L_1}, \mathcal{M}_{L_2}$  and, defining, for a lag  $L$ ,  $\text{dim}_L^{\text{eff}}(p^*) := |\text{supp}_L(p^*)| - |\text{acc}_L(p^*)| + \sum_{k \in \text{acc}_L(p^*)} \sum_{b \notin \text{supp}_L(p^*)|_k} \alpha_{k,b}$ ,

$$\log \frac{p((X_n)_{n=1}^N | \mathcal{M}_{L_1})}{p((X_n)_{n=1}^N | \mathcal{M}_{L_2})} = \frac{1}{2} (\text{dim}_{L_2}^{\text{eff}}(p^*) - \text{dim}_{L_1}^{\text{eff}}(p^*)) \log N + O_p(1). \quad (9)$$

*Proof.* For a lag  $L$ , note  $\text{dim}(\tilde{\Delta}_L(p^*)) = \text{supp}_L(p^*) - \text{acc}_L(p^*)$ . Put a Dirichlet  $(\alpha_{k,b})_{b \in \text{supp}_L(p^*)|_k}$  prior on each  $\Delta_{\text{supp}_L(p^*)|_k}$ . Call  $\mathcal{M}_L$  the set of probability distributions described by  $\tilde{\Delta}_L(p^*)$ . We will show that  $\text{KL}(p^*||p)$  is maximized in the interior of  $\tilde{\Delta}_L(p^*)$  so that the asymptotics of the marginal likelihood  $(p(X|\mathcal{M}_L))$  are well understood. In  $\Delta_{|\tilde{\mathcal{B}}|}^{\mathcal{B}_L^2}$  however, there are dimensions that correspond to k-mer - base transitions that are impossible under  $p^*$ . Using the symmetry of the Dirichlet prior, we can de-couple the asymptotics of these excess dimensions from the asymptotics of the much more "natural" space of  $\tilde{\Delta}_L(p^*)$ :

$$\begin{aligned} \log(p((X_n)_{n=1}^N | \mathcal{M}_L)) &= \sum_{k \in \text{acc}_L(p^*)} \left( \log \frac{\Gamma(\sum_b \alpha_{k,b})}{\Gamma(\sum_b \alpha_{k,b} + \#k)} - \sum_{\text{supp}_L(p^*)|_k} \log \frac{\Gamma(\alpha_{k,b})}{\Gamma(\alpha_{k,b} + \#(k,b))} \right) \\ &= \log(p((X_n)_{n=1}^N | \tilde{\mathcal{M}}_L)) \\ &\quad + \sum_{k \in \text{acc}_L(p^*)} \left( \log \frac{\Gamma(\sum_b \alpha_{k,b})}{\Gamma(\sum_b \alpha_{k,b} + \#k)} - \log \frac{\Gamma(\sum'_b \alpha_{k,b})}{\Gamma(\sum'_b \alpha_{k,b} + \#k)} \right) \end{aligned} \quad (10)$$

where  $\sum'_b$  is a sum over the  $b \in \text{supp}_L(p^*)|_k$ , and where  $\#k$  in this case is  $\sum_{n=1}^N \#k(X_n)$  and  $\#(k,b)$  is similar. We will deal with each of these terms in turn.

To analyze the first of these terms, we first check regularity conditions. For  $v \in \tilde{\Delta}_L(p^*)$  and strings  $X_1, \dots, X_N$ , define

$$\begin{aligned} l_N(v) &= -\frac{1}{N} \log \prod_{n=1}^N p_v(X_n) = -\frac{1}{N} \sum_{(k,b) \in \text{supp}_L(p^*)} \#(k,b) \log v_{k,b} \\ l(v) &= -\mathbb{E} \log p_v(X) = - \sum_{(k,b) \in \text{supp}_L(p^*)} \mathbb{E}[\#(k,b)] \log v_{k,b}. \end{aligned}$$

Call  $v_n$  the minimizer of  $l_N$  and  $v^*$  the minimizer of  $l$ . Note  $v^*$  is also the minimizer of  $v \mapsto \text{KL}(p^*||p_v)$  for  $v \in \tilde{\Delta}_L(p^*)$  and has  $v_{k,b}^* = \mathbb{E}\#(k,b)/\mathbb{E}\#k$ . In particular  $p_{v^*} = p^{*(L)}$  so that  $\text{KL}(p^*||\mathcal{M}_L) = \text{KL}(p^*||\tilde{\mathcal{M}}_L)$ . One may check that  $l_N$  is  $C^\infty$ , and, by seeing that it is a sum of convex functions, convex. Calling  $D^m$  the m-th derivative operator ( $D^0$  the identity),  $\|\cdot\|$  some norm on  $\mathbb{R}^{\text{dim}(\tilde{\Delta}_L(p^*))^m}$ , and  $E$  some set whose closure is in the interior of  $\tilde{\Delta}_L(p^*)$

$$\mathbb{E} \sup_{v \in E} \|D^m l_N(v)\| \leq \sum_{(k,b) \in \text{supp}_L(p^*)} \mathbb{E}[\#(k,b)] \sup_{v \in E} \|D^m \log v_{k,b}\| < \infty$$

since  $E$  is relatively compact. Thus, by theorem 1.3.3 of Ghosh and Ramamoorthi <sup>[24]</sup>,  $D^m l_N \rightarrow \mathbb{E} D^m l_1 = D^m l$  locally uniformly where the last equality is by Leibniz's rule due to the local boundedness of all derivatives. In particular,  $D^3 l_N$  are uniformly bounded across

<sup>2</sup>We do not need to assume  $\mathbb{E} \log p > -\infty$  as we may define in this case  $\text{KL}(p^*||\mathcal{M}_{L_2}) - \text{KL}(p^*||\mathcal{M}_{L_1}) = -\mathbb{E} \log p^{*(L_2)}(X) + \mathbb{E} \log p^{*(L_1)}(X)$  which we will see is bounded by the moment bound assumption  $\mathbb{E}|X|^2 < \infty$ .

$N$  on a neighborhood of  $v^*$  and, sending  $E \nearrow \tilde{\Delta}_L(p^*)$ , and noting  $l_N$  is a.s. eventually  $-\infty$  on the boundary of  $\tilde{\Delta}_L(p^*)$ , we see  $l_N \rightarrow l$  pointwise a.s..

As in the analysis of Dawid [14], we write

$$\log p((X_n)_{n=1}^N | \tilde{\mathcal{M}}_L) = \log \frac{p((X_n)_{n=1}^N | \tilde{\mathcal{M}}_L)}{p_{v_N}(X_n)_{n=1}^N} + \log \frac{p_{v_N}(X_n)_{n=1}^N}{p^{*(L)}(X_n)_{n=1}^N} + \log p^{*(L)}(X_n)_{n=1}^N.$$

The above paragraph demonstrates that we satisfy conditions (2) of theorem 3.2 of Miller [47] and thus we can write

$$\log \frac{p((X_n)_{n=1}^N | \tilde{\mathcal{M}}_L)}{p_{v_N}(X_n)_{n=1}^N} = -\frac{1}{2} \dim(\tilde{\Delta}_L(p^*)) \log N + O(1)$$

and say that  $v_N \rightarrow v^*$ . Now, using the mean value theorem,

$$\log \frac{p_{v_N}(X_n)_{n=1}^N}{p^{*(L)}(X_n)_{n=1}^N} = -n(l_N(v_N) - l_N(v^*)) = -(\sqrt{N}(v^* - v_N))^T D^2 l_N(v') (\sqrt{N}(v^* - v_N))$$

for some  $v'_N$  on the ray connecting  $v^*$  and  $v_N$ . Call  $Z_N = \sqrt{D^2 l_N(v'_N)} (\sqrt{N}(v^* - v_N))$ . By local uniform convergence, since  $v_N \rightarrow v^*$ ,  $D^2 l_N(v'_N) \rightarrow D^2 l(v^*)$ . Satisfying the conditions on a neighborhood of  $v^*$ , since  $v_N \rightarrow v^*$ , by theorem 5.41 in van der Vaart [75],  $\sqrt{N}(v^* - v_N)$  converges in distribution to  $N(0, D^2 l(v^*)^{-1})$ . Thus, by Slutsky's theorem,  $Z_n$  converges to  $N(0, I)$ , and by the continuous mapping theorem  $\log \frac{p_{v_N}(X_n)_{n=1}^N}{p_{v_0}(X_n)_{n=1}^N} = Z_n^T Z_n$  converges in distribution to  $\chi_{\dim(\tilde{\Delta}_L(p^*))}^2$ ; thus this term is  $O_P(1)$ . Recall from the remark in the last paragraph that  $\text{KL}(p^* | \tilde{\mathcal{M}}_L) = \text{KL}(p^* | \mathcal{M}_L)$  for all  $L$ ; note in particular  $p^* \in \tilde{\mathcal{M}}_L$  if and only if  $p^* \in \mathcal{M}_L$ . Then finally, by the analysis of Dawid [14], since  $\mathbb{E}[\log p^{*(L)}(X_n)_{n=1}^N]^2 \leq (\log(\min_{k,b} v_{k,b}^{-1}))^2 \mathbb{E}|X|^2 < \infty$ ,  $\log p^{*(L)}(X_n)_{n=1}^N = \log p^*(X_n)_{n=1}^N$  if  $p^* \in \tilde{\mathcal{M}}_L$  and

$$\log p^{*(L)}(X_n)_{n=1}^N = N [-\text{KL}(p^* | \mathcal{M}_L) + \mathbb{E} \log p(X)] + O_P(\sqrt{N})$$

otherwise.

By our analysis above we can say that given  $L_1 \neq L_2$ , if  $\text{KL}(p^* | \mathcal{M}_{L_2}) > \text{KL}(p^* | \mathcal{M}_{L_1})$ ,

$$\log \frac{p((X_n)_{n=1}^N | \tilde{\mathcal{M}}_{L_1})}{p((X_n)_{n=1}^N | \tilde{\mathcal{M}}_{L_2})} = N (\text{KL}(p^* | \mathcal{M}_{L_2}) - \text{KL}(p^* | \mathcal{M}_{L_1})) + O_P(\sqrt{N}). \quad (11)$$

Otherwise, if  $p^* \in \mathcal{M}_{L_1}, \mathcal{M}_{L_2}$ ,

$$\log \frac{p((X_n)_{n=1}^N | \tilde{\mathcal{M}}_{L_1})}{p((X_n)_{n=1}^N | \tilde{\mathcal{M}}_{L_2})} = \frac{1}{2} (\dim(\tilde{\Delta}_{L_2}(p^*)) - \dim(\tilde{\Delta}_{L_1}(p^*))) \log N + O_P(1). \quad (12)$$

Moving to the second term, for a  $k \in \text{supp}(v^*)$ , by Stirling's formula,

$$\begin{aligned}
& \left( \log \frac{\Gamma(\sum_b \alpha_{k,b})}{\Gamma(\sum_b \alpha_{k,b} + \#k)} + \log \frac{\Gamma(\sum'_b \alpha_{k,b} + \#k)}{\Gamma(\sum'_b \alpha_{k,b})} \right) \\
&= \left( \sum_b \alpha_{k,b} - \frac{1}{2} \right) \log \left( \sum_b \alpha_{k,b} \right) - \sum_b \alpha_{k,b} \\
&\quad - \left( \#k + \sum_b \alpha_{k,b} - \frac{1}{2} \right) \log \left( \#k + \sum_b \alpha_{k,b} \right) + \left( \#k + \sum_b \alpha_{k,b} \right) \\
&\quad - \left( \sum'_b \alpha_{k,b} - \frac{1}{2} \right) \log \left( \sum'_b \alpha_{k,b} \right) + \sum'_b \alpha_{k,b} \\
&\quad + \left( \#k + \sum'_b \alpha_{k,b} - \frac{1}{2} \right) \log \left( \#k + \sum'_b \alpha_{k,b} \right) - \left( \#k + \sum'_b \alpha_{k,b} \right) \\
&\quad + O(1) \\
&= \left( \#k + \sum'_b \alpha_{k,b} - \frac{1}{2} \right) \log \left( \frac{\sum'_b \alpha_{k,b} + \#k}{\sum_b \alpha_{k,b} + \#k} \right) \\
&\quad - \left( \sum_b \alpha_{k,b} - \sum'_b \alpha_{k,b} \right) \log \left( \sum_b \alpha_{k,b} + \#k \right) + O(1) \\
&= \left( \#k + \sum'_b \alpha_{k,b} - \frac{1}{2} \right) O\left(\frac{1}{\#k}\right) \\
&\quad - \left( \sum_b \alpha_{k,b} - \sum'_b \alpha_{k,b} \right) \log \#k + O(1) \\
&= - \left( \sum_{b \notin \text{supp}(p^*)|_k} \alpha_{k,b} \right) \log \#k + O(1)
\end{aligned} \tag{13}$$

Now note  $\log \#k = \log N + \log \left( \frac{1}{N} \#k \right) = \log N + O(1)$  by the strong law of large numbers. Putting this together with [11](#), [12](#), [10](#), and [13](#) gives the result.  $\square$

So far, we've studied pairwise comparisons between models with different lags; we now study the posterior over lags. We start with the case where there is no true data-generating lag, i.e.  $p^* \notin \mathcal{M}$ . In this case, we can apply theorem [7](#) to show that the posterior over lags diverges to infinity.

**Corollary 8.** *Let  $\pi(L)$  denote a prior over lags, with  $\pi(L) > 0$  for all  $L$ . Choose for each lag a Dirichlet prior on the simplex  $\Delta_{\mathcal{B}}^{\mathcal{B}_L^0}$  that satisfies the conditions of Theorem [7](#). If  $p^*$  is subexponential but  $p^* \notin \mathcal{M}$ , the posterior diverges in the sense that for any choice of lag  $\tilde{L}$ , we have  $\Pi(L > \tilde{L} | (X_n)_{n=1}^N) \rightarrow 1$  a.s..*

*Proof.* It is shown in the proof of theorem [23](#) that as  $L \rightarrow \infty$ , we have  $\text{KL}(p^* \| \mathcal{M}_L) \rightarrow 0$ . Say  $\tilde{L}$  is a lag, so, since  $p^* \notin \mathcal{M}_{\tilde{L}}$ , there exists some  $\tilde{L}' > \tilde{L}$  such that  $\text{KL}(p^* \| \mathcal{M}_{\tilde{L}'} < \text{KL}(p^* \| \mathcal{M}_{\tilde{L}}) \leq \text{KL}(p^* \| \mathcal{M}_L)$  for all  $L \leq \tilde{L}$ . Note we have

$$\Pi(L \leq \tilde{L} | (X_n)_{n=1}^N) \leq \frac{\sum_{L \leq \tilde{L}} p((X_n)_{n=1}^N | \mathcal{M}_{L'})}{\sum_{L \leq \tilde{L}} p((X_n)_{n=1}^N | \mathcal{M}_{L'}) + p((X_n)_{n=1}^N | \mathcal{M}_{\tilde{L}'})}.$$

There are only finitely many  $L'$  less than or equal to  $\tilde{L}$ , so we can apply theorem [7](#) and the conclusion follows.  $\square$



We now consider the case where  $p^* \in \mathcal{M}$ . Pick  $L^*$  to be the minimum lag such that  $p^* \in \mathcal{M}_{L^*}$ . We will need to assume, for theoretical tractability, that the prior over lags has finite support. Then we can establish sufficient conditions for the posterior to concentrate on the true value  $L^*$ .

**Lemma 9.** *Let  $\pi(L)$  be a prior over lags with  $\pi(L) > 0$  for all  $L$  less than some  $\tilde{L} \geq L^*$ , and with  $\pi(L) = 0$  for all  $L > \tilde{L}$ . Then  $\Pi(L^* | (X_n)_{n=1}^N) \rightarrow 1$  in probability if  $(\dim_L^{\text{eff}}(p^*))_{L \geq L^*}$  is non-decreasing and  $\dim_{L^*+1}^{\text{eff}}(p^*) > \dim_{L^*}^{\text{eff}}(p^*)$ .*

*Proof.* Apply theorem [7](#). □

If transition probabilities  $v_{k,b}^*$  were always non-zero, the effective dimension of the model would simply be the dimension of the parameter space  $\Delta_{\tilde{\mathcal{B}}}^{\mathcal{B}_L^o}$ , and thus the dimension would always increase with increasing lag, making lag selection consistent. Allowing for  $v_{k,b}^* = 0$  makes the situation more complicated, since in fact the effective dimension may not increase with increasing lag. If this is indeed the case, the posterior will no longer be guaranteed to determine the true  $L^*$  from data, even asymptotically. In order to describe how the effective dimension in fact scales with the lag, we will introduce the notion of a distribution's de Bruijn graph: for a distribution  $p$  on  $S$ , the  $L$ -mer de Bruijn graph is the directed graph with nodes  $\text{acc}_L(p)$  and a directed edge connecting  $L$ -mers  $k \rightarrow k'$  if  $k' = (k_{2:L}, b)$  for a  $b \in \text{supp}_L(p)|_k$ . (De Bruijn graphs are a common data analysis tool in biological sequence analysis, where they are typically constructed from an empirical distribution over observed sequences; here, we are in effect studying the asymptotic de Bruijn graph, i.e. the de Bruijn graph that we would have if an infinite amount of data were observed.) Call a de Bruijn graph a tree if every node has at most one parent (since sequences must start and end with start and stop symbols, there cannot be a loop where each kmer has just one parent). The next two results show that we can only consistently infer the true lag if the  $L^*$ -mer de Bruijn graph of  $p^*$  is not a tree.

**Proposition 10.** *Say  $p^* \in \mathcal{M}_{L^*}$  and for each  $L$ , consider a  $\text{Dirichlet}(\alpha_{k,b})_{b \in \tilde{\mathcal{B}}}$  prior on the simplex in  $\Delta_{\tilde{\mathcal{B}}}^{\mathcal{B}_L^o}$  corresponding to the  $L$ -mer  $k$ . Say for  $L \geq L^*$ , for all  $L$ -mers  $k$  and bases  $b$ ,  $\alpha_{k,b} = \alpha_{k_{L-L^*+1:L},b}$  (i.e. the prior concentration depends only on the last  $L^*$  letters of the  $L$ -mer). There exists a  $\tilde{L}$  (possibly infinity) such that for all  $L \geq L^*$ , the  $L$ -mer de Bruijn graph is a tree if and only if  $L > \tilde{L}$ . Then  $(\dim_L^{\text{eff}}(p^*))_{L \geq L^*}$  is a non-decreasing sequence, strictly increasing until  $\tilde{L}$ , and constant past  $\tilde{L}$ .*

*Proof.* Call  $v^*$  the transition coefficients of  $p^*$ . Say  $L > L^*$ ,  $k \in \text{acc}_L(p^*)$ . Call  $k' \in \text{acc}_{L^*}(p^*)$  the last  $L^*$  letters of  $k$ . If for some  $b \in \tilde{\mathcal{B}}$ ,  $p^*(\#(k,b) > 0) > 0$  then clearly  $p^*(\#(k',b) > 0)$  thus  $\text{supp}_L(p^*)|_k \subseteq \text{supp}_{L^*}(p^*)|_{k'}$ . On the other hand, say  $b \in \text{supp}_{L^*}(p^*)|_{k'} = \text{supp}(v^*)|_{k'}$  and  $Y$  is a string, not terminated with  $\$, and with its last  $L$  characters equal to  $k$  and  $p^*(Y \dots) \cdot p^*((Y,b) \dots | Y \dots) = v_{k',b}^* > 0$  so,  $p^*(\#(k,b) > 0) > 0$ . Thus  $\text{supp}_L(p^*)|_k = \text{supp}_{L^*}(p^*)|_{k'}$ .$

Now write

$$\dim_L^{\text{eff}}(p^*) = \sum_{k \in \text{acc}_L(p^*)} \sum_{b \in \text{supp}_L(p^*)|_k} [\mathbb{1}_{b \in \text{supp}_L(p^*)|_k} + \mathbb{1}_{b \notin \text{supp}_L(p^*)|_k} \alpha_{k,b}] - 1$$

where, for a statement  $A$ ,  $\mathbb{1}_A = 1$  if  $A$  is true and  $\mathbb{1}_A = 0$  if  $A$  is false. Thus, since in this case  $\text{supp}_L(p^*)|_k = \text{supp}_{L^*}(p^*)|_{k'}$ , and by the assumption on the prior coefficients,

$$\begin{aligned} \dim_L^{\text{eff}}(p^*) &= \sum_{k' \in \text{acc}_{L^*}(p^*)} |\{k \in \text{acc}_L(p^*) \mid k_{L-L^*+1:L} = k'\}| \\ &\quad \times \left( \sum_{b \in \text{supp}_L(p^*)|_{k'}} [\mathbb{1}_{b \in \text{supp}_L(p^*)|_{k'}} + \mathbb{1}_{b \notin \text{supp}_L(p^*)|_{k'}} \alpha_{k',b}] - 1 \right). \end{aligned} \quad (14)$$

Since for each  $k' \in \text{acc}_{L^*}(p^*)$  there is a  $k \in \text{acc}_L(p^*)$  that has its last  $L^*$  letters equal to  $k'$ ,  $\dim_L^{\text{eff}}(p^*) \geq \dim_{L^*}^{\text{eff}}(p^*)$ . Since  $p^* \in \mathcal{M}_L$  for all  $L \geq L^*$  the argument may be repeated for all pairs  $L_1 > L_2 \geq L^*$  to conclude  $(\dim_L^{\text{eff}}(p^*))_{L \geq L^*}$  is non-decreasing.

Note if for  $L' > L$ ,  $\dim_{L'}^{\text{eff}}(p^*) = \dim_L^{\text{eff}}(p^*)$  then for all  $k' \in \text{acc}_L(p^*)$  there is a unique  $k \in \text{acc}_{L'}(p^*)$  with its last  $L$  letters equal to  $k$ . Thus if  $X_1, X_2 \in S$  with  $p^*(X_1), p^*(X_2) > 0$  and  $X_1, X_2$  end in the same last  $L$  letters (not including  $\$$ ), then  $X_1, X_2$  end in the same last  $L'$  letters. Looking at positions  $|X_j| - L' : |X_j| - L' + L - 1$ , one can also conclude that  $X_1, X_2$  end in the same last  $L' + (L' - L)$  letters. Continuing, one may conclude  $X_1 = X_2$ . It can be seen that this is equivalent to the  $L$ -mer de Bruijn of  $p^*$  being a tree. On the other hand it is not difficult to see that if the  $L$ -mer de Bruijn of  $p^*$  is a tree then  $\dim_{L'}^{\text{eff}}(p^*) = \dim_L^{\text{eff}}(p^*)$  for all  $L' > L$ .  $\square$

**Corollary 11.** *Say  $p^* \in \mathcal{M}$  and  $L^*$  is the minimum lag such that  $p^* \in \mathcal{M}_{L^*}$ . Let  $\pi(L)$  be a prior over lags with  $\pi(L) > 0$  for all  $L$  less than some  $\tilde{L} \geq L^*$ , and with  $\pi(L) = 0$  for all  $L > \tilde{L}$ . For each  $L$ , consider a Dirichlet  $(\alpha_{k,b})_{b \in \mathcal{B}}$  prior on the simplex in  $\Delta_{\mathcal{B}}^{\mathcal{B}_L^o}$  corresponding to the  $L$ -mer  $k$ . Assume that for  $L \geq L^*$ , for all  $L$ -mers  $k$  and bases  $b$ ,  $\alpha_{k,b} = \alpha_{k_{L-L^*+1:L},b}$ . Then lag selection is consistent if and only if the  $L^*$ -mer de Bruijn graph of  $p^*$  is not a tree.*

*Remark 1.* If  $p^*(X) > 0$  for infinitely many  $X \in S$ , as is the case if the transition coefficients of  $p^*$  are all positive or there is a cycle in the  $L^*$ -mer de Bruijn graph of  $p^*$ , then no  $L$ -mer de Bruijn graph of  $p^*$  is a tree as sequences with  $p(X) > 0$  cannot be identified by their last  $L$  letters. As another example, pick a particular sequence  $X \in S$  and say  $X'$  is one letter away from  $X$ . For a  $0 < q < 1$ , define  $p = q\delta_X + (1-q)\delta_{X'}$ . Pick  $L^*$  the smallest lag such that  $p^* \in \mathcal{M}_{L^*}$ . Then the  $L^*$ -mer de Bruijn graph splits into two paths at the position where  $X$  and  $X'$  differ. These paths may rejoin after  $L^*$  nodes. Thus the  $L^*$ -mer de Bruijn graph is a tree if and only if the position at which  $X$  and  $X'$  differ is less than  $L^*$  letters away from the end symbol  $\$$ .

## F Misspecification detection

In this section, we turn from studying the parameter  $v$  and lag  $L$  in the BEAR model to studying the hyperparameters  $h$  and  $\theta$ . Intuitively, we expect the empirical Bayes estimate of  $h$  to behave as a diagnostic of misspecification, since  $h$  controls the extent to which the prior predictive distribution of the BEAR model is concentrated at the embedded AR model. Here we make this idea rigorous by examining the asymptotic behavior of the empirical Bayes estimates of  $h$  and  $\theta$ .

We first briefly introduce the setup and some notation. We will assume  $p^*$  is subexponential. We will work with fixed lag  $L$ , though the results can be straightforwardly extended to the case of a prior over a finite number of lags. The function  $f : \Theta \mapsto \Delta_{\mathcal{B}}^{\mathcal{B}_L^o}$  defines an autoregressive model, with parameter space  $\Theta$  some set. For any  $h > 0, \theta \in \Theta$ , define a prior  $\pi(\cdot|h, \theta)$  on  $\Delta_{\mathcal{B}}^{\mathcal{B}_L^o}$  consisting of independent Dirichlet  $(\frac{1}{h}f_{k,b}(\theta))_{b \in \mathcal{B}}$  priors on each simplex corresponding to  $k \in \mathcal{B}_L^o$ . Define  $m((X_n)_{n=1}^N|h, \theta)$  to be the marginal likelihood of the data  $(X_n)_{n=1}^N$  under the prior  $\pi(\cdot|h, \theta)$ , that is  $m((X_n)_{n=1}^N|h, \theta) = \int p_v((X_n)_{n=1}^N)\pi(v|h, \theta)$ . For our purposes we may assume  $f_{k,b}(\theta) > 0$  for all  $(k, b) \in \text{supp}_L(p^*)$ ; if this is not the case for some  $\theta$  then the marginal likelihood at  $\theta$ , for any choice of  $h$ , is a.s. eventually 0. We will study maximum marginal likelihood/empirical Bayes estimates  $(h_N, \theta_N) = \arg\max_{h, \theta} m((X_n)_{n=1}^N|h, \theta)$ .

Our starting point is the analysis of empirical Bayes presented in Petrone et al. [54]. Here is the (very heuristic) intuition behind their result: the Laplace approximation to the marginal likelihood is proportional to the probability of the true data-generating parameter under the prior, so asymptotically we expect  $m((X_n)_{n=1}^N|h, \theta) \propto \pi(v^*|h, \theta)$ . Then, roughly speaking, the empirical Bayes estimate will be  $(h_N, \theta_N) \approx \arg\max_{h, \theta} \pi(v^*|h, \theta)$ ; in other words, the empirical Bayes estimate should asymptotically maximize the probability of the true parameter parameter value under the prior. Petrone et al. [54] give conditions under which this is indeed true, but BEAR models fail to meet them. There are two major problems: (1) in the limit as  $h \rightarrow 0$ , the prior converges to a point mass, making the Laplace approximation invalid (the “degenerate” case mentioned by Petrone et al. [54]) and (2) when some transitions have probability zero,  $v_{k,b}^* = 0$ , the standard Laplace approximation does not hold regardless of the value of  $h$ . Our analysis in this section adjusts for both these issues, and also provides more detailed insight such as convergence rates and intuitive approximations for the optimal  $h$ .

In analyzing extremum estimators, such as the maximum marginal likelihood estimator used in empirical Bayes, uniform convergence results are particularly powerful. Ideally, we might try to establish a Laplace-like approximation to the marginal likelihood that holds uniformly for all  $h$  and  $\theta$ , but this is unavailable because of the degeneracy at  $h = 0$ . Our strategy will be to first demonstrate a uniform Laplace approximation over all  $h, \theta$  with some caveats: (1) we ignore transitions that are not possible under  $p^*$  and analyze their contribution to the likelihood later; (2) if  $h \rightarrow 0$  we assume it does not decrease too fast; and (3) we assume similar control over the prior density at the "true" transition probabilities  $v^*$ . In proposition [13](#) we prove that (3) must indeed hold for when  $h_N, \theta_N$  are the maximizers of the marginal likelihood.

For any  $v \in \tilde{\Delta}_L(p^*)$ , define the negative average log likelihood  $l_N(v) = -\frac{1}{N} \log p_v(X_n)_{n=1}^N$ , and let  $v_N \in \tilde{\Delta}_L(p^*)$  be the (a.s. eventually unique) maximizer of  $l_N$ . Define a prior  $\tilde{\pi}(\cdot|h, \theta)$  on  $\tilde{\Delta}_L(p^*)$  consisting of independent  $\text{Dirichlet}(\frac{1}{h} f_{k,b}(\theta))_{b \in \text{supp}_L(p^*)|_k}$  priors on each simplex corresponding to  $k \in \text{acc}_L(p^*)$  (for a scalar  $\alpha$ ,  $\text{Dirichlet}(\alpha)$  is just defined as the point mass on the 0-dimensional simplex  $\{1\}$ ). Let  $\tilde{m}((X_n)_{n=1}^N|h, \theta)$  denote the marginal likelihood under the prior  $\tilde{\pi}(\cdot|h, \theta)$  and define

$$\log r_N(h, \theta) = \sum_{k \in \text{acc}_L(p^*)} \left( \log \frac{\Gamma(\sum_b \frac{1}{h} f_{k,b}(\theta))}{\Gamma(\sum_b \frac{1}{h} f_{k,b}(\theta) + \#k)} - \log \frac{\Gamma(\sum'_b \frac{1}{h} f_{k,b}(\theta))}{\Gamma(\sum'_b \frac{1}{h} f_{k,b}(\theta) + \#k)} \right)$$

where  $\sum'_b$  is a sum over the  $b \in \text{supp}_L(p^*)|_k$ . So, as shown in theorem [7](#),  $\log m((X_n)_{n=1}^N|h, \theta) = \log \tilde{m}((X_n)_{n=1}^N|h, \theta) + \log r_N(h, \theta)$ . define  $B(v, \eta)$  to be the ball of radius  $\eta$  around  $v$  in some norm; finally, define  $B_{\text{KL}}(\eta) = \{v \in \tilde{\Delta}_L(p^*) \mid \mathbb{E} \log \frac{p^{*(L)}(X)}{p_v(X)} < \eta\}$  and, for convenience  $B(\eta) = B(v^*, \eta)$ , for any  $\eta > 0$ .

**Theorem 12.** *With probability 1, for any sequence  $(h_N)_N$  and  $(\theta_N)_N$ , possibly dependent on the data, if  $h_N N^{1/4-\epsilon} \rightarrow \infty$  for an  $1/4 > \epsilon > 0$  and  $\liminf(\log \tilde{\pi}(v^*|h_N, \theta_N))/\sqrt{N} \neq -\infty$ , then*

$$\left| \log \tilde{m}((X_n)_{n=1}^N|h_N, \theta_N) - \left( -N l_N(v_N) - \frac{1}{2} \dim \tilde{\Delta}_L(p^*) \log N + \log \tilde{\pi}(v^*|h_N, \theta_N) + C_{v^*} \right) \right| \rightarrow 0$$

for a fixed  $C_{v^*}$  dependent only on  $v^*$ .

*Proof.* First note, calling  $e_{k,b}$  the indicator vector at position  $k, b$  for some  $k \in \text{acc}_L(p^*), b, b' \in \text{supp}_L(p^*)|_k$ , the directional derivatives with respect to  $v$

$$D_{e_{k,b} - e_{k,b'}} \log \tilde{\pi}(v|h, \theta) = \frac{\frac{1}{h} f_{k,b}(\theta) - 1}{v_{k,b}} - \frac{\frac{1}{h} f_{k,b'}(\theta) - 1}{v_{k,b'}}$$

are bounded by  $J/h$ , for some  $J > 0$  in a neighborhood of  $v^*$  for all  $\theta$ .

For an  $\eta > 0$ , define the KL ball

$$\hat{B}_{\text{KL}}(\eta) = \{v \in \tilde{\Delta}_L(p^*) \mid v_{k,b} \geq v_{k,b}^*(1 - \eta/\mathbb{E}|X|) \ \forall k, b\}.$$

Note if  $v \in \hat{B}_{\text{KL}}(\eta)$ , then the KL divergence is bounded,

$$\mathbb{E} \log \frac{p^{*(L)}(X)}{p_v(X)} \leq (\mathbb{E}|X|) \sup_{k,b} \log \frac{v_{k,b}^*}{v_{k,b}} \leq \eta$$

so  $v \in B_{\text{KL}}(\eta)$ . Note

$$(w_{k,b})_{(k,b) \in \text{supp}_L(p^*)} \mapsto \left( \frac{\eta}{\mathbb{E}|X|} w_{k,b} + v_{k,b}^* \left( 1 - \frac{\eta}{\mathbb{E}|X|} \right) \right)_{(k,b) \in \text{supp}_L(p^*)}$$

is a diffeomorphism from  $\tilde{\Delta}_L(p^*)$  to  $\hat{B}_{\text{KL}}$  so by the change of variables theorem the volume of  $\hat{B}_{\text{KL}}$  is  $(\eta/\mathbb{E}|X|)^{\dim \tilde{\Delta}_L(p^*)}$  (which comes from the factor multiplying  $w_{k,b}$ ) times the volume of  $\tilde{\Delta}_L(p^*)$ . Finally note that by an application of the triangle inequality,  $\hat{B}_{\text{KL}}(\eta) \subset B(2\eta \text{diam}(\tilde{\Delta}_L(p^*))/\mathbb{E}|X|)$ .

Define the information matrix at  $\tilde{v}^*$ ,  $\mathcal{I} = \mathbb{E}[D^2 l_1(\tilde{v}^*)]$ , and an  $\epsilon' > 0$  less than the smallest eigenvalue of  $\mathcal{I}$  ( $\mathcal{I}$  is positive definite by the strict convexity of  $l_0$  described in theorem [7](#)). Also pick an  $\epsilon'' < \frac{1}{8}\epsilon'$  such that  $\hat{B}_{\text{KL}}(\epsilon''\eta^2) \subset B(\eta)$  for all small  $\eta$ . Now define a sequence  $\eta_N = N^{-(1/4-\epsilon)}$  noting  $\eta_N/h_N \rightarrow 0$ . Let  $|\mathcal{I}|$  denote the determinant of the information matrix.

$$\begin{aligned}
& \left| \log \tilde{m}((X_n)_{n=1}^N | h_N, \theta_N) - \left( -Nl_N(v_N) - \frac{1}{2} \dim \tilde{\Delta}_L(p^*) \log(2\pi N) - \frac{1}{2} \log |\mathcal{I}| + \log \tilde{\pi}(v^* | h_N, \theta_N) \right) \right| \\
& \leq \left| \log \left( \int_{\tilde{\Delta}_L(p^*)} e^{-Nl_N(v)} \tilde{\pi}(v | h_N, \theta_N) \right) - \log \left( \int_{B(\eta_N)} e^{-Nl_N(v)} \tilde{\pi}(v | h_N, \theta_N) \right) \right| \\
& \quad + \left| \log \left( \int_{B(\eta_N)} e^{-Nl_N(v)} \tilde{\pi}(v | h_N, \theta_N) \right) - \log \left( \int_{B(\eta_N)} e^{-Nl_N(v)} \tilde{\pi}(v^* | h_N, \theta_N) \right) \right| \\
& \quad + \left| \log \left( \int_{B(\eta_N)} e^{-Nl_N(v)} \tilde{\pi}(v^* | h_N, \theta_N) \right) - \log \left( \int_{B(v_N, \eta_N)} e^{-Nl_N(v)} \tilde{\pi}(v^* | h_N, \theta_N) \right) \right| \\
& \quad + \left| \log \left( \int_{B(v_N, \eta_N)} e^{-Nl_N(v)} \tilde{\pi}(v^* | h_N, \theta_N) \right) \right. \\
& \quad \left. - \left( -Nl_N(v_N) - \frac{1}{2} \dim \hat{\Delta}_L(p^*) \log(2\pi N) - \frac{1}{2} \log |\mathcal{I}| + \log \tilde{\pi}(v^* | h_N, \theta_N) \right) \right| \\
& \leq \log \left( 1 + \left( \int_{\tilde{\Delta}_L(p^*) \setminus B(\eta_N)} e^{Nl_N(v_N) - Nl_N(v)} \tilde{\pi}(v | h_N, \theta_N) \right) / \left( \int_{B(\eta_N)} e^{Nl_N(v_N) - Nl_N(v)} \tilde{\pi}(v | h_N, \theta_N) \right) \right) \\
& \quad \left| \log \left( \left( \int_{B(\eta_N)} e^{-Nl_N(v)} \frac{\tilde{\pi}(v | h_N, \theta_N)}{\tilde{\pi}(v^* | h_N, \theta_N)} \right) / \left( \int_{B(\eta_N)} e^{-Nl_N(v)} \right) \right) \right| \\
& \quad + \log \left( \left( \int_{B(v_N, \eta_N + \|v_N - v^*\|)} e^{-Nl_N(v)} \right) / \left( \int_{B(v_N, \eta_N - \|v_N - v^*\|)} e^{-Nl_N(v)} \right) \right) \\
& \quad + \left| \log \left( (2\pi)^{-\frac{1}{2} \dim \hat{\Delta}_L(p^*)} |\mathcal{I}|^{-1/2} \int_{\|y\| < \eta_N \sqrt{N}} e^{N(l_N(v_N) - l_N(v_N + y/\sqrt{N}))} \right) \right| \\
& \leq \exp \left( N \sup_{\|v^* - v\| > \eta_N} (l_N(v^*) - l_N(v)) \right) / \left( \int_{\hat{B}_{\text{KL}}(\epsilon''\eta_N^2)} e^{Nl_N(v^*) - Nl_N(v)} \tilde{\pi}(v | h_N, \theta_N) \right) \\
& \quad + \sup_{v \in B(\eta_N)} |\log \tilde{\pi}(v | h_N, \theta_N) - \log \tilde{\pi}(v^* | h_N, \theta_N)| \\
& \quad + \left( \int_{B(v_N, \eta_N + \|v_N - v^*\|) \setminus B(v_N, \eta_N - \|v_N - v^*\|)} e^{-Nl_N(v)} \right) / \left( \int_{B(v_N, \eta_N - \|v_N - v^*\|)} e^{-Nl_N(v)} \right) \\
& \quad + \left| \log \left( (2\pi)^{-\frac{1}{2} \dim \hat{\Delta}_L(p^*)} |\mathcal{I}|^{-1/2} \int_{\|y\| < \eta_N \sqrt{N}} e^{N(l_N(v_N) - l_N(v_N + y/\sqrt{N}))} \right) \right|. \tag{15}
\end{aligned}$$

The third line in this inequality follows since  $B(v_N, \eta_N - \|v_N - v^*\|) \subseteq B(v_N, \eta_N) \cap B(\eta_N)$  and  $B(v_N, \eta_N) \cup B(\eta_N) \subseteq B(v_N, \eta_N + \|v_N - v^*\|)$ . First note that the second term is bounded by  $J\eta_N/h_N$  and thus vanishes a.s.. We will show the rest of these terms also vanish a.s..

To analyze the last term, we will use a simplified proof of a Laplace approximation. First note, given the regularity conditions established in the proof of theorem [7](#) a.s.  $v_N \rightarrow v^*$ , and  $D^2 l_N \rightarrow D^2 E l_N$  locally uniformly. Thus, for each  $y$ , since  $\eta_N \sqrt{N} \rightarrow \infty$ , and  $\eta_N \rightarrow 0$  (so that if  $\|y\| < \eta_N \sqrt{N}$  then  $y/\sqrt{N} \leq \eta_N \rightarrow 0$ ), a.s.

$$\mathbb{1}_{\|y\| < \eta_N \sqrt{N}} e^{N(l_N(v_N) - l_N(v_N + y/\sqrt{N}))} = \mathbb{1}_{\|y\| < \eta_N \sqrt{N}} e^{-\frac{1}{2} y^T D^2 l_N(v_N') y} \rightarrow e^{-\frac{1}{2} y^T \mathcal{I} y},$$

where  $v'_N$  is on a ray connecting  $v_N$  to  $v_N + y/\sqrt{N}$ . As well, eventually,

$$\mathbb{1}_{\|y\| < \eta_N \sqrt{N}} e^{N(l_N(v_N) - l_N(v_N + y/\sqrt{N}))} = \mathbb{1}_{\|y\| < \eta_N \sqrt{N}} e^{-\frac{1}{2}y^T D^2 l_N(v'_N)y} \leq e^{-\frac{1}{4}y^T \mathcal{I}y}.$$

The right hand side is integrable and takes the form of a Gaussian pdf. Thus, integrating the Gaussian pdf, the last term of equation [15] goes to 0 a.s. by the dominated convergence theorem.

To analyze the third term of equation [15], recall from the proof of [7] that  $l_N$  is convex, so, the value of  $-Nl_N$  is less on the annulus  $B(v_N, \eta_N + \|v_N - v^*\|) \setminus B(v_N, \eta_N - \|v_N - v^*\|)$  than on  $B(v_N, \eta_N - \|v_N - v^*\|)$ . Thus, to demonstrate that this term vanishes, it suffices to show that  $\|v_N - v^*\|/\eta_N \rightarrow 0$  a.s.. Recall from the proof of [7] that we showed that a.s.  $v_N \rightarrow v^*$  and  $D^2 l_N$  converges to  $\mathbb{E} D^2 l_1$  uniformly in a neighborhood of  $v^*$ . Thus, eventually, recalling the definition of  $\epsilon'$  as less than the minimal eigenvalue of  $\mathcal{I}$ , and defining  $t \mapsto v_t$  as a linear path from  $v_N$  to  $v^*$ ,

$$\|Dl_N(v^*)\| = \|Dl_N(v^*) - Dl_N(v_N)\| = \left\| \left( \int_0^1 dt D^2 l_N(v_t) \right) (v^* - v_N) \right\| \geq \frac{1}{2} \epsilon' \|v^* - v_N\|.$$

On the other hand, defining  $e_{k,b}$  as above,  $|D_{e_{k,b}-e_{k,b'}} l_1(v^*)| \leq |X|/\inf_{k,b} v_{k,b}^*$  and so,  $D_{e_{k,b}-e_{k,b'}} l_1(v^*)$  is subexponential. Recalling  $\mathbb{E} Dl_1(v^*) = D\mathbb{E} l_1(v^*) = 0$ , using Bernstein's inequality (theorem 2.8.1 in Vershynin [76]),

$$p^*(|D_{e_{k,b}-e_{k,b'}} l_N(v^*)| > \eta_N^2) \leq C \exp(-C' N \eta_N^4) \leq C \exp(-C' N^{4\epsilon}).$$

Since  $\sum_{N=1}^{\infty} C \exp(-C' N^{4\epsilon}) \lesssim \int_0^{\infty} dx \exp(-C' x^{4\epsilon}) < \infty$ , by the Borel-Cantelli lemma, a.s. eventually,  $\|Dl_N(v^*)\| \leq C \eta_N^2$  for some  $C > 0$ . Finally, since  $\eta_N \rightarrow 0$ , we have  $\|v_N - v^*\|/\eta_N \rightarrow 0$  a.s..

To analyze the first term of equation [15] first note that for small enough  $\eta_N$ , recalling that  $\mathbb{E} l_N$  is convex with maximum at  $v^*$ , and by the definition of  $\epsilon'$ , we can Taylor expand around  $v^*$  and find

$$\sup_{\|v^* - v\| > \eta_N} (\mathbb{E} l_N(v^*) - \mathbb{E} l_N(v)) = \sup_{\|v^* - v\| = \eta_N} (\mathbb{E} l_N(v^*) - \mathbb{E} l_N(v)) \leq -1/2 \epsilon' \eta_N^2.$$

We will also show below that a.s. eventually, for all  $v$  away from the boundary (i.e. outside a fixed neighborhood of the boundary),  $|l_N(v) - \mathbb{E} l_N(v)| < \frac{1}{16} \epsilon' \eta_N^2$ . For now, assume that this is the case. So, a.s. eventually,  $\sup_{\|v^* - v\| > \eta_N} (l_N(v^*) - l_N(v)) < -3/8 \epsilon' \eta_N^2$ , by the triangle inequality. Having bounded the numerator, we now turn to the denominator. Note that by equi-continuity, since  $J\eta_N/h_N$  is eventually less than  $\log 2$ ,  $\tilde{\pi}(v|h_N, \theta_N) \geq \frac{1}{2} \tilde{\pi}(v^*|h_N, \theta_N)$  for all  $v \in B(\eta_N)$ . As well, again, by a triangle inequality, a.s. eventually, for all  $v \in B_{\text{KL}}(\epsilon'' \eta_N^2)$ ,  $l_N(v^*) - l_N(v) \geq -\epsilon'' \eta_N^2 - \frac{1}{8} \epsilon' \eta_N^2 \geq -\frac{1}{4} \epsilon' \eta_N^2$ . Recall that the volume of  $\hat{B}_{\text{KL}}(\epsilon'' \eta_N^2)$  is equal to  $C(C' \eta_N^2)^{\dim \tilde{\Delta}_L(p^*)}$  for some  $C, C' > 0$ . Then the first term of equation [15] is bounded above by

$$2C \exp \left( -\frac{1}{8} \epsilon' N \eta_N^2 + 2 \dim \tilde{\Delta}_L(p^*) \log(\eta_N^{-1}) - \log \tilde{\pi}(v^*|h_N, \theta_N) \right)$$

for some  $C > 0$ . This expression goes to 0 as  $\log \tilde{\pi}(v^*|h_N, \theta_N)/\sqrt{N}$  is bounded below and thus  $\liminf \log \tilde{\pi}(v^*|h_N, \theta_N)/N^{1/2+2\epsilon} = 0$ .

We now show that a.s. eventually, for all  $v$  away from the boundary,  $|l_N(v) - \mathbb{E} l_N(v)| < \frac{1}{16} \epsilon' \eta_N^2$ . First write

$$D_{e_{k,b}-e_{k,b'}} l_N(v) = \frac{1}{N} \#(k, b) v_{k,b}^{-1} - \frac{1}{N} \#(k, b') v_{k,b'}^{-1}$$

which is almost surely eventually bounded by the strong law of large numbers for all  $v$  away from the boundary of  $\tilde{\Delta}_L(p^*)$ . The derivatives of  $\mathbb{E} l_N$  with respect to  $v$  are similarly bounded away from the boundary; say the derivatives of both functions are eventually bounded by  $J'$ . Also note that the random variables  $|l_1(v)(X)| \leq C''|X|$  are uniformly sub-exponential for all  $v$  away from the boundary. The covering number of  $\tilde{\Delta}_L(p^*)$  by balls

of radius  $\frac{1}{64}J'^{-1}\epsilon'\eta_N^2$  is  $\lesssim \eta_N^{-2\dim \hat{\Delta}_L(p^*)}$ . Say  $(v_i)_i$  are centers of the balls of such a covering. By uniform sub-exponentiality and Bernstein's inequality (theorem 2.8.1 in Vershynin [76]), for small enough  $\eta_N$ ,  $P(|l_N(v_i) - \mathbb{E}l_N(v_i)| > \frac{1}{32}\epsilon'\eta_N^2) \lesssim \exp(-CN\eta_N^4) = \exp(-CN^{4\epsilon})$  for some  $C > 0$ . Now, for some  $C, C' > 0$ ,

$$\begin{aligned}
& \sum_{N=0}^{\infty} P(\text{there is a } v_i \text{ such that } |l_N(v_i) - \mathbb{E}l_N(v_i)| > \frac{1}{32}\epsilon'\eta_N^2) \\
& \leq \sum_{N=0}^{\infty} \sum_i P(|l_N(v_i) - \mathbb{E}l_N(v_i)| > \frac{1}{32}\epsilon'\eta_N^2) \\
& \lesssim \sum_{N=0}^{\infty} \exp\left(-CN^{4\epsilon} - 2\dim \hat{\Delta}_L(p^*) \log \eta_N\right) \\
& \lesssim \sum_{N=0}^{\infty} \exp(-C'N^{4\epsilon}) \\
& \lesssim \int_0^{\infty} dx \exp(-C'x^{4\epsilon}) < \infty.
\end{aligned} \tag{16}$$

By the Borel-Cantelli lemma,  $|l_N(v_i) - \mathbb{E}l_N(v_i)| \leq \frac{1}{32}\epsilon'\eta_N^2$  for all  $i$  a.s. eventually. Thus, eventually, by the triangle inequality and the a.s. eventual boundedness of the derivatives of  $l_N$  and  $\mathbb{E}l_N$ ,  $|l_N(v) - \mathbb{E}l_N(v)| \leq \frac{1}{16}\epsilon'\eta_N^2$  for all  $v$  away from the boundary a.s. eventually.  $\square$

We now focus on the behavior of not just any sequence of  $h_N, \theta_N$ , but rather specifically on  $h_N, \theta_N$  which maximize the marginal likelihood.<sup>3</sup> The next two results both use a proof by contradiction strategy that relies on the following logic.

*Remark 2.* Fix  $h, \theta$ . We showed in theorem [7] that  $\log r_N(h, \theta) = O(\log N)$  a.s. and we can conclude from theorem [12] that  $\log \tilde{m}((X_n)_{n=1}^N | h, \theta) = -Nl_N(v_N) - O(\log(N))$ . Thus,  $m((X_n)_{n=1}^N | h, \theta) = -Nl_N(v_N) - O(\log(N))$ . On the other hand, for any  $h', \theta'$ ,  $\log r_N(h', \theta') \leq 0$  and  $\log \tilde{m}((X_n)_{n=1}^N | h', \theta') \leq -Nl_N(v_N)$ . Thus for the maximizers of  $m$ ,  $h_N, \theta_N$ , it is a contradiction if  $\log r_N(h_N, \theta_N) \lesssim -N^\beta$  or  $\log \tilde{m}((X_n)_{n=1}^N | h_N, \theta_N) \leq -Nl_N(v_N) - CN^\beta$  for any  $\beta > 0$ : say  $\log \tilde{m}(h_N, \theta_N) \leq -Nl_N(v_N) - N^\beta$ . Then, for some  $C > 0$ ,  $-C\log(N) \leq m((X_n)_{n=1}^N | h, \theta) + Nl_N(v_N) \leq m((X_n)_{n=1}^N | h_N, \theta_N) + Nl_N(v_N) \leq \log \tilde{m}((X_n)_{n=1}^N | h_N, \theta_N) + Nl_N(v_N) \leq -CN^\beta$ , a contradiction. On the other hand, say  $\log r_N(h_N, \theta_N) \lesssim -N^\beta$ . Then  $-C\log(N) \leq m((X_n)_{n=1}^N | h, \theta) + Nl_N(v_N) \leq m((X_n)_{n=1}^N | h_N, \theta_N) + Nl_N(v_N) \leq \log r_N(h_N, \theta_N) \leq -C'N^\beta$ , also a contradiction.

**Proposition 13.** Say  $(h_N)_N$  and  $(\theta_N)_N$  are sequences maximizing  $\log m((X_n)_{n=1}^N | h_N, \theta_N)$  for each  $N$ . Then a.s. there is no subsequence  $(h_{N_j})_j$  and  $(\theta_{N_j})_j$  such that for some  $\epsilon > 0$ ,  $h_{N_j}N_j^{1/4-\epsilon} \rightarrow \infty$  and for some  $\beta > 0$ ,  $\lim \log \tilde{\pi}(v^* | h_{N_j}, \theta_{N_j})/N_j^\beta < 0$ .

*Proof.* Assume the opposite. Define  $(v_N)_N$  and pick  $(\eta_N)_N, \epsilon'$  as in theorem [12] such that a.s. eventually, for all  $v$  away from the boundary,  $|l_N(v) - \mathbb{E}l_N(v)| < \frac{1}{16}\epsilon'\eta_N^2$ ,  $\eta_{N_j}/h_{N_j} \rightarrow 0$ , and  $\inf_{\|v^*-v\|>\eta_N} \mathbb{E}l_N(v) \geq \mathbb{E}l_N(v_N) + \frac{1}{2}\epsilon'\eta_N^2$ . Then, eventually,

$$\begin{aligned}
& \int_{B(\eta_{N_j})^C} e^{-N_j l_{N_j}(v)} \tilde{\pi}(v | h_{N_j}, \theta_{N_j}) \leq \exp\left(-N_j \inf_{\|v^*-v\|>\epsilon} l_{N_j}(v)\right) \\
& \leq \exp\left(-N_j(l_{N_j}(v_{N_j}) + \frac{3}{8}\epsilon'\eta_{N_j}^2)\right) \\
& \leq \exp\left(-N_j l_{N_j}(v_{N_j}) - \frac{3}{8}\epsilon'N_j^{1/4}\right).
\end{aligned} \tag{17}$$

<sup>3</sup>It is not crucial that maximizers of the marginal likelihood exist for any of the result below: the results below hold assuming only that  $h_N, \theta_N$  are approximate maximizers, i.e.  $\log m((X_n)_{n=1}^N | h_N, \theta_N) = \sup_{h, \theta} \log m((X_n)_{n=1}^N | h, \theta) + o(1)$  or in slightly altered form swapping the  $o(1)$  for  $o_P(1)$ .



where  $B(\eta_{N_j})^C$  denotes the complement of  $B(\eta_{N_j})$ . On the other hand, by equi-continuity of the prior density, since  $\eta_{N_j}/h_{N_j}$  becomes small, for some  $C > 0$

$$\begin{aligned} \int_{B(\eta_{N_j})^C} e^{-N_j l_{N_j}(v)} \tilde{\pi}(v|h_{N_j}, \theta_{N_j}) &\lesssim \exp(-N_j l_{N_j}(v_{N_j}) + \log \tilde{\pi}(v^*|h_{N_j}, \theta_{N_j}) + \dim \tilde{\Delta}_L(p^*) \log(\eta_{N_j})) \\ &\leq \exp(-N_j l_{N_j}(v_{N_j}) - C N_j^\beta + O(\log N_j)) \end{aligned} \quad (18)$$

for some  $C > 0$ . By remark 2, this completes the proof.  $\square$

We have so far explored what happens to the marginal likelihood when  $h_N$  does not converge quickly to 0, showing that it satisfies a Laplace-like approximation in this case. Next we show that  $h_N$  will in fact converge to zero quickly only if the estimated autoregressive model  $f(\theta_N)$  converges to the optimal parameter value  $v^*$ .

For a sequence  $(\theta_N)_N$  define, for  $k \in \text{acc}_L(p^*)$ ,  $\sigma_{N,k} = \sum_{b \in \text{supp}_L(p^*)|_k} f_{k,b}(\theta_N)$  and  $\lambda_{N,k} = 1 - \sigma_{N,k}$ .

**Proposition 14.** *Say  $(h_N)_N$  and  $(\theta_N)_N$  are sequences maximizing  $\log m(\{X_n\}_{n=1}^N | h_N, \theta_N)$ . Then a.s.,  $\limsup h_{N_j} N_j^\beta < \infty$  for some  $\beta > 0$  along a subsequence  $(N_j)_j$  only if  $f_{k,b}(\theta_{N_j}) \rightarrow v_{k,b}^*$  for all  $k, b \in \text{supp}_L(p^*)$ .*

*Proof.* Take a subsequence such that:  $h_{N_j} \rightarrow 0$ ;  $h_{N_j} N_j^\beta$  and  $h_{N_j} N_j$  both converge, the latter possibly to  $\infty$ ;  $f_{k,b}(\theta_{N_j})$  converges for all  $k, b$ ; and  $f_{k,b}(\theta_{N_j})/h_{N_j}$  converges, possibly to  $\infty$ , for all  $k, b$ . Note since  $[0, \infty]$  is compact, every subsequence with  $\limsup h_{N_j} N_j^\beta < \infty$  has a further subsequence with these properties. Thus it will be sufficient to show that  $f_{k,b}(\theta_{N_j}) \rightarrow v_{k,b}^*$  for all  $k \in \text{acc}_L(p^*), b \in \tilde{\mathcal{B}}$ . Now define  $\lambda_k = \lim \lambda_{N_j,k}$  and  $\sigma_k$  similarly for all  $k \in \text{acc}_L(p^*)$ .

The proof will proceed in two parts. First we will show that if  $\lambda_k \neq 0$  for some  $k \in \text{acc}(p^*)$ , then  $\log r_{N_j}(h_{N_j}, \theta_{N_j}) \lesssim -N_j^{\beta'}$  for some  $\beta' > 0$ . This is a contradiction by remark 2 so that  $\lambda_k = 0$  and  $\sigma_k = 1$  for all  $k$ . Then we will show that if  $f_{k,b}(\theta_{N_j}) \not\rightarrow v_{k,b}^*$  for any  $k, b \in \text{supp}_L(p^*)$ , eventually  $\sup_{v \in B(\eta)} \log \tilde{\pi}(v|h_{N_j}, \theta_{N_j}) \lesssim -N_j^{\beta''} (\|f(\theta_{N_j}) - v^*\| - \eta)^2$  for some  $\beta'' > 0$  for small  $\eta$ . Assume this is the case for now. By similar logic to that in equation 17 of proposition 13, for small fixed  $\eta$ , it can be seen that for some  $\beta''', C, C' > 0$ ,

$$\log \int_{B(\eta)^C} e^{-N_j l_{N_j}(v)} \tilde{\pi}(v|h_{N_j}, \theta_{N_j}) \leq -N_j l_{N_j}(v_{N_j}) - C N_j^{\beta'''}.$$

As well,

$$\begin{aligned} \log \int_{B(\eta)} e^{-N_j l_{N_j}(v)} \tilde{\pi}(v|h_{N_j}, \theta_{N_j}) &\leq -N_j l_{N_j}(v_{N_j}) + \sup_{\|v^* - v\| < \eta} \log \tilde{\pi}(v | h_{N_j}, \theta_{N_j}) \\ &\leq -N_j l_{N_j}(v_{N_j}) - C' N_j^{\beta''}. \end{aligned}$$

using the fact that  $\log \tilde{\pi}(v|h_{N_j}, \theta_{N_j}) \lesssim -N_j^{\beta''}$ . This is also a contradiction by remark 2 and the statement of the theorem follows.

Part one: Assume that for some  $k'$ ,  $\lambda_{k'} > 0$ . Performing the Stirling approximation on the terms of  $\log r_{N_j}$  depends on the behavior of  $\sigma_{N_j,k}/h_{N_j}$ . Based on the properties of the subsequence we chose, this quantity converges. If it converges to a number greater than or equal to 1 we can perform the usual Stirling approximation with  $O(1)$  error. On the other hand, if  $\sigma_{N_j,k}/h_{N_j}$  has limit less than 1, using the properties of the Gamma function we write

$$\begin{aligned} \log \Gamma\left(\frac{\sigma_{N_j,k}}{h_{N_j}}\right) &= -\log\left(\frac{\sigma_{N_j,k}}{h_{N_j}}\right) + \log \Gamma\left(1 + \frac{\sigma_{N_j,k}}{h_{N_j}}\right) \\ &= \left(\frac{\sigma_{N_j,k}}{h_{N_j}} - 1\right) \log\left(\frac{\sigma_{N_j,k}}{h_{N_j}}\right) - \frac{\sigma_{N_j,k}}{h_{N_j}} + O(1) \end{aligned} \quad (19)$$

where additional  $O(1)$  terms were added explicitly in the second line so that the approximation is similar in form to the usual Stirling approximation with the exception of a 1 in the first term instead of  $1/2$ . Define  $\gamma_k = 1/2$  if the limit of  $\frac{\sigma_{N_j,k}}{h_{N_j}}$  is greater than or equal to 1 and 1 otherwise. Finally recall that  $h_{N_j} \rightarrow 0$  and write

$$\begin{aligned}
\log r_{N_j}(h_{N_j}, \theta_{N_j}) &= \sum_{k \in \text{acc}_L(p^*)} \left[ \log \frac{\Gamma\left(\frac{1}{h_{N_j}}\right)}{\Gamma\left(\frac{1}{h_{N_j}} + \#k\right)} - \log \frac{\Gamma\left(\frac{\sigma_{N_j,k}}{h_{N_j}}\right)}{\Gamma\left(\frac{\sigma_{N_j,k}}{h_{N_j}} + \#k\right)} \right] \\
&= \sum_{k \in \text{acc}_L(p^*)} \left[ \left(\frac{1}{h_{N_j}} - \frac{1}{2}\right) \log\left(\frac{1}{h_{N_j}}\right) \right. \\
&\quad - \left(\frac{1}{h_{N_j}} + \#k - \frac{1}{2}\right) \log\left(\frac{1}{h_{N_j}} + \#k\right) \\
&\quad - \left(\frac{\sigma_{N_j,k}}{h_{N_j}} - \gamma_k\right) \log\left(\frac{\sigma_{N_j,k}}{h_{N_j}}\right) \\
&\quad \left. + \left(\frac{\sigma_{N_j,k}}{h_{N_j}} + \#k - \frac{1}{2}\right) \log\left(\frac{\sigma_{N_j,k}}{h_{N_j}} + \#k\right) \right] + O(1) \\
&= \sum_{k \in \text{acc}_L(p^*)} \left[ -\frac{\lambda_{N_j,k}}{h_{N_j}} \log(1 + h_{N_j} \#k) \right. \\
&\quad - \left(\frac{\sigma_{N_j,k}}{h_{N_j}} - \frac{1}{2}\right) \log(\sigma_{N_j,k}) \\
&\quad \left. + \left(\frac{\sigma_{N_j,k}}{h_{N_j}} + \#k - \frac{1}{2}\right) \log\left(\frac{\sigma_{N_j,k} + \#k h_{N_j}}{1 + \#k h_{N_j}}\right) \right] \tag{20} \\
&\quad + \sum_{k \in \text{acc}_L(p^*)} (\gamma_k - 1/2) \log\left(\frac{\sigma_{N_j,k}}{h_{N_j}}\right) + O(1) \\
&= \sum_{k \in \text{acc}_L(p^*)} \frac{1}{h_{N_j}} \left[ -\lambda_{N_j,k} \log(1 + \#k h_{N_j}) - \sigma_{N_j,k} \log(\sigma_{N_j,k}) \right. \\
&\quad \left. + (\sigma_{N_j,k} + \#k h_{N_j}) \log\left(\frac{\sigma_{N_j,k} + \#k h_{N_j}}{1 + \#k h_{N_j}}\right) \right] \\
&\quad + \sum_{\sigma_{N_j,k}/h_{N_j} \rightarrow 0} (\gamma_k - 1/2) \log\left(\frac{\sigma_{N_j,k}}{h_{N_j}}\right) + O(1) \\
&\leq \sum_{k \in \text{acc}_L(p^*)} \frac{1}{h_{N_j}} \left[ -\lambda_{N_j,k} \log(1 + \#k h_{N_j}) - \sigma_{N_j,k} \log(\sigma_{N_j,k}) \right. \\
&\quad \left. + (\sigma_{N_j,k} + \#k h_{N_j}) \log\left(\frac{\sigma_{N_j,k} + \#k h_{N_j}}{1 + \#k h_{N_j}}\right) \right] + O(1)
\end{aligned}$$

The function

$$x \mapsto -\lambda_{N_j,k} \log(1+x) - \sigma_{N_j,k} \log(\sigma_{N_j,k}) + (\sigma_{N_j,k} + x) \log\left(\frac{\sigma_{N_j,k} + x}{1+x}\right)$$

has intercept 0, and derivative  $\log\left(\frac{\sigma_{N_j,k} + x}{1+x}\right)$ , and is thus convex since the derivative is increasing (Fig S2). As  $x \rightarrow \infty$ , the function is  $-\lambda_{N_j,k} \log x + O(1)$  while the function has tangent  $x \mapsto x \log \sigma_{N_j,k}$  at  $x = 0$ . In our case, we evaluate at  $x = h_{N_j} N_j$ , which, based on the chosen subsequence, is either bounded or goes to infinity. First assume  $h_{N_j} N_j$  is bounded, say by  $M$ , and recall that we assumed  $\lambda_{k'} > 0$  for some  $k'$ , so  $\sigma_{k'} < 1$ . Then, because the

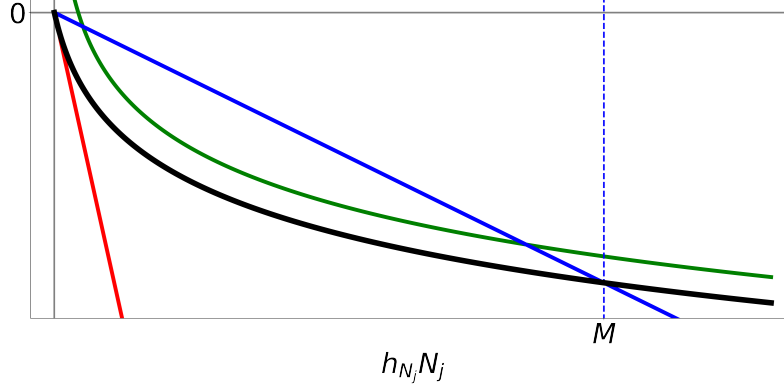

Figure S2: Graph of the function evaluated at  $h_{N_j} N_j$  in black when  $\sigma_{N_j,k} < 1$ . The red line shows the tangent at 0 with slope  $\log(\sigma_{N_j,k}) < 0$ . The blue line shows that in this case, where  $\sigma_{N_j,k} < 1$ , the function may be dominated by some line for all values less than  $M$ . The green line shows that as  $h_{N_j} N_j \rightarrow \infty$ , the function is  $-\lambda_{N_j,k} \log(h_{N_j} N_j) + O(1)$ .

function is decreasing and eventually has negative derivative at 0, we can eventually bound it on  $[0, M]$  by a line with negative slope and intercept 0 (Fig S2), so eventually, for some  $C, C' > 0$ ,

$$\log r_{N_l}(h_{N_j}, \theta_{n_l}) \leq -C \frac{1}{h_{N_j}} N_j h_{N_j} + C' \lesssim -N_j.$$

Otherwise  $h_{N_j} N_j \rightarrow \infty$  so, by the above remark about the limits of the function as  $x \rightarrow \infty$ ,

$$\log r_{N_l}(h_{N_j}, \theta_{n_l}) \leq -\frac{1}{2h_{N_j}} \log(h_{N_j} N_j) \sum_{k \in \text{acc}_L(p^*)} \lambda_{N_j,k} + C$$

for some  $C > 0$  eventually. Recalling that  $h_{N_j} N_j^\beta$  is eventually bounded above, and by assumption  $\log(h_{N_j} N_j) \rightarrow \infty$ ,

$$\log r_{N_l}(h_{N_j}, \theta_{n_l}) \lesssim -N_j^\beta \frac{\log(h_{N_j} N_j)}{h_{N_j} N_j^\beta} \max_k \lambda_k \lesssim -N_j^\beta \max_k \lambda_k.$$

This completes part one of the proof.

Part two: Assume  $\|f_{k,b}(\theta_{N_j}) - \tilde{v}_k\| \not\rightarrow 0$ . We will perform the same technique to allow a Stirling approximation of the prior: define  $\gamma_{k,b} = 1/2$  if the limit of  $f_{k,b}(\theta_{N_j})/h_{N_j}$  is greater than or equal to 1 and 1 otherwise. Then, for all  $v \in \tilde{\Delta}_L(p^*)$  away from the boundary,

recalling that we showed in part 1  $\sigma_{N_j,k} \rightarrow 1$  for all  $k$ , if  $\frac{f_k(\theta_{N_j})}{\sigma_{N_j,k}} \neq v_k$  for some  $k$ ,

$$\begin{aligned}
\log \tilde{\pi}(v|h_{N_j}, \theta_{N_j}) &= \sum_k \log \Gamma \left( \frac{\sigma_{N_j,k}}{h_{N_j}} \right) \\
&\quad - \sum_{b \in \text{supp}_L(p^*)|_k} \left[ \log \Gamma \left( \frac{1}{h_{N_j}} f_{k,b}(\theta_{N_j}) \right) - \frac{1}{h_{N_j}} f_{k,b}(\theta_{N_j}) \log v_{k,b} \right] + O(1) \\
&= \sum_k \left( \frac{\sigma_{N_j,k}}{h_{N_j}} - 1/2 \right) \log \left( \frac{\sigma_{N_j,k}}{h_{N_j}} \right) \\
&\quad - \sum_{b \in \text{supp}_L(p^*)|_k} \left[ \left( \frac{1}{h_{N_j}} f_{k,b}(\theta_{N_j}) - \gamma_{k,b} \right) \log \left( \frac{1}{h_{N_j}} f_{k,b}(\theta_{N_j}) \right) \right. \\
&\quad \left. - \frac{1}{h_{N_j}} f_{k,b}(\theta_{N_j}) \log v_{k,b} \right] + O(1) \\
&= \frac{1}{2} \dim \tilde{\Delta}_L(p^*) \log \left( \frac{1}{h_{N_j}} \right) - \frac{1}{h_{N_j}} \sum_k \sigma_{N_j,k} \text{KL} \left( \frac{f_k(\theta_{N_j})}{\sigma_{N_j,k}} \left\| v_k \right\| \right) \\
&\quad + \sum_{k,b \text{ s.t. } \gamma_{k,b}=1} \left( \gamma_{k,b} - \frac{1}{2} \right) \log \left( \frac{1}{h_{N_j}} f_{k,b}(\theta_{N_j}) \right) + O(1) \\
&\lesssim - \frac{1}{h_{N_j}} \sum_k \text{KL} \left( \frac{f_k(\theta_{N_j})}{\sigma_{N_j,k}} \left\| v_k \right\| \right). \tag{21}
\end{aligned}$$

Now note  $h_{N_j} \lesssim N^{-\beta}$  and for any norm  $\|\cdot\|$ , by Pinsker's inequality,

$$\sum_k \text{KL} \left( \frac{f_k(\theta_{N_j})}{\sigma_{N_j,k}} \left\| v_k \right\| \right) \gtrsim \sum_k \left\| \frac{f_k(\theta_{N_j})}{\sigma_{N_j,k}} - v_k \right\|^2.$$

One may check that  $(\sum_k \|\cdot\|^2)^{1/2}$  is also a norm and  $\sigma_{N_j,k} \rightarrow 1$  for all  $k$ , so

$$\sum_k \text{KL} \left( \frac{f_k(\theta_{N_j})}{\sigma_{N_j,k}} \left\| v_k \right\| \right) \gtrsim \|f(\theta_{N_j}) - v\|^2 + o(1)$$

for any norm  $\|\cdot\|$ . Now note if  $\eta < \|f(\theta_{N_j}) - v^*\|$ ,

$$\sup_{v \in B(\eta)} \log \tilde{\pi}(v|h_{N_j}, \theta_{N_j}) \lesssim -N_j^\beta (\|f(\theta_{N_j}) - v^*\| - \eta)^2.$$

This concludes part two.  $\square$

We now have the tools to determine the behavior of  $h_N$  and  $f(\theta_N)$  in the well and misspecified cases.

### F.1 The well-specified case

We now examine the asymptotic behavior of empirical Bayes inference for the BEAR model in the well-specified case, or, more precisely, when the model is well-specified “at resolution  $L$ ”, in the sense that there are  $\tilde{\theta}_N$  such that for all  $k, b \in \text{supp}_L(p^*)$ ,  $f_{k,b}(\tilde{\theta}_N) \rightarrow v_{k,b}^*$  (we say the model is misspecified at resolution  $L$  otherwise). We first show that the misspecification diagnostic is guaranteed to converge to zero ( $h_N \rightarrow 0$ ), correctly indicating that the model is well-specified, and that the embedded AR model converges to the true transition probabilities ( $f(\theta_N) \rightarrow v^*$ ). We also give a bound on the rate for the convergence of  $h_N$ , a power of the dataset size. We then establish additional weak conditions under which  $\theta_N$  also converges to the true value  $\theta^*$ .

**Proposition 15.** *Say the model is well-specified and  $(h_N)_N$  and  $(\theta_N)_N$  are sequences maximizing  $\log m(\{X_n\}_{n=1}^N | h_N, \theta_N)$ . Then  $h_N N^{1/4-\epsilon} \rightarrow 0$  for every  $\epsilon > 0$  and  $f_{k,b}(\theta_N) \rightarrow v_{k,b}^*$  for all  $k, b \in \text{supp}_L(p^*)$  with both sequences converging in probability.*

*Proof.* If  $U$  is a neighborhood of  $v^*$  and  $\beta > 0$ , proposition 14 shows that

$$p^*(h_N < N^{-\beta}, f(\theta_N) \notin U) \rightarrow 0$$

(otherwise  $p^*(h_N < N^{-\beta}, f(\theta_N) \notin U$  for infinitely many  $N$ )  $> 0$ ). We show below that  $p^*(h_N \geq N^{-1/4+\epsilon}) \rightarrow 0$  for any  $\epsilon > 0$  and it will thus follow that we also get  $f(\theta) \rightarrow v^*$  in probability.

Proposition 13 shows that

$$p^*(h_N \geq N^{-1/4+\epsilon}, \log \tilde{\pi}(v^* | h_N, \theta_N) < -\sqrt{N}) \rightarrow 0$$

as  $h_N \leq N^{-1/4+\epsilon}$  if and only if  $h_N N^{1/4-\epsilon/2} \geq N^{\epsilon/2}$ . Thus it is sufficient to show that

$$p^*(h_N \geq N^{-1/4+\epsilon}, \log \tilde{\pi}(v^* | h_N, \theta_N) \geq -\sqrt{N}) \rightarrow 0.$$

On this set, we may apply theorem 12, but we will need to control  $\log \tilde{\pi}(v^* | h, \theta)$ .

For any  $h, \theta$ , defining  $\gamma_{k,b} = 1$  if  $\frac{1}{h} f_{k,b}(\theta) < 1$  and  $1/2$  otherwise, and  $\hat{\gamma}_k = 1$  if  $\frac{\sigma_k}{h} < 1$  (where recall  $\sigma_k = \sum_{b \in \text{supp}_L(p^*)|_k} f_{k,b}(\theta)$ ) and  $1/2$  otherwise, by the same derivation as equation 21,

$$\begin{aligned} \log \tilde{\pi}(v^* | h, \theta) &= \frac{1}{2} \dim \tilde{\Delta}_L(p^*) \log \left( \frac{1}{h} \right) - \frac{1}{h} \sum_k \sigma_{k, \text{KL}} \left( \frac{f_k(\theta)}{\sigma_{N_j, k}} \middle\| v_k^* \right) \\ &\quad + \sum_{k, b \text{ s.t. } \gamma_{k,b}=1} \left( \gamma_{k,b} - \frac{1}{2} \right) \log \left( \frac{1}{h} f_{k,b}(\theta) \right) \\ &\quad - \sum_{k, \text{ s.t. } \hat{\gamma}_k=1} \left( \hat{\gamma}_k - \frac{1}{2} \right) \log \left( \frac{\sigma_k}{h} \right) + O(1) \end{aligned} \quad (22)$$

where  $O(1)$  is uniform over  $h$  or  $\theta$ . Since  $\hat{\gamma}_k = 1$  only if  $\gamma_{k,b} = 1$  for all  $b \in \text{supp}_L(p^*)|_k$ , by the concavity of the log function, the sum of these last two terms is negative. Thus,

$$\log \tilde{\pi}(v^* | h, \theta) \leq \frac{1}{2} \dim \tilde{\Delta}_L(p^*) \log \left( \frac{1}{h} \right) + C \quad (23)$$

for all  $h, \theta$  for some  $C > 0$ .

Now we derive a lower bound for  $\tilde{m}((X_n)_{n=1}^N | h_N, \theta_N)$ . Pick  $\tilde{\theta}_j$  such that for all  $k, b \in \text{supp}_L(p^*)$ ,  $f_{k,b}(\tilde{\theta}_j) \rightarrow v_{k,b}^*$ . Thus,  $\tilde{\pi}(\cdot | h, \tilde{\theta}_j) \rightarrow \prod_{k \in \text{acc}_L(p^*)} \text{Dirichlet}(\frac{1}{h} v_{k,b}^*)_{b \in \text{supp}_L(p^*)|_k}$  for any  $h > 0$  in distribution. And as  $h \rightarrow 0$ , we also have  $\prod_{k \in \text{acc}_L(p^*)} \text{Dirichlet}(\frac{1}{h} v_{k,b}^*)_{b \in \text{supp}_L(p^*)|_k} \rightarrow \delta_{v^*}$ . So, pick a sequence  $\tilde{\theta}'_j, \tilde{h}_j$  such that  $\tilde{\pi}(\cdot | \tilde{h}_j, \tilde{\theta}'_j) \rightarrow \delta_{v^*}$  in distribution.<sup>4</sup> Then  $\log m((X_n)_{n=1}^N | \tilde{h}_j, \tilde{\theta}'_j) \rightarrow -N l_N(v^*)$ . Thus,  $\log m((X_n)_{n=1}^N | h_N, \theta_N) \geq -N l_N(v^*)$ . Also recall that from the proof of theorem 7 that, defining  $Z_N = N l_N(v_N) - N l_N(v^*)$ ,  $Z_N$  converges in distribution (to a chi-squared distribution). Since  $\log r_N \leq 0$  we can write

$$\log \tilde{m}((X_n)_{n=1}^N | h_N, \theta_N) \geq -N l_N(v_N) + Z_N. \quad (24)$$

Now, when both  $h_N \geq N^{-1/4+\epsilon}$ ,  $\log \tilde{\pi}(v^* | h_N, \theta_N) \geq -\sqrt{N}$ , applying theorem 12, we've shown that with probability going to 1, for some fixed  $C > 0$ ,

$$\log \tilde{m}((X_n)_{n=1}^N | h_N, \theta_N) \leq -N l_N(v_N) - \frac{1}{2} \dim \hat{\Delta}_L(p^*) \log N + \frac{1}{2} \dim \tilde{\Delta}_L(p^*) \log \left( \frac{1}{h} \right) + C.$$

<sup>4</sup>Since  $\tilde{\Delta}_L(p^*)$  is compact, the set of polynomials with rational coefficients,  $(g_i)_{i=1}^\infty$  is dense in the space of continuous functions under the infinite norm. Pick  $\tilde{h}_j$  to have  $|g_i(v^*) - \int g_i d \prod_{k \in \text{acc}_L(p^*)} \text{Dirichlet}(\frac{1}{h} v_{k,b}^*)_{b \in \text{supp}_L(p^*)|_k}| < 1/j$  for all  $i \leq j$  and then  $\tilde{\theta}'_j$  to have  $|\int g_i d \prod_{k \in \text{acc}_L(p^*)} \text{Dirichlet}(\frac{1}{h} v_{k,b}^*)_{b \in \text{supp}_L(p^*)|_k} - \int g_i d \tilde{\pi}(\cdot | h_j, \tilde{\theta}'_j)| < 1/j$  for all  $i \leq j$ .

Thus, as  $h_N \geq N^{-1/4+\epsilon}$ ,

$$\begin{aligned} -\frac{1}{4} \dim \hat{\Delta}_L(p^*) \log N + C &\geq -\frac{1}{2} \dim \hat{\Delta}_L(p^*) \log N + (1/4 - \epsilon) \frac{1}{2} \dim \tilde{\Delta}_L(p^*) \log N + C \\ &\geq \log \tilde{m}((X_n)_{n=1}^N | h_N, \theta_N) + Nl_N(v_N) \\ &\geq Z_N. \end{aligned} \tag{25}$$

Since  $Z_N$  converges in distribution, this occurs with vanishing probability.  $\square$

We have thus far discussed the asymptotic behavior of  $h_N$  and  $f(\theta_N)$ . To draw conclusions about  $\theta_N$  itself, we need to place some assumptions on the autoregressive function  $f$ . Here we provide an example of such assumptions, drawn from the theory of M-estimators, which say in essence that  $f$  must have an isolated peak at  $\theta^*$ . These assumptions are enough to guarantee that the empirical Bayes estimate of the AR model parameter  $\theta$  converges to the true value  $\theta^*$ .

**Corollary 16.** *Say  $\theta^* \in \Theta$  and  $d$  is a metric on  $\Theta$  such that  $f_{k,b}(\theta^*) = v_{k,b}^*$  for all  $k, b \in \text{supp}_L(p^*)$  and for all  $\delta > 0$ ,*

$$0 < \inf_{d(\theta, \theta^*) > \delta} \|f(\theta) - v^*\|.$$

*Then  $\theta_N \rightarrow \theta^*$  in probability.*

*Proof.* Since by proposition 15 we have  $\|f(\theta_N) - v^*\| = o_P(1)$ , we may apply theorem 5.7 of van der Vaart 75 to get the result.  $\square$

Taking a step back, a perhaps surprising aspect of these results is the weak conditions on  $f$ . Were we, instead of trying to diagnose misspecification in the AR model, simply trying to analyze uncertainty in the AR model's parameter estimate, we might proceed by putting a prior on  $\theta$  and performing Bayesian inference for the AR model. In this case, to guarantee asymptotic normality and well-calibrated frequentist coverage, we would in general need strong conditions on  $f$ , such as bounded third derivatives 47. Intuitively, the task of diagnosing misspecification might seem to be harder than describing parameter uncertainty, but our conditions on  $f$  in this section and the next are in fact much weaker, involving no restrictions on the derivatives of  $f$  whatsoever.

## F.2 The misspecified case

We now consider the case where the AR model is misspecified at resolution  $L$ . In this case, we can rewrite the marginal likelihood of the BEAR model (using propositions 13 and 14 to apply theorem 12) as

$$\log m((X_n)_{n=1}^N | h_N, \theta_N) = -Nl_N(v_N) - \frac{1}{2} \dim \tilde{\Delta}_L(p^*) \log N + C_{v^*} - \mathcal{L}_N(h_N, \theta_N) + o(1)$$

where we define  $\mathcal{L}_N(h_N, \theta_N) = -\log \tilde{\pi}(v^* | h, \theta) - r_N(h, \theta)$ .<sup>5</sup> This expression for the marginal likelihood takes the form of a modified Laplace approximation where, instead of the original prior  $\pi$  evaluated at the true parameter value, we have the prior over the support of the data,  $\tilde{\pi}(v^* | h, \theta)$ , as well as the additional term  $r_N$ , which is  $O(\log N)$  rather than  $O(1)$  and depends on the concentration of the prior outside the support of the data. Instead of the standard empirical Bayes behavior described by Petrone et al. 54, wherein the prior probability of the true parameters is maximized, we instead heuristically expect that the objective function  $\mathcal{L}_N(h, \theta)$  is minimized. The following result makes this intuition formal, showing that  $h_N$  and  $\theta_N$  indeed behave similarly to the minimizers of  $\mathcal{L}_N$ .

**Corollary 17.** *If the model is misspecified at resolution  $L$ , a.s.  $\mathcal{L}_N(h_N, \theta_N) = \sup_{h, \theta} \mathcal{L}_N(h, \theta) - o(1)$ .*

<sup>5</sup> $\mathcal{L}_N$  is stochastic due to  $r_N$ , but since  $h_N N^\beta \rightarrow \infty$  for any  $\beta > 0$ , using the expansion in equation 20 one may show that the  $\#k$  in  $r_N$  can be replaced with  $N\mathbb{E}\#k$  incurring only a penalty of  $O_P(N^{-1/2+\epsilon})$ .



*Proof.* Say  $\hat{h}_N, \hat{\theta}_N$  are sequences such that  $\mathcal{L}_N(\hat{h}_N, \hat{\theta}_N) = \sup_{h, \theta} \mathcal{L}_N(h, \theta) - o(1)$ . For fixed  $h, \theta$ , we have  $\mathcal{L}_N(h, \theta) = O(\log N)$ . Thus, for any  $\beta > 0$  we clearly have  $\liminf(\log \tilde{\pi}(v^* | \hat{h}_N, \hat{\theta}_N))/N^\beta \geq 0$  and since we are in the misspecified case, following the logic of proposition [14](#), equation [20](#) may be used to see that we also have  $\hat{h}_N N^\beta \rightarrow \infty$ . Thus theorem [12](#) may be applied to  $\hat{h}, \hat{\theta}$  and a comparison of the Laplace approximations of  $m((X_n)_{n=1}^N | \hat{h}_N, \hat{\theta}_N)$  and  $m((X_n)_{n=1}^N | h_N, \theta_N)$  gives the result.  $\square$

We next examine in greater detail the behavior of the misspecification diagnostic  $h_N$ , along with the AR parameter estimate  $\theta_N$ . There are two cases to consider. First, if the support of the AR model matches the support of the data-generating distribution (that is,  $\text{supp}(f(\theta)) = \text{supp}_L(p^*)$  for all  $\theta$ ), then  $r_N = 0$  and  $\mathcal{L}_N = -\log \tilde{\pi}(v^* | h, \theta)$ ; we thus recover the standard empirical Bayes behavior of Petrone et al. [\[54\]](#), with  $h_N$  and  $\theta_N$  asymptotically maximizing the prior probability of the true parameter value. In this case we find that  $h_N$  converges to a finite positive value. The second case to consider is when  $\text{supp}_L(p^*) \subsetneq \text{supp}(f(\theta))$ . Here, we have  $r_N \neq 0$ , and in particular  $r_N(h, \theta) \approx -\frac{1}{h} \log(N) \sum_k \lambda_k(\theta)$ . In this case we find that  $h_N \rightarrow \infty$ . Thus, in either case,  $h_N \not\rightarrow 0$ , and so  $h_N$  will correctly diagnose misspecification in the AR model.

**Corollary 18.** *If the model is misspecified at resolution  $L$  but  $\text{supp}(f(\theta)) = \text{supp}_L(p^*)$  for all  $\theta$ ,  $h_N$  is eventually bounded above and below.*

*Proof.* Recall from proposition [14](#) that if  $h \rightarrow 0$ ,  $\log \tilde{\pi}(v^* | h, \theta) \leq -C \frac{1}{h} \inf_\theta \|f(\theta) - v^*\|$  for some  $C > 0$ . This expression diverges to  $-\infty$  as  $h \rightarrow 0$ . We also showed in proposition [15](#) that  $\log \tilde{\pi}(v^* | h, \theta) \leq \frac{1}{2} \dim \tilde{\Delta}_L(p^*) \log(1/h) + C$  for some  $C > 0$ . This expression also diverges as  $h \rightarrow \infty$ . Combining these two observations along with corollary [17](#) we get the result.  $\square$

To say something about  $\theta_N$ , due to corollary [17](#), we may use the theory of extremum estimators we can apply theorem 5.7 of van der Vaart [\[75\]](#), replacing limits in probability with a.s. limits to get

**Corollary 19.** *Say the model is misspecified at resolution  $L$  but  $\text{supp}(f(\theta)) = \text{supp}_L(p^*)$  for all  $\theta$ . Say also that  $\theta^* \in \Theta$ ,  $h^* > 0$  and  $d$  is a metric on  $\Theta$  such that for every  $\delta > 0$ ,*

$$\log \tilde{\pi}(v^* | h^*, \theta^*) > \sup_{|h-h^*| \vee d(\theta, \theta^*) > \delta} \log \tilde{\pi}(v^* | h, \theta).$$

*Then  $\theta_N \rightarrow \theta^*$  and  $h_N \rightarrow h^*$  a.s..*

Now we consider the case where the support do not match, i.e.  $\inf_\theta \max_k \lambda_k(\theta) > 0$ , where  $\lambda_k(\theta) = \sum_{b \notin \text{supp}_L(p^*)|_k} f_{k,b}(\theta)$ .

**Proposition 20.** *If the model is misspecified at resolution  $L$ ,  $\text{supp}_L(p^*) \subsetneq \text{supp}(f(\theta))$  for all  $\theta$ , and  $\inf_\theta \max_k \lambda_k(\theta) > 0$ , then  $h_N \rightarrow \infty$ .*

*Proof.* We first show  $h_N$  is a.s. bounded below. Since  $h_N N^\beta \rightarrow \infty$  for all  $\beta > 0$ , if  $h_{N_j} \rightarrow 0$  for some subsequence, we showed in proposition [14](#) that a.s.  $\log r_{N_j}(h_{N_j}, \theta_{N_j}) \leq -C \frac{\log(h_{N_j} N_j)}{2h_{N_j}} \inf_\theta \max_k \lambda_{k,\theta} + C' \leq -C'' \frac{\log(N_j)}{2h_{N_j}} \inf_\theta \max_k \lambda_{k,\theta} + C'$  for some  $C, C', C'' > 0$ . In particular,  $\log r_{N_j} \lesssim -O(\log(N))$  but  $\log r_{N_j} \not\sim -O(\log(N))$  if  $h_{N_j} \rightarrow 0$ . Thus, since  $\log r_N(h, \theta) \geq -C \log(N)$  for fixed  $h, \theta$ , for some  $C > 0$  dependent on  $h, \theta$  and  $\tilde{\pi}$  also diverges as  $h \rightarrow 0$ , the assumption that  $h_N$  maximizes the marginal likelihood is contradicted. Thus,  $h_N \not\rightarrow 0$ . In particular, we showed in proposition [15](#) (equation [23](#)) that  $\log \tilde{\pi}(v^* | h, \theta) \leq \frac{1}{2} \dim \tilde{\Delta}_L(p^*) \log(1/h) + C$  for some  $C > 0$  so we get that  $\log \tilde{\pi}(v^* | h_N, \theta_N)$  is bounded above a.s..

Assume  $h_N$  is bounded above; we will show that this leads to a contradiction. Define  $\gamma_{N,k} = 1/2$  if  $\sigma_k(\theta_N)/h_N \geq 1$  and  $\gamma_{N,k} = 1$  otherwise. Define  $\hat{\gamma}_{N,k}$  similarly for  $1/h_N$  alone. We next perform the same trick as in proposition [14](#), expanding  $\Gamma(\frac{1}{h_N})$  in the form of a

Stirling approximation, to analyze  $r_N$  further. Noting that  $\log(h_N N) \rightarrow \infty$ , we have a.s.,

$$\begin{aligned}
\log r_N(h_N, \theta_N) &= \sum_{k \in \text{acc}_L(p^*)} \frac{1}{h_N} \left[ -\lambda_k(\theta_N) \log(1 + \#k h_N) - \sigma_{N,k} \log(\sigma_k(\theta_N)) \right. \\
&\quad \left. + (\sigma_k(\theta_N) + \#k h_N) \log \left( \frac{\sigma_k(\theta_N) + \#k h_N}{1 + \#k h_N} \right) \right] \\
&\quad + \sum_{k \in \text{acc}_L(p^*)} (\gamma_{N,k} - 1/2) \log \left( \frac{\sigma_k(\theta_N)}{h_N} \right) \\
&\quad - \sum_{k \in \text{acc}_L(p^*)} (\hat{\gamma}_{N,k} - 1/2) \log \left( \frac{1}{h_N} \right) + O(1) \\
&= -\frac{\log(h_N N)}{h_N} \sum_{k \in \text{acc}_L(p^*)} \left[ \lambda_k(\theta_N) + o(1) \right] \\
&\quad + \sum_{k \in \text{acc}_L(p^*)} (\gamma_{N,k} - 1/2) \log \left( \frac{\sigma_k(\theta_N)}{h_N} \right) \\
&\quad - \sum_{k \in \text{acc}_L(p^*)} (\hat{\gamma}_{N,k} - 1/2) \log \left( \frac{1}{h_N} \right) + O(1).
\end{aligned} \tag{26}$$

Note  $\hat{\gamma}_{N,k} = 1$  only if  $\gamma_{N,k} = 1$  so that the the sum of these last two terms is negative. So, since  $h_N$  is bounded above,  $\log r_N(h_N, \theta_N) \leq -C \log(N) \inf_{\theta} \max_k \lambda_k(\theta)$  for some  $C > 0$ . Thus, since we also have that  $\log \tilde{\pi}(v^* | h_N, \theta_N)$  is bounded above a.s., we get that  $\mathcal{L}_N(h_N, \theta_N) \gtrsim \log(N)$  a.s.. On the other hand, with fixed  $\theta$ , if  $\hat{h}_N \rightarrow \infty$  (so we still have  $\log(h_N N) \rightarrow \infty$ ), then

$$\log r_N(\hat{h}_N, \theta) = -\frac{\log(N)}{\hat{h}_N} \sum_{k \in \text{acc}_L(p^*)} \left[ \lambda_k(\theta) + o(1) \right] + \frac{1}{2} \sum_{k \in \text{acc}_L(p^*)} \log(\sigma_k(\theta)) + O(1)$$

which is  $-o(\log N)$ , where we wrote  $\log(\hat{h}_N)/\hat{h}_N = o(1)$ . Now pick  $\hat{h}_N$  increasing slowly so that  $\mathcal{L}_N(\hat{h}_N, \theta) = o(\log(N))$ . This is eventually less than  $\mathcal{L}_N(h_N, \theta_N)$ , a contradiction. Thus,  $h_N \rightarrow \infty$ .  $\square$

We can also study the behavior of  $\theta_N$  in this mismatched supports case, using again the theory extremum estimators. We briefly outline the strategy, omitting details. Further analysis of equations [22](#) and [26](#) gives an objective, as  $h \rightarrow \infty$ , [6](#)

$$\mathcal{L}(h, \theta) = -\frac{\log(N)}{h} \left( \sum_k \lambda_k + o(1) \right) - \dim \tilde{\Delta}_L(p^*) \log h + (1+o(1)) \sum_{k, b \in \text{supp}_L(p^*)} \log(f_{k,b}(\theta)) + C + o(1)$$

for some fixed  $C > 0$ . Careful analysis of the  $o(1)$  terms shows that  $h$  approaches  $\frac{\log(N) \sum_k \lambda_k}{\dim \tilde{\Delta}_L(p^*)}$ . Plugging this value of  $h$  in, the objective becomes

$$\mathcal{L}(h, \theta) = -\dim \tilde{\Delta}_L(p^*) \log \sum_k \lambda_k + \sum_{k, b \in \text{supp}_L(p^*)} \log(f_{k,b}(\theta)) + C_N + o(1)$$

for some constant  $C_N$  dependent only on  $N$  and  $p^*$ . One can then see that  $\theta_N$  is an M-estimator of  $\dim \tilde{\Delta}_L(p^*) \log \sum_k \lambda_k + \sum_{k, b \in \text{supp}_L(p^*)} \log(f_{k,b}(\theta))$  and apply a similar analysis as in corollary [19](#).

So far we have seen that  $h_N \nearrow 0$  when the AR model is misspecified at resolution  $L$ , but exactly what value will  $h_N$  take and what can it tell us about the amount of misspecification?

---

<sup>6</sup>Note that the KL term in  $\tilde{\pi}$  can be dominated by  $\sum_{k, b \in \text{supp}_L(p^*)} \log(f_{k,b}(\theta))$ .

Here we analyze the objective  $\mathcal{L}_N$  heuristically to address these questions. From the expansions in proposition [14](#), we can write, for reasonable values of  $h, \theta$ , assuming not too much misspecification,

$$\begin{aligned}\log \tilde{\pi}(v^*|h, \theta) &\approx \frac{1}{2} \dim \tilde{\Delta}_L(p^*) \log \left( \frac{1}{h} \right) - \frac{1}{h} \sum_{k \in \text{acc}_L(p^*)} \text{KL}(f_k(\theta) \| v_k^*) \\ \log r_N(h, \theta) &\approx -\frac{\log(N)}{h} \sum_{k \in \text{acc}_L(p^*)} \lambda_k(\theta).\end{aligned}$$

We see, then, that  $\theta_N$  and  $h_N$  depend on an unconventional but valid divergence between the AR model and  $p^{*(L)}$ : the sum of the KL divergence between the AR model transition probabilities (from kmers that occur with non-zero probability) and the true transition probabilities, plus a penalty proportional to  $\log(N)$  when the support of the AR model does not match the support of  $p^*$ . We can thus interpret  $h_N$  not only as a diagnostic of misspecification, but also as a measurement of the *amount* of misspecification, and make comparisons between different AR models on the basis of their  $h_N$  values.

## G Hypothesis testing

In this section we use the results of the above sections to develop goodness-of-fit and two sample tests.

### G.1 Goodness-of-fit test

Say  $p^*$  is a distribution on  $S$  with  $\mathbb{E}|X|^2 < \infty$  and say  $X_1, X_2, \dots \sim p^*$  iid. Say  $\tilde{p}$  is another distribution on  $S$  with  $\mathbb{E} \log^2 \tilde{p}(X) < \infty$  where the expectation is with respect to  $p^*$ . We are interested in testing whether or not  $p^* = \tilde{p}$ , so we will consider the Bayes factor

$$\text{BF}_L = \frac{\tilde{p}(X_n)_{n=1}^N}{p((X_n)_{n=1}^N | \mathcal{M}_L)}.$$

This test asks whether or not  $\tilde{p}$  approximates  $p^*$  at least as well as the optimal model in  $\mathcal{M}_L$ . We can use it in particular to test whether  $\tilde{p}$  matches the data-generating distribution  $p^*$  at resolution  $L$ , that is, whether  $\tilde{p}$  matches  $p^{*(L)}$ .

**Proposition 21.** *Given  $L$ , consider a  $\text{Dirichlet}(\alpha_{k,b})_{b \in \tilde{\mathcal{B}}}$  prior on the simplex in  $\Delta_{\tilde{\mathcal{B}}}^{\mathcal{B}_L^o}$  corresponding to the  $L$ -mer  $k$ . For all  $L$ , assume  $\alpha_{k,b} > 0$  for  $(k, b) \in \text{supp}_L(p^*)$  (otherwise  $p((X_n)_{n=1}^N | \mathcal{M}_L)$  is eventually 0 a.s.). Then if  $\tilde{p} \neq p^{*(L)}$ ,*

$$\log \text{BF}_L = N(\text{KL}(p^* \| p^{*(L)}) - \text{KL}(p^* \| \tilde{p})) + O_P(\sqrt{N}),$$

*which goes to  $\infty$  in probability if  $\text{KL}(p^* \| p^{*(L)}) > \text{KL}(p^* \| \tilde{p})$  and to  $-\infty$  in probability if  $\text{KL}(p^* \| p^{*(L)}) < \text{KL}(p^* \| \tilde{p})$ . If  $\tilde{p} = p^{*(L)}$*

$$\log \text{BF}_L = \frac{1}{2} \dim_L^{\text{eff}}(p^*) \log N + O_P(1),$$

*which goes to  $\infty$  in probability.*

*Proof.* Note that as shown in the proof of theorem [7](#),  $\text{KL}(p^* | \mathcal{M}_L) = \text{KL}(p^* \| p^{*(L)})$ , and

$$\log p((X_n)_{n=1}^N | \mathcal{M}_L) = \log p^{*(L)}((X_n)_{n=1}^N) - \frac{1}{2} \dim_L^{\text{eff}}(p^*) \log N + O_P(1). \quad (27)$$

As well,  $\tilde{p}(X_n)_{n=1}^N = N \mathbb{E} \log \tilde{p}(X) + O_P(\sqrt{N})$  and a similar expression can be written for  $p^{*(L)}$ . These two facts prove the result.  $\square$

*Remark 3.* One may also consider a Bayes factor that integrates over many  $L$ :

$$\text{BF} = \frac{\tilde{p}(X_n)_{n=1}^N}{\sum_{L=1}^{\tilde{L}} \pi(L) p((X_n)_{n=1}^N | \mathcal{M}_L)} = \left( \sum_{L=1}^{\tilde{L}} \pi(L) \text{BF}_L^{-1} \right)^{-1}$$

for a prior  $\pi$  with  $\pi(\tilde{L}) > 0$ . By proposition [21](#), this Bayes factor goes to 0 if  $\text{KL}(p^* \| p^{*(\tilde{L})}) < \text{KL}(p^* \| \tilde{p})$  and goes to  $\infty$  if  $\text{KL}(p^* \| p^{*(\tilde{L})}) > \text{KL}(p^* \| \tilde{p})$  or  $\tilde{p} = p^{*(\tilde{L})}$  (this later condition is implied by  $\tilde{p} = p^{*(L)}$  for some  $L \leq \tilde{L}$  and  $\text{KL}(p^* \| p^{*(L)}) = \text{KL}(p^* \| \tilde{p})$ ). Thus this Bayes factor has the same asymptotics as  $\text{BF}_{\tilde{L}}$ .

## G.2 Two-sample test

To set up the two-sample testing problem, consider two distributions  $p_1$  and  $p_2$  on  $S$  such that  $\mathbb{E}_{p_j} |X|^2 < \infty$  for  $j \in \{1, 2\}$ . We will assume that the two groups of datapoints are sampled together according to a mixture model with observed labels. That is, let  $j_1, j_2, \dots$  be observed Bernoulli iid random variables indicating the group, with  $j_n = 1$  with probability  $\beta$  and  $j_n = 2$  with probability  $1 - \beta$  for a  $0 < \beta < 1$ . Then, let  $X_n \sim p_{j_n}$  independently. The pooled dataset thus follows the generative process  $X_1, X_2, \dots \sim p^* = \beta p_1 + (1 - \beta) p_2$  iid. We are interested in whether or not  $p_1 \neq p_2$ . To make this question theoretically tractable, we will fix the lag  $L$ , and attempt only to discern whether  $p_1^{(L)} \neq p_2^{(L)}$  where  $p_j^{(L)}$  is the best approximation to  $p_j$  in  $\mathcal{M}_L$  (as defined in section [E](#)). In other words, we attempt to distinguish between  $p_1$  and  $p_2$  only up to a "resolution", in analogy to Holmes et al. [\[30\]](#). We thus consider the Bayes factor

$$\begin{aligned} \text{BF}_L &= \frac{p((X_n)_{n=1}^N | (j_n)_{n=1}^N, p_1 = p_2 \text{ and } p_1, p_2 \in \mathcal{M}_L)}{p((X_n)_{n=1}^N | (j_n)_{n=1}^N, p_1 \neq p_2 \text{ and } p_1, p_2 \in \mathcal{M}_L)} \\ &= \frac{p((X_n)_{n=1}^N | \mathcal{M}_L)}{p((X_n)_{n \leq N, j_n=1} | \mathcal{M}_L) p((X_n)_{n \leq N, j_n=2} | \mathcal{M}_L)}. \end{aligned} \quad (28)$$

In the subsequent remark, we also extend the theory to Bayes factors that integrate over all  $L$  up to some fixed maximum.

Consider independent Dirichlet  $(\alpha_{k,b})_{b \in \tilde{\mathcal{B}}}$  priors on the simplexes in  $\Delta_{|\tilde{\mathcal{B}}|}^{\mathcal{B}_L^o}$  corresponding to the  $L$ -mers  $k$ . Assume  $\alpha_{k,b} > 0$  for  $(k, b) \in \text{supp}_L(p^*) = \text{supp}_L(p_1) \cup \text{supp}_L(p_2)$ .

**Proposition 22.** *If  $p_1^{(L)} \neq p_2^{(L)}$ ,*

$$\begin{aligned} \log \text{BF}_L &= N \left[ \beta \mathbb{E}_{p_1} \log \frac{p^{*(L)}(X)}{p_1^{(L)}(X)} + (1 - \beta) \mathbb{E}_{p_2} \log \frac{p^{*(L)}(X)}{p_2^{(L)}(X)} \right] + O_P(\sqrt{N}) \\ &\rightarrow -\infty \text{ as } N \rightarrow \infty. \end{aligned} \quad (29)$$

Otherwise  $p_1^{(L)} = p_2^{(L)}$  and

$$\begin{aligned} \log \text{BF}_L &= \frac{1}{2} \dim_L^{\text{eff}}(p^*) \log N + O_P(1) \\ &\rightarrow \infty \text{ as } N \rightarrow \infty. \end{aligned} \quad (30)$$

*Proof.* First note that as shown in the proof of theorem [7](#) noting  $|\{n | j_n = j\}| / N = O_P(1)$ ,

$$\begin{aligned} \log p((X_n)_{n=1}^N | \mathcal{M}_L) &= \log p^{*(L)}((X_n)_{n=1}^N) - \frac{1}{2} \dim_L^{\text{eff}}(p^*) \log N + O_P(1) \\ \log p((X_n)_{n \leq N, j_n=j} | \mathcal{M}_L) &= \log p_j^{(L)}((X_n)_{n \leq N, j_n=j}) - \frac{1}{2} \dim_L^{\text{eff}}(p_j) \log N + O_P(1) \end{aligned} \quad (31)$$

for  $j \in \{1, 2\}$ . As well,  $\log p^{*(L)}((X_n)_{n=1}^N) = N \mathbb{E} \log p^{*(L)}(X) + O_P(\sqrt{N})$  by our assumption on the moments  $\mathbb{E}_{p_j} |X|^2 < \infty$  and similar expressions exist for  $p_1$  and  $p_2$ . Finally note that

$$\begin{aligned} \arg \min_{v \in \Delta_{\tilde{\mathcal{B}}}^{\mathcal{B}_L^o}} \text{KL}(p^* \| p_v) &= \arg \max \mathbb{E}_{p^*} \log p_v(X) \\ &= \arg \max \beta \mathbb{E}_{p_1} \log p_v(X) + (1 - \beta) \mathbb{E}_{p_2} \log p_v(X). \end{aligned} \quad (32)$$

Thus, if  $p_1^{(L)} = p_2^{(L)}$  then  $p_1^{(L)} = p_2^{(L)} = p^{*(L)}$ .

First assume  $p_1^{(L)} \neq p_2^{(L)}$ . So, we have

$$\begin{aligned} \log \text{BF}_L &= N \mathbb{E}_{p^*} \log p^{*(L)} - \beta N \mathbb{E}_{p_1} \log p_1^{(L)}(X) - (1 - \beta) N \mathbb{E}_{p_2} \log p_2^{(L)}(X) + O_P(\sqrt{N}) \\ &= N \left[ \beta \mathbb{E}_{p_1} \log \frac{p^{*(L)}}{p_1^{(L)}} + (1 - \beta) \mathbb{E}_{p_2} \log \frac{p^{*(L)}}{p_2^{(L)}} \right] + O_P(\sqrt{N}). \end{aligned} \tag{33}$$

Note  $\mathbb{E}_{p_1} \log \frac{p^{*(L)}}{p_1^{(L)}} = \text{KL}(p_1 \| p_1^{(L)}) - \text{KL}(p_1 \| p^{*(L)}) \leq 0$  by the definition of  $p_1^{(L)}$ . Since  $p_1^{(L)} \neq p_2^{(L)}$ , at least one of  $\mathbb{E}_{p_1} \log \frac{p^{*(L)}}{p_1^{(L)}}$ ,  $\mathbb{E}_{p_2} \log \frac{p^{*(L)}}{p_2^{(L)}}$  must be negative and so  $\log \text{BF}_L \rightarrow -\infty$ .

Now say  $p_0^{(L)} = p^{*(L)} = p_1^{(L)}$ . In this case,

$$\log \text{BF}_L = \frac{1}{2} \dim_L^{\text{eff}}(p^*) \log N + O_P(1).$$

Clearly  $\log \text{BF}_L \rightarrow \infty$ . □

*Remark 4.* One may also consider a Bayes factor that integrates over many lags:

$$\text{BF} = \frac{\sum_{L=1}^{\tilde{L}} \pi(L) p((X_n)_{n=1}^N | \mathcal{M}_L)}{\left( \sum_{L=1}^{\tilde{L}} \pi(L) p((X_n)_{n \leq N, j_n=1} | \mathcal{M}_L) \right) \left( \sum_{L=1}^{\tilde{L}} \pi(L) p((X_n)_{n \leq N, j_n=2} | \mathcal{M}_L) \right)}.$$

By theorem 7, for all three sums, eventually either (a) assuming the condition for consistency in corollary 11 the term corresponding to the smallest  $L$  such that  $p^* \in \mathcal{M}_L$  will dominate, if  $p^* \in \mathcal{M}_{\tilde{L}}$ , or (b) the term corresponding to  $\tilde{L}$  will dominate, if  $p^* \notin \mathcal{M}_{\tilde{L}}$ . Thus, by analysis similar to that of proposition 22, in any case, we have equation 29 with  $L$  replaced by  $\tilde{L}$ , so that the Bayes factor goes to 0 if  $p_1^{(\tilde{L})} \neq p_2^{(\tilde{L})}$ . If, on the other hand, we have  $p_1^{(\tilde{L})} = p_2^{(\tilde{L})}$ , then there are two cases:  $p_1 = p_2 \in \mathcal{M}_{L^*}$  for some  $L^* \leq \tilde{L}$  (and  $L^*$  is picked to be the smallest such lag), or  $p_1, p_2 \notin \mathcal{M}_{\tilde{L}}$ . In the first case,  $p^* \in \mathcal{M}_{L^*}$  so the asymptotics of BF are identical to that of  $\text{BF}_{L^*}$  and we can refer to proposition 22 to see that the Bayes factor goes to  $\infty$ . In the second case, we may still have  $p^* \in \mathcal{M}_{L^*}$  for some minimal  $L^* \leq \tilde{L}$ ; if  $p^*$  is not a Markov model with lag  $\leq \tilde{L}$ , call  $L^* = \tilde{L}$ . In this case, by the analysis of proposition 22,

$$\log \text{BF} = \left( \dim_{\tilde{L}}^{\text{eff}}(p^*) - \frac{1}{2} \dim_{L^*}^{\text{eff}}(p^*) \right) \log N + O_P(1) \rightarrow \infty.$$

Thus the asymptotics of this integrated Bayes factor are identical to that of  $\text{BF}_{\tilde{L}}$ .

## H Consistency in the infinite $L$ case

So far we have only studied consistency in the finite lag  $L$  case, that is, our results only show that we can approximate  $p^*$  up to some finite resolution  $L$  (corresponding to the largest available lag). In this section, we develop frequentist and Bayesian consistency results for the fully nonparametric model, that is, we allow for priors with support over all lags  $L$  up to infinity, and show that we can approximate  $p^*$  itself even if  $p^* \notin \mathcal{M}$ . The Bayesian consistency result is our main result, and the most practically useful, but the frequentist result is a natural first step toward the Bayesian result, and an opportunity to develop novel constructions (such as the projection algorithm in section H.2) useful in proving the Bayesian result.

### H.1 Frequentist consistency

We first show that maximum likelihood estimation is consistent, using the method of sieves described in Geman and Hwang [22]. The idea is to increase the size of the model class with the amount of data  $N$  slowly enough to avoid over-fitting. We define the model class considered for  $N$  data points first with the lag  $L$ , but also by restricting transition

probabilities to be bounded below by a  $\nu$ : In particular, when there are  $N$  datapoints, the model class we consider, or the  $N$ -th "sieve", is  $\mathcal{S}_N = \{v \in \Delta_{\mathcal{B}}^{\mathcal{B}_{L_N}^o} \mid \forall k, b, v_{k,b} \geq \nu_N\}$  where  $(\nu_N)_{N=1}^\infty, (L_N)_{N=1}^\infty$  are sequences with  $L_N \rightarrow \infty, \nu_N \rightarrow 0$ .

**Theorem 23.** *Say  $X_1, X_2, \dots \sim p^*$  iid where  $p^*$  is a subexponential distribution on  $S$ . Say  $p_{v_N}$  is a maximum likelihood distribution with  $v_N \in \mathcal{S}_N$  given  $(X_n)_{n=1}^N$ .  $p_{v_N} \rightarrow p^*$  and  $\text{KL}(p^* || p_{v_N}) \rightarrow 0$  a.s. if for some  $\epsilon > 0$ ,*

$$\frac{|\text{supp}_{L_N}(p^*)|(\log(\nu_N^{-1}))^{1+\epsilon}}{N} \rightarrow 0. \quad (34)$$

*Proof.* The proof follows that of theorem 3 of Geman and Hwang [22].

First note that  $\mathcal{S}_N$  is compact and the likelihood function is continuous so a maximum likelihood  $v_N$  always exists. This satisfies condition C1 of theorem 2 of Geman and Hwang [22].

Next, to satisfy condition C2 (b) of theorem 2 of Geman and Hwang [22] we show that there are  $\tilde{v}_N \in \mathcal{S}_N$  such that  $\text{KL}(p^* || p_{\tilde{v}_N}) \rightarrow 0$ . First, for each  $L$ , pick a distribution  $p^L$  on  $S$  such that for all  $|X| \leq L$ ,  $p^L(X) > 0$  and  $\text{KL}(p^* || p^L) \rightarrow 0$  as  $L \rightarrow \infty$  (for example, pick  $p^L(|X| > L) = p^*(|X| > L)$ ,  $p^L(\cdot || X| > L) = p^*(\cdot || X| > L)$  and  $p^L(\cdot || X| \leq L)$  positive with  $\text{KL}(p^*(\cdot || X| \leq L) || p^L(\cdot || X| \leq L)) < 1/L$ ).  $p^L$  as defined in proposition 3 is a lag  $L$  Markov model with positive transition probabilities. Thus, for large  $N$ , its transition probabilities are in  $\mathcal{S}_N$ . Now notice,

$$\begin{aligned} \text{KL}(p^* || p^L) &= \mathbb{E} \left[ \log \left( \frac{p^*(X)}{p^L(X)} \right); |X| \leq L \right] + \mathbb{E} \left[ \log \left( \frac{p^*(X)}{p^L(X)} \right); |X| > L \right] \\ &= \mathbb{E} \left[ \log \left( \frac{p^*(X)}{p^L(X)} \right); |X| \leq L \right] \\ &\quad + \mathbb{E} \left[ \log \left( \frac{p^*(X)}{p^L(X_{1:L} \dots) |\tilde{\mathcal{B}}|^{-(|X|-L)}} \right); |X| > L \right] \\ &\leq \mathbb{E} \left[ \log \left( \frac{p^*(X)}{p^L(X)} \right); |X| \leq L \right] \\ &\quad + \mathbb{E} \left[ \log \left( \frac{p^*(X)}{p^L(X) |\tilde{\mathcal{B}}|^{-(|X|-L)}} \right); |X| > L \right] \\ &= \text{KL}(p^* || p^L) + (\log |\tilde{\mathcal{B}}|) \mathbb{E}[|X| - L; |X| > L] \\ &\rightarrow 0 \text{ as } L \rightarrow \infty \text{ as } \mathbb{E}|X| < \infty. \end{aligned} \quad (35)$$

Now we can pick  $\tilde{v}_N \in \mathcal{S}_n$  such that  $\text{KL}(p^* || p_{\tilde{v}_N}) \rightarrow 0$ .

That  $\text{KL}(p^* || p_N) \rightarrow 0$  implies  $p_N \rightarrow p$  for distributions  $p_N$  on  $S$  follows from Pinsker's inequality. This satisfies condition C2 (a) of theorem 2 of Geman and Hwang [22]. However, note that the proof of theorem 2 of Geman and Hwang [22] also shows that if  $v_N$  is an MLE in  $\mathcal{S}_N$  and the conditions of the theorem hold, then  $\text{KL}(p^* || p_{v_N}) \rightarrow 0$  a.s..

Finally, we define a partition of each  $\mathcal{S}_N$  that satisfies conditions i-iii of theorem 2 of Geman and Hwang [22] to get the result. Pick a sequence  $\rho_N \rightarrow 0$  with  $\log(\nu_N^{-1}) > (\log(1 + \rho_N))^{-1}$  eventually. Call  $\mathbb{N}$  the set of positive integers and for a  $\zeta \in \mathbb{N}^{\text{supp}_{L_N}(p^*)}$ , define

$$\hat{\mathcal{O}}_N(\zeta) := \{v \in \mathcal{S}_N \mid \forall (k, b) \in \text{supp}_{L_N}(p^*), (1 + \rho_N)^{\zeta_{k,b}} \nu_N > v_{k,b} \geq (1 + \rho_N)^{\zeta_{k,b}-1} \nu_N\}$$

so that  $\cup_{\zeta \in \mathbb{N}^{\text{supp}_{L_N}(p^*)}} \hat{\mathcal{O}}_N(\zeta) = \mathcal{S}_N$  (Fig. S3). Call  $\gamma_N = \left( \frac{\log(\nu_N^{-1})}{\log(1 + \rho_N)} + 1 \right)$  and note  $(1 + \rho_N)^{\gamma_N - 1} \nu_N = 1$ . Thus the number of choices of  $\zeta$  that give non-empty sets, call this  $\#\hat{\mathcal{O}}_N$ , is bounded above by  $\gamma_N^{|\text{supp}_{L_N}(p^*)|}$ . Now notice eventually

$$\gamma_N = \frac{\log(\nu_N^{-1})}{\log(1 + \rho_N)} + 1 \geq (\log(\nu_N^{-1}))^2 + 1 \geq (\log(\nu_N^{-1}))^4$$



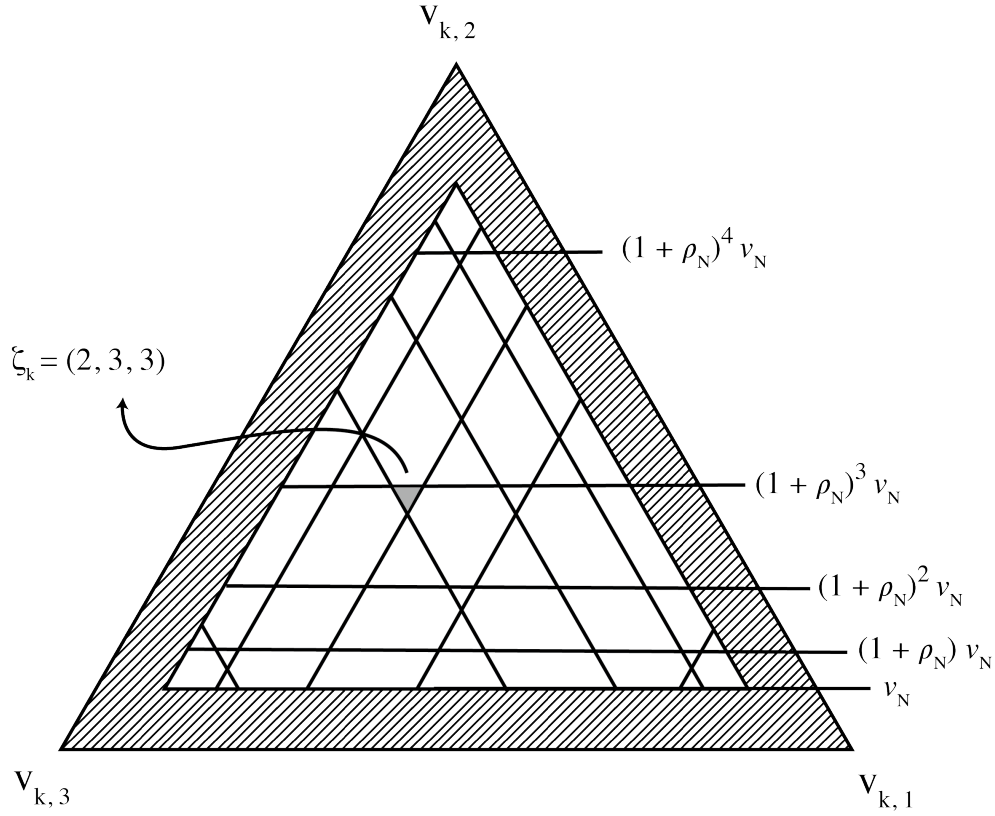

Figure S3: Sieves  $\mathcal{S}_N$  are broken up into subsets  $\hat{\mathcal{O}}_N(\zeta)$ , each a Cartesian product of subsets of  $\Delta_{\vec{B}}$ , and these subsets in turn are indexed by  $\zeta_k$  for each  $k$ . Here we illustrate one such subset of  $\Delta_{\vec{B}}$ , when  $|\vec{B}| = 3$  and  $\text{supp}_{L_N}(p^*)|_k = \vec{B}$ . The region included in  $\hat{\mathcal{O}}_N(\zeta)$  when  $\zeta_k = (2, 3, 3)$  is shown in solid gray, while all other possible subsets for different values of  $\zeta_k$  are shown in white. The region adjacent to the border of the simplex (hatched lines) corresponds to those transition vectors that have components less than  $\nu_N$  and are therefore not part of the sieve  $\mathcal{S}_N$ .

so that  $\#\hat{\mathcal{O}}_N \leq \exp(4(\log \log(\nu_n^{-1}))|\text{supp}_{L_n}(p^*)|)$ .

Say  $\eta > 0$  and, picking a  $\zeta \in \mathbb{N}^{\text{supp}_{L_N}(p^*)}$ , define

$$\mathcal{O}_N(\zeta) = \{v \in \hat{\mathcal{O}}_N(\zeta) \mid \text{KL}(p^*||p_{\tilde{v}_N}) - \text{KL}(p^*||p_v) = \mathbb{E} \log \left( \frac{p_v(X)}{p_{\tilde{v}_N}(X)} \right) \leq -\eta\}$$

$$\phi_\zeta(t) = \mathbb{E} \exp \left( t \log \left( \frac{\sup_{v \in \mathcal{O}_N(\zeta)} p_v(X)}{p_{\tilde{v}_N}(X)} \right) \right).$$

Note  $\phi_\zeta(t) \leq \mathbb{E} \exp(t|X|(\log(\nu_N^{-1})))$  which is finite for small enough  $t$  by assumption.  $\phi_\zeta$  and the bound  $\mathbb{E} \exp(t|X|(\log(\nu_n^{*-1})))$  are partition functions for exponential families so, since they are finite for small  $t$ , they are  $C^\infty$  with derivatives obtained by exchanging differentiation and integration for small  $t$  by theorem 4.5 of van der Vaart [75]. In particular, for  $t < C_{p^*}/(\log(\nu_N^{-1}))$  for some  $C_{p^*}$  that depends on  $p^*$ , defining another constant that depends on  $p^*$ ,  $C'_{p^*} < \infty$ ,

$$\begin{aligned} \phi''_\zeta(t) &= \mathbb{E} \left[ \left( \log \left( \frac{\sup_{v \in \mathcal{O}_N(\zeta)} p_v(X)}{p_{\tilde{v}_N}(X)} \right) \right)^2 \exp \left( t \log \left( \frac{\sup_{v \in \mathcal{O}_N(\zeta)} p_v(X)}{p_{\tilde{v}_N}(X)} \right) \right) \right] \\ &\leq (\log(\nu_N^{-1}))^2 \mathbb{E} [|X|^2 \exp(t|X|(\log(\nu_N^{-1})))] \\ &\leq C'_{p^*} (\log(\nu_N^{-1}))^2. \end{aligned} \tag{36}$$

As well, for any  $v_1, v_2 \in \hat{\mathcal{O}}_N(\zeta)$ , for all  $(k, b) \in \text{supp}_{L_N}(p^*)$ ,  $|\log(v_{1,k,b}/v_{2,k,b})| < \log(1 + \rho_N) < \rho_N$ . Thus, for all  $v \in \mathcal{O}_N(\zeta)$ , since if  $p^*(X) > 0$  then all  $L_N$ -mer-base transitions in  $X$  are in  $\text{supp}_{L_N}(p^*)$ ,  $\mathbb{E} \log \left( \frac{\sup_{v \in \mathcal{O}_N(\zeta)} p_v(X)}{p_v(X)} \right) < \rho_N \mathbb{E}|X|$ . So, defining  $C''_{p^*} = \mathbb{E}|X|$ ,

$$\phi'_\zeta(0) = \mathbb{E} \log \left( \frac{\sup_{v \in \mathcal{O}_N(\zeta)} p_v(X)}{p_v(X)} \right) + \mathbb{E} \log \left( \frac{p_v(X)}{p_{\bar{v}_N(X)}} \right) < \rho_N C''_{p^*} - \eta. \quad (37)$$

Putting things together we get, for small  $t$ ,

$$\phi_\zeta(t) \leq 1 + t(\rho_N C''_{p^*} - \eta) + \frac{1}{2} t^2 C'_{p^*} (\log(\nu_N^{-1}))^2. \quad (38)$$

Picking  $t = 2(\log(\nu_N^{-1}))^{-(1+\epsilon)}$  for some  $\epsilon > 0$  gives, for large enough  $N$ , for any  $\zeta$ ,  $\phi_\zeta(t) \leq 1 - \eta/(\log(\nu_N^{-1}))^{1+\epsilon} \leq \exp(-\eta/(\log(\nu_N^{-1}))^{1+\epsilon})$ . Finally note that

$$\frac{(\log(\nu_N^{-1}))^{1+\epsilon}}{N^{1-\epsilon'}} = \left( \frac{(\log(\nu_N^{-1}))^{(1+\epsilon)/(1-\epsilon')}}{N} \right)^{1-\epsilon'} \rightarrow 0$$

by equation [34](#) if  $\epsilon, \epsilon'$  are small enough. Now write, for large  $N'$  and positive constants  $\epsilon'', C, C', C''$ ,

$$\begin{aligned} \sum_{N > N'} (\#\hat{\mathcal{O}}_N) \left( \sup_{\zeta} \inf_{t > 0} \phi_\zeta(t) \right)^N &\leq \sum_N \exp \left( 4(\log \log(\nu_N^{-1})) |\text{supp}_{L_N}(p^*)| - \frac{N\eta}{(\log(\nu_N^{-1}))^{1+\epsilon}} \right) \\ &\leq \sum_N \exp \left( - \frac{N\eta}{(\log(\nu_N^{-1}))^{1+\epsilon}} \left( 1 - C \frac{|\text{supp}_{L_N}(p^*)| (\log(\nu_N^{-1}))^{1+\epsilon''}}{N} \right) \right) \\ &\leq \sum_N \exp \left( - N^{\epsilon'} C' \right) \\ &\leq \int_0^\infty dx \exp(-C'' x^{\epsilon'}) \\ &= \epsilon'^{-1} C''^{-1/\epsilon'} \int_0^\infty dx x^{1/\epsilon' - 1} \exp(-x) \\ &= \epsilon'^{-1} C''^{-1/\epsilon'} \Gamma(1/\epsilon') \\ &< \infty \end{aligned} \quad (39)$$

using the assumptions of the theorem and replacing  $\epsilon$  by  $\epsilon''$  to absorb  $\log \log(\nu_N^{-1})$  (note one can make  $\epsilon, \epsilon', \epsilon''$  as close to 1 as desired). This shows that all conditions of theorem 2 of Geman and Hwang [22](#) are satisfied.  $\square$

*Remark 5.* To pick viable  $(L_N)_N, (\nu_N)_N$ , note  $|\text{supp}_{L_N}(p^*)| \leq |\tilde{\mathcal{B}}| |\mathcal{B}_{L_N}^o|$ , so, since

$$|\mathcal{B}_N^o| = \sum_{l=0}^{L_N} |\mathcal{B}|^l = \frac{|\mathcal{B}|^{L_N+1} - 1}{|\mathcal{B}| - 1} \leq |\mathcal{B}|^{L_N+1},$$

we have  $|\text{supp}_{L_N}(p)| \lesssim |\mathcal{B}|^{L_N}$ . Thus, as an example, for  $c_1, c_2 > 0$  such that  $1 > c_1 + c_2$ ,  $L_N = \lceil c_1 \log N / \log |\mathcal{B}| \rceil$  and  $\nu_N = e^{-N^{c_2}}$  satisfy condition [34](#). We can see that without any *a priori* knowledge of  $|\text{supp}_{L_N}(p^*)|$  we are forced to pick a very slow growing sequence  $(L_N)_N$ , and thus it is likely that the model class is too conservative for  $p^*$  whose support have cardinality far from the upper bound. By adapting  $L_N$  to the content of the data in addition to its cardinality, the Bayesian approach described in section [H.3](#) does not suffer from this conceptual issue.

## H.2 The projection algorithm

Fix  $L$  and  $\nu$  for this section and define  $\mathcal{S} = \{v \in \Delta_{\tilde{\mathcal{B}}}^{\mathcal{B}_L^o} \mid v_{k,b} \geq \nu \forall k, b\}$ . Given data  $X_1, \dots, X_N$ , any maximum likelihood estimate (MLE) in  $\mathcal{M}_L$ ,  $v$ , has, for every  $L$ -mer  $k$  that is seen in the data,  $v_{k,b} = \#(k, b) / (\sum_{b' \in \tilde{\mathcal{B}}} \#(k, b'))$  where  $\#(k, b)$  is the number of times  $k$  is seen in the data immediately preceding  $b$ . If  $\bar{v}$  is a MLE in  $\mathcal{S}$ , it will be shown that for each  $L$ -mer  $k$  that is seen in the data,  $(\bar{v}_{k,b})_{b \in \tilde{\mathcal{B}}}$  is equal to a "projection" of  $(v_{k,b})_{b \in \tilde{\mathcal{B}}}$  onto the smaller simplex  $\{v_k \in \Delta_{|\tilde{\mathcal{B}}|} \mid v_{k,b} \geq \nu \forall b\}$ . This projection is defined in algorithm [2](#), and the rest of this section will be devoted to its properties, including continuity, bounds, and proof of the above statement in proposition [28](#). Some of these bounds will be used to prove the consistency of nonparametric Bayesian inference in section [H.3](#). For ease of exposition, we will first present a conceptually simpler version of the projection algorithm, algorithm [1](#).

---

### Algorithm 1 PROJECTION ALGORITHM I

---

**Input :** Non-negative numbers  $(u_b)_{b \in \tilde{\mathcal{B}}}$ , with  $\sum_{b \in \tilde{\mathcal{B}}} u_b > 0$ , and a positive number  $\nu \leq 1/|\tilde{\mathcal{B}}|$ .

**Output:**  $(\bar{u}_b)_{b \in \tilde{\mathcal{B}}}$  such that  $\sum_{b \in \tilde{\mathcal{B}}} \bar{u}_b = 1$  and  $\bar{u}_b \geq \nu$  for all  $b$ .

```

1:  $\bar{u}_b^{(0)} \leftarrow u_b / (\sum_{b' \in \tilde{\mathcal{B}}} u_{b'})$ 
2:  $B^{(0)} \leftarrow |\{b \mid \bar{u}_b^{(0)} \leq \nu\}|$ 
3:  $i \leftarrow 1$ 
4: while there exists a  $b$  with  $\bar{u}_b^{(i-1)} < \nu$  do
5:   for  $b \in \tilde{\mathcal{B}}$  do
6:     if  $\bar{u}_b^{(i-1)} \leq \nu$  then
7:        $\bar{u}_b^{(i-1)} \leftarrow \nu$ 
8:     else
9:        $\bar{u}_b^{(i-1)} \leftarrow (1 - B^{(i-1)}\nu) u_b / (\sum_{b' \mid \bar{u}_{b'}^{(i-1)} > \nu} u_{b'})$ 
10:   $B^{(i)} \leftarrow |\{b' \mid \bar{u}_{b'}^{(i)} \leq \nu\}|$ 
11:   $i \leftarrow i + 1$ 
12: for  $b \in \tilde{\mathcal{B}}$  do
13:   $\bar{u}_b \leftarrow \bar{u}_b^{(i-1)}$ 

```

---

**Proposition 24.** Say algorithm [1](#) is applied to non-negative numbers  $(u_b)_{b \in \tilde{\mathcal{B}}}$  with  $\sum_b u_b > 0$ . Define  $(\bar{u}_b)_b$ ,  $((\bar{u}_b^{(i)})_b)_i$  and  $(B^{(i)})_i$  as in the algorithm. Say the algorithm terminates at step  $I$ .

- 1) For all  $i$ ,  $\sum_{b=1}^{|\tilde{\mathcal{B}}|} \bar{u}_b^{(i)} = 1$ .
- 2) If  $(u_b)_b$  are scaled by a positive constant, the output  $(\bar{u}_b)_b$  remains the same.
- 3) Say  $(\bar{v}_b^{(i)})_b$  is the  $i$ -th iteration of algorithm [1](#) with input  $(\bar{u}_b^{(j)})_b$ .  $(\bar{v}_b^{(i)})_b = (\bar{u}_b^{(j+i)})_b$ .
- 4)  $I < |\tilde{\mathcal{B}}|$ . The algorithm remains unchanged if the while loop were replaced by "**for**  $i = 1, \dots, |\tilde{\mathcal{B}}| - 1$  **do**".
- 5)  $\bar{u}_b \geq (1 - (|\tilde{\mathcal{B}}| - 1)\nu)\bar{u}_b^{(0)}$ .

*Proof.* Results 1 and 2 are clear. For 3, note that if both  $\bar{u}_b^{(j)}$  and  $\bar{u}_{b'}^{(j)}$  are greater than  $\nu$ , then  $\bar{u}_b^{(j)} / \bar{u}_{b'}^{(j)} = u_b / u_{b'}$ . Thus, if  $\bar{u}_b^{(j)} > \nu$ ,

$$\bar{u}_b^{(j+1)} = (1 - B^{(j)}\nu) \bar{u}_b^{(j)} / \left( \sum_{b' \mid \bar{u}_{b'}^{(j)} > \nu} \bar{u}_{b'}^{(j)} \right) = \bar{v}_b^{(1)}.$$

Similar logic may be used to show  $(\bar{v}_b^{(2)})_b = (\bar{u}_b^{(j+2)})_b$  and so on.

To see 4, notice that for every  $i \leq I$ , at least one  $b$  has  $\bar{u}_b^{(i)} = \nu$  while  $\bar{u}_b^{(i-1)} < \nu$ . Thus,  $(\hat{B}^{(i)})_{i=0}^I := (|\{b' \mid \bar{u}_{b'}^{(i)} \leq \nu\}|)_{i=0}^I$  is a strictly increasing sequence.  $\hat{B}^{(i)} \leq |\tilde{\mathcal{B}}|$  as  $\nu \leq 1/|\tilde{\mathcal{B}}|$ .

If  $\hat{B}^{(I)} = |\tilde{\mathcal{B}}|$  then  $\nu = 1/|\tilde{\mathcal{B}}|$  and, by property 1,  $\hat{B}^{(i)} \neq |\tilde{\mathcal{B}}| - 1$  for every  $i$ . In any case, the sequence  $(\hat{B}^{(i)})_{i=0}^I$  may take on at most  $|\tilde{\mathcal{B}}|$  values (including 0) and thus  $I < |\tilde{\mathcal{B}}|$ . The second statement of 4 follows from the fact that for all  $b$ ,  $\bar{u}_b \geq \nu$  and thus would remain unaltered by the procedure in the while statement.

Finally, for 5, first say  $\bar{u}_b > \nu$  and note that  $B^{(I-1)} < |\tilde{\mathcal{B}}|$  (otherwise the algorithm is terminated or property 1 is violated).

$$\bar{u}_b = (1 - B^{(I-1)}\nu) \frac{u_b}{\left(\sum_{b' \mid \bar{u}_{b'}^{(I-1)} > \nu} u_{b'}\right)} \geq (1 - B^{(I-1)}\nu) \frac{u_b}{\left(\sum_{b'} u_{b'}\right)} \geq (1 - (|\tilde{\mathcal{B}}| - 1)\nu) \bar{u}_b^{(0)}.$$

Now say  $\bar{u}_b = \nu$ . Call  $i'$  the first step such that  $\bar{u}_b^{(i')} = \nu$ . If  $i' = 0$  or  $i' = 1$  then  $\bar{u}_b = \nu \geq (1 - (|\tilde{\mathcal{B}}| - 1)\nu)\nu \geq (1 - (|\tilde{\mathcal{B}}| - 1)\nu) \bar{u}_b^{(0)}$ . Finally, if  $i' > 1$  then

$$\bar{u}_b = \nu \geq \bar{u}_b^{(i'-1)} = \left(1 - B^{(i'-2)}\nu\right) u_b / \left(\sum_{b' \mid \bar{u}_{b'}^{(i'-2)} > \nu} u_{b'}\right) \geq (1 - (|\tilde{\mathcal{B}}| - 1)\nu) \bar{u}_b^{(0)}.$$

Thus in all cases  $\bar{u}_b \geq (1 - (|\tilde{\mathcal{B}}| - 1)\nu) \bar{u}_b^{(0)}$ .  $\square$

We now turn to the main projection algorithm.

---

**Algorithm 2** PROJECTION ALGORITHM II

---

**Input :** Non-negative numbers  $(u_b)_{b=1}^{|\tilde{\mathcal{B}}|}$ , with  $\sum_{b=1}^{|\tilde{\mathcal{B}}|} u_b > 0$ , and a positive number  $\nu \leq 1/|\tilde{\mathcal{B}}|$ .

**Output:**  $(\bar{u}_b)_{b=1}^{|\tilde{\mathcal{B}}|}$  such that  $\sum_{b=1}^{|\tilde{\mathcal{B}}|} \bar{u}_b = 1$  and  $\bar{u}_b \geq \nu$  for all  $b$ .

```

1:  $\bar{u}_b^{(0)} \leftarrow u_b / (\sum_{b'=1}^{|\tilde{\mathcal{B}}|} u_{b'})$ 
2:  $\mathcal{C}^{(0)} \leftarrow \emptyset$ 
3:  $i \leftarrow 1$ 
4: while there is a  $b \notin \mathcal{C}^{(i-1)}$  with  $\bar{u}_b^{(i-1)} \leq \nu$  do
5:   Pick  $b^{(i-1)} \in \{b \mid \bar{u}_b^{(i-1)} \leq \nu\} \setminus \mathcal{C}^{(i-1)}$ 
6:    $\mathcal{C}^{(i)} \leftarrow \mathcal{C}^{(i-1)} \cup \{b^{(i-1)}\}$ 
7:   for  $b = 1, \dots, |\tilde{\mathcal{B}}|$  do
8:     if  $b \in \mathcal{C}^{(i)}$  then
9:        $\bar{u}_b^{(i)} \leftarrow \nu$ 
10:    else
11:       $\bar{u}_b^{(i)} \leftarrow (1 - i\nu) u_b / (\sum_{b' \notin \mathcal{C}^{(i)}} u_{b'})$ 
12:    $i \leftarrow i + 1$ 
13: for  $b = 1, \dots, |\tilde{\mathcal{B}}|$  do
14:    $\bar{u}_b \leftarrow \bar{u}_b^{(i-1)}$ 
```

---

An example run of algorithm [2](#) is visualized in figure [S4](#) (top row). Clearly this algorithm returns  $\bar{u}_b = \nu$  if  $\nu = 1/|\tilde{\mathcal{B}}|$  and all the following results are trivial. Thus below we will assume  $\nu < 1/|\tilde{\mathcal{B}}|$ .

*Remark 6.* We will first consider an alternative representation of the algorithm.

Given a  $\mathcal{C} \subset \tilde{\mathcal{B}}$ , call

$$u^{\mathcal{C}} = \nu \frac{\sum_{b \notin \mathcal{C}} u_b}{1 - |\mathcal{C}|\nu}$$

and if  $u^{\mathcal{C}} > 0$ , define

$$\bar{u}_b^{\mathcal{C}} := (1 - |\mathcal{C}|\nu) u_b / \left(\sum_{b' \notin \mathcal{C}} u_{b'}\right) = \nu u_b / u^{\mathcal{C}}$$

for  $b \notin \mathcal{C}$  and  $\bar{u}_b^{\mathcal{C}} = \nu$  for  $b \in \mathcal{C}$ ; so one gets  $\bar{u}_b^{(\tilde{i})} = \bar{u}_b^{\mathcal{C}^{(\tilde{i})}}$  at each iteration  $\tilde{i}$ . If  $b \notin \mathcal{C}$ ,  $\bar{u}_b^{\mathcal{C}} \leq \nu$  if and only if  $u_b \leq u^{\mathcal{C}}$ .

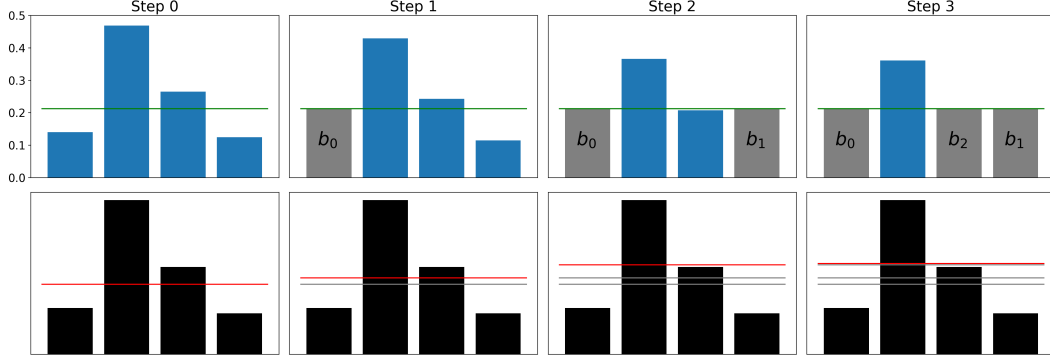

Figure S4: Example application of algorithm 2.  $(\bar{u}_b^{(i)})_b$  at the end of each step of the algorithm is shown on the top row with  $\nu$  in green and those elements in  $\mathcal{C}^{(i)}$  in grey.  $(u_b)_{b=1}^{|\tilde{\mathcal{B}}|}$  is shown as black bars in the plots in the bottom row with  $u^{\mathcal{C}^{(i)}}$  shown as a red line.  $u^{\mathcal{C}^{(j)}}$  for previous steps  $j < i$  are also shown on the bottom row as grey lines. The scale of the inputs  $(u_b)_{b=1}^{|\tilde{\mathcal{B}}|}$  is of no consequence for the algorithm.

Say  $b \notin \mathcal{C}$  and call  $\mathcal{C}' := \{b\} \cup \mathcal{C}$ .

$$u^{\mathcal{C}'} - u^{\mathcal{C}} = \nu \frac{(\sum_{b' \notin \mathcal{C}} u_{b'}) - u_b(1 - |\mathcal{C}|\nu)}{(1 - |\mathcal{C}'|\nu)(1 - |\mathcal{C}|\nu)} = \frac{\nu}{1 - |\mathcal{C}'|\nu} (u^{\mathcal{C}} - u_b).$$

Thus  $u^{\mathcal{C}'} \geq u^{\mathcal{C}}$  if and only if  $u_b \leq u^{\mathcal{C}}$  with equality if and only if  $u_b = u^{\mathcal{C}}$ .

We can see that at iteration  $i$  the next  $b^{(i-1)}$  is chosen from  $\{b \mid \bar{u}_b^{(i-1)} \leq \nu\} \setminus \mathcal{C}^{(i-1)} = \{b \mid u_b \leq u^{\mathcal{C}^{(i-1)}}\} \setminus \mathcal{C}^{(i-1)}$ , i.e. from those  $b$  with  $u_b$  below the threshold  $u^{\mathcal{C}^{(i-1)}}$ . Thus,  $u^{\mathcal{C}^{(0)}} \leq u^{\mathcal{C}^{(1)}} \leq \dots$ . This is reflected in figure S4 (bottom row).

By induction (or from inspection of figure S4), one may show that all the elements  $b$  of  $\mathcal{C}^{(i)}$  must have  $u_b$  below the threshold  $u^{\mathcal{C}^{(i-1)}}$  and the algorithm is complete only when all  $b$  with  $u_b$  below the threshold  $u^{\mathcal{C}^{(i)}}$  are inside  $\mathcal{C}^{(i)}$ . In other words, for  $i < I$  (where  $I$  is the final iteration) we have  $\mathcal{C}^{(i)} \subsetneq \{b \mid u_b \leq u^{\mathcal{C}^{(i)}}\}$ , and  $\mathcal{C}^{(I)} = \{b \mid u_b \leq u^{\mathcal{C}^{(I)}}\}$ .

The important points from the above remark are summarized as:

**Lemma 25.** 1) Given a  $\mathcal{C} \subset \tilde{\mathcal{B}}$ , say  $b \notin \mathcal{C}$  and call  $\mathcal{C}' := \{b\} \cup \mathcal{C}$ .  $u^{\mathcal{C}'} \geq u^{\mathcal{C}}$  if and only if  $u_b \leq u^{\mathcal{C}}$  with equality if and only if  $u_b = u^{\mathcal{C}}$ .

2)  $u^{\mathcal{C}^{(0)}} \leq u^{\mathcal{C}^{(1)}} \leq \dots$ .

3) If the algorithm ends on step  $I$ ,  $\mathcal{C}^{(i)} \subseteq \{b \mid u_b \leq u^{\mathcal{C}^{(i-1)}}\}$  for all  $i \leq I$ ,  $\mathcal{C}^{(i)} \subsetneq \{b \mid u_b \leq u^{\mathcal{C}^{(i)}}\}$  for  $i < I$ , and  $\mathcal{C}^{(I)} = \{b \mid u_b \leq u^{\mathcal{C}^{(I)}}\}$ .

**Proposition 26.** Say algorithm 2 is applied to non-negative numbers  $(u_b)_{b \in \tilde{\mathcal{B}}}$  with  $\sum_b u_b > 0$ . Define  $(\bar{u}_b)_b$ ,  $((\bar{u}_b^{(i)})_b)_i$  and  $(\mathcal{C}^{(i)})_i$  as in the algorithm. Say the algorithm terminates at step  $I$ .

1) The output of the algorithm is the same regardless of the choice of  $(b_0, b_1, \dots)$ .

2) The output of the algorithm is the same as that of algorithm 1.

3) we can replace lines 4 and 5 of algorithm 2 with

4: **while** there is a  $b \notin \mathcal{C}^{(i-1)}$  with  $\bar{u}_b^{(i-1)} < \nu$  **do**

5: **Pick**  $b^{(i-1)} \in \{b \mid \bar{u}_b^{(i-1)} < \nu\} \setminus \mathcal{C}^{(i-1)}$

and receive the same output. With this adjustment,  $I < |\tilde{\mathcal{B}}|$ .

4) Say  $b \notin \mathcal{C}^{(i)}$ .  $\bar{u}_b^{(i-1)} - \bar{u}_b^{(i)} \leq |\tilde{\mathcal{B}}|(\nu - \bar{u}_{b^{(i-1)}}^{(i-1)})$  so that  $\bar{u}_b^{(i-1)}$  is close to  $\bar{u}_b^{(i)}$  if  $\bar{u}_{b^{(i-1)}}^{(i-1)}$  is close to  $\nu$ .

*Proof.* 1) Say the choices  $(b^{(0)}, \dots, b^{(I)})$  were made when running the algorithm. Consider a different sequence of choices  $(b'^{(0)}, \dots, b'^{(I')})$  to produce  $\mathcal{C}'^{(I')}$ . Note that by lemma 25,  $\mathcal{C} := \mathcal{C}^{(I)} = \{b \mid u_b \leq u^{\mathcal{C}^{(I)}}\}$  and  $\mathcal{C}' := \mathcal{C}'^{(I')} = \{b \mid u_b \leq u^{\mathcal{C}'^{(I')}}\}$ . Without loss of generality assume  $\mathcal{C} \supsetneq \mathcal{C}'$  so  $u^{\mathcal{C}} > u^{\mathcal{C}'}$ . We will show that this leads to a contradiction. Pick the smallest  $i \leq I$  such that  $u^{\mathcal{C}^{(i)}} > u^{\mathcal{C}'}$ . Then  $u^{\mathcal{C}^{(i-1)}} \leq u^{\mathcal{C}'}$ , so by lemma 25,  $\mathcal{C}^{(i)} \subseteq \mathcal{C}'$ .

Pick an enumeration  $(\tilde{b}_1, \dots, \tilde{b}_J) = (\mathcal{C}' \setminus \mathcal{C}^{(i)})$ .  $u_{\tilde{b}_1} \leq u^{\mathcal{C}'} \leq u^{\mathcal{C}^{(i)}}$  so  $u^{\mathcal{C}^{(i)} \cup \{\tilde{b}_1\}} \geq u^{\mathcal{C}^{(i)}}$ . By induction, one may show that  $u^{\mathcal{C}'} = u^{\mathcal{C}^{(i)} \cup (\mathcal{C}' \setminus \mathcal{C}^{(i)})} \geq u^{\mathcal{C}^{(i)} \cup \{\tilde{b}_1, \dots, \tilde{b}_{J-1}\}} \geq \dots \geq u^{\mathcal{C}^{(i)} \cup \{\tilde{b}_1\}} \geq u^{\mathcal{C}^{(i)}}$ . This contradicts the choice of  $i$  above. Thus,  $\mathcal{C} = \mathcal{C}'$  and  $I = |\mathcal{C}| = |\mathcal{C}'| = I'$ . Moreover, since the final output  $(\bar{u}_b)_{b=1}^{|\tilde{\mathcal{B}}|}$  of the algorithm can be defined purely in terms of the final set  $\mathcal{C}^{(i)}$ , the output must be identical among runs of the algorithm.

2) Consider choosing  $(b^{(0)}, \dots, b^{(i)})$  as such: first pick  $\{b^{(0)}, \dots, b^{(i_1-1)}\} = \{b \mid \bar{u}_b^{(0)} \leq \nu\}$ , which we know can be done since by lemma 25,  $\bar{u}_b^{(0)} \leq \nu$  if and only if  $u_b \leq u^{\mathcal{C}^{(i_1)}}$  and  $u^{\mathcal{C}^{(i_1)}} \leq u^{\mathcal{C}^{(i_1+1)}} \leq \dots$ . This is equivalent to one step of the while loop of algorithm 1. Then choose  $\{b^{(i_1)}, \dots, b^{(i_2-1)}\} = \{b \mid \bar{u}_b^{(i_1)} \leq \nu\} \setminus \mathcal{C}^{(i_1)}$ , which we can do by similar logic. This is equivalent to the second step of the while loop of algorithm 1. Continuing the construction in the same way, by conclusion (1) above, we get that the outputs of algorithms 1 and 2 are identical.

3) Note, by lemma 25, picking a  $b^{(i-1)}$  with  $\bar{u}_{b^{(i-1)}}^{(i-1)} = \nu$  gives  $u^{\mathcal{C}^{(i)}} = u^{\mathcal{C}^{(i-1)}}$  and  $\bar{u}_b^{(i)} = \bar{u}_b^{(i-1)}$  for all  $b$ . Say  $(b_0, \dots, b_i)$ ,  $i < I$  are selected in the algorithm such that  $\bar{u}_{b_j}^{(j)} < \nu$  for each  $j \leq i$  and all  $b \in \{b \mid \bar{u}_b^{(i)} \leq \nu\} \setminus \mathcal{C}^{(i)}$  have  $\bar{u}_b^{(i)} = \nu$ , then  $(\bar{u}_{b'}^{(i+1)})_{b'} = (\bar{u}_{b'}^{(i)})_{b'}$  and all  $b \in \{b \mid \bar{u}_b^{(i+1)} \leq \nu\} \setminus \mathcal{C}^{(i+1)}$  have  $\bar{u}_b^{(i)} = \nu$ . Continuing by induction demonstrates property (3). That  $I < |\tilde{\mathcal{B}}|$  follows by the same logic as conclusion (4) in proposition 24 on algorithm 1.

4) Say  $b \notin \mathcal{C}^{(i)}$ ,

$$\begin{aligned} \bar{u}_b^{(i-1)} - \bar{u}_b^{(i)} &= \nu u_b \left( 1/u^{\mathcal{C}^{(i-1)}} - 1/u^{\mathcal{C}^{(i)}} \right) \\ &= \frac{u_b}{\sum_{b' \notin \mathcal{C}^{(i)}} u_{b'}} \frac{\nu(\sum_{b' \notin \mathcal{C}^{(i-1)}} u_{b'}) - u_{b^{(i-1)}}(1 - (i-1)\nu)}{\sum_{b' \notin \mathcal{C}^{(i-1)}} u_{b'}} \\ &= \bar{u}_b^{(i)}(1 - i\nu)^{-1}(\nu - \bar{u}_{b^{(i-1)}}^{(i-1)}) \\ &\leq |\tilde{\mathcal{B}}|(\nu - \bar{u}_{b^{(i-1)}}^{(i-1)}) \end{aligned} \tag{40}$$

with the last inequality since  $i \leq |\tilde{\mathcal{B}}| - 1$  and  $\nu \leq 1/|\tilde{\mathcal{B}}|$ . □

Next we show that the projection defined by algorithm 26 is continuous.

**Lemma 27.** Say  $0 < \nu \leq 1/|\tilde{\mathcal{B}}|$  and  $((u_{j,b})_{b=1}^{|\tilde{\mathcal{B}}|})_{j=1}^\infty$  is a sequence of sets of non-negative numbers, each with at least one positive element, with  $u_{j,b} \rightarrow u_b$  for each  $b$  as  $j \rightarrow \infty$ , where  $(u_b)_{b=1}^{|\tilde{\mathcal{B}}|}$  is set of non-negative numbers with at least one positive element. Apply algorithm 1 or 2 to each set  $((u_{j,b})_{b=1}^{|\tilde{\mathcal{B}}|})_{j=1}^\infty$  to get  $((\bar{u}_{j,b})_{b=1}^{|\tilde{\mathcal{B}}|})_{j=1}^\infty$  and to  $(u_b)_{b=1}^{|\tilde{\mathcal{B}}|}$  to get  $(\bar{u}_b)_{b=1}^{|\tilde{\mathcal{B}}|}$ . Then  $u_{j,b} \rightarrow \bar{u}_b$  for all  $b$ .

*Proof.* Define  $\bar{u}_{j,b}^{(i)}$  as in the steps of algorithm 2, with  $b^{(0)}, b^{(1)}, \dots$  to be defined below. Say  $\bar{u}_{b^{(0)}}^{(0)} < \nu$ . Eventually,  $\bar{u}_{j,b^{(0)}}^{(0)} < \nu$  and thus it becomes possible to pick  $b^{(0)}$  in the first step of the algorithm for all large enough  $j$ . Then, we get  $\bar{u}_{j,b^{(0)}}^{(1)} = \nu = \bar{u}_{b^{(0)}}^{(1)}$ . For  $b \neq b^{(0)}$ ,

$\bar{u}_{j,b}^{(1)} = \nu u_{j,b}/u_j^{C^{(1)}}$  as defined as part of lemma [25].  $u^{C^{(1)}}$  is a continuous function of  $(u_b)_{b=1}^{|\tilde{\mathcal{B}}|}$  so that  $\bar{u}_{j,b}^{(1)} \rightarrow \bar{u}_b^{(1)}$  for all  $b$ . Using the same logic, for large enough  $j$ , we may pick an  $b^{(1)}$  with  $\bar{u}_{j,b^{(1)}}^{(1)} < \nu$  and see  $\bar{u}_{j,b}^{(2)} \rightarrow \bar{u}_b^{(2)}$  for all  $b$ . We may continue as such until the algorithm terminates for  $(u_b)_{b=1}^{|\tilde{\mathcal{B}}|}$  by property (3) in proposition [26]. Thus, for some  $i$ , we have that  $\bar{u}_{j,b}^{(i)} \rightarrow \bar{u}_b$  for all  $b$ .

Note each  $(u_{j,b}^{(i)})_{b=1}^{|\tilde{\mathcal{B}}|}$  may require another  $|\tilde{\mathcal{B}}| - i - 1$  steps for the algorithm to complete. For large enough  $j$ , we have the implication  $\bar{u}_b > \nu \implies \bar{u}_{j,b}^{(i)} > \nu$  for all  $b$  so that if for a  $b$ ,  $\bar{u}_{j,b}^{(i)} < \nu$ , then  $\bar{u}_{j,b}^{(i)} \rightarrow \bar{u}_b = \nu$ . Applying property (4) in proposition [26] to each of the remaining steps of the algorithm applied to  $(u_{j,b})_{b=1}^{|\tilde{\mathcal{B}}|}$  for high enough  $j$ , considering  $\bar{u}_{j,b}^{(i)} \rightarrow \bar{u}_b$  for all  $b$ , we can see that  $\bar{u}_{j,b} \rightarrow \bar{u}_b$  for all  $b$ .  $\square$

Finally, we can show that the projection algorithms [1] and [2] indeed return the MLE on the sieve  $\mathcal{S}$ , given observed kmer transition counts.

**Proposition 28.** *Given data  $X_1, \dots, X_N$ , a lag  $L$ , and a positive number  $\nu < 1/|\tilde{\mathcal{B}}|$ , say  $\bar{v}$  is an MLE in  $\mathcal{S} := \{v \in \Delta_{|\tilde{\mathcal{B}}|}^{\mathcal{B}_L^0} \mid \forall k, b, v_{k,b} \geq \nu\}$ . For every  $L$ -mer  $k$  that has been seen in the data,  $(\bar{v}_{k,b})_{b \in \tilde{\mathcal{B}}}$  is equal to the output of algorithm [1] or [2] applied to  $(\#(k, b))_{b \in \tilde{\mathcal{B}}}$  where  $\#(k, b)$  is the number of times  $k$  is seen in the data immediately preceding  $b$ .*

*Proof.* The likelihood of the data under a  $p_v \in \mathcal{M}_L$  is

$$\sum_k \sum_b \#(k, b) \log(v_{k,b}).$$

Thus, the MLE in  $\mathcal{S}$  can be found by finding, for each  $k$  with  $\#k > 0$ ,

$$\operatorname{argmax}_{v_k \in \Delta^{(0)}} \sum_b \#(k, b) \log(v_{k,b})$$

where  $\Delta^{(0)} := \{v_k \in \Delta_{\tilde{\mathcal{B}}} \mid \text{for all } b, v_{k,b} \geq \nu\}$ .

Say  $k$  has been seen in the data, so the MLE on  $\Delta_{\tilde{\mathcal{B}}}$ ,  $v_k^{(0)}$ , is unique and satisfies  $v_{k,b}^{(0)} \propto \#(k, b)$ . Call  $\hat{v}_k$  an MLE on  $\Delta^{(0)}$ . Say  $v_k^{(0)} \notin \Delta^{(0)}$  so that for some  $b$ ,  $v_{k,b}^{(0)} < \nu$ . By the uniqueness of the MLE, the likelihood of the data under  $v_k^{(0)}$  must be strictly greater than under  $\hat{v}_k$ . Connecting  $\hat{v}_k$  and  $v_k^{(0)}$  by a line, considering the concavity of the log likelihood function, the likelihood must be decreasing from  $v_k^{(0)}$  to  $\hat{v}_k$ . As the likelihood function is analytic and not constant on the line, it must be strictly decreasing. Thus the line cannot intersect  $\Delta^{(0)}$  except at  $\hat{v}_k$ . For every  $b$ ,  $\lambda \hat{v}_{k,b} + (1 - \lambda)v_{k,b}^{(0)} \geq \nu$  for all  $\lambda \in [0, 1]$  if  $v_{k,b}^{(0)} \geq \nu$ ; for all  $\lambda \in [c, 1]$  for a  $c < 1$  if  $v_{k,b}^{(0)} < \nu$  and  $\hat{v}_{k,b} > \nu$ ; and only for  $\lambda = 1$  if  $v_{k,b}^{(0)} < \nu$  and  $\hat{v}_{k,b} = \nu$ . Therefore, for some  $b^{(0)}$  such that  $v_{k,b^{(0)}}^{(0)} < \nu$  we have  $\hat{v}_{k,b^{(0)}} = \nu$ .

Call  $v_k^{(1)}$  the MLE on  $\{v_k \in \Delta_{\tilde{\mathcal{B}}} \mid v_{k,b^{(0)}} = \nu\}$ . Using Lagrange multipliers again, one may see that

$$v_{k,b}^{(1)} = (1 - \nu) \frac{(k, b)}{\sum_{b \neq b^{(1)}} \#(k, b)}$$

for  $b \neq b^{(0)}$ . Note that  $v_k^{(1)}$  is the result of one step of applying algorithm [2] to  $v_k^{(0)}$  using  $b^{(0)}$ . Call  $\Delta^{(1)} := \{v_k \in \Delta_{\tilde{\mathcal{B}}} \mid \text{for all } b, v_{k,b} \geq \nu \text{ and } v_{k,b^{(1)}} = \nu\}$  so  $\hat{v}_k \in \Delta^{(1)}$ . One may perform the same analysis as above to see that if for some  $b$ ,  $v_{k,b}^{(1)} < \nu$ , then there is a  $b^{(1)}$  such that  $v_{k,b^{(1)}}^{(1)} < \nu$  and  $\hat{v}_{k,b^{(1)}} = \nu$ .

We may then construct  $v_k^{(2)}, v_k^{(3)}, \dots$  by applying algorithm [2], picking  $b^{(i)}$ . Defining  $\Delta^{(i)}$  in analogy to  $\Delta^{(0)}$  and  $\Delta^{(1)}$ , the algorithm stops at step  $i$  when  $v_k^{(i)} \in \Delta^{(i)}$  and  $\hat{v}_k = v_k^{(i)} = \bar{v}_k$ . That  $\bar{v}_k$  is unique follows from property (2) in remark [26].  $\square$



### H.3 Bayesian consistency

In this section we take a Bayesian approach to inferring a subexponential  $p^*$  from data  $X_1, X_2, \dots \sim p^*$  iid. We put a prior on  $L$ , with support over all  $L > 0$ , to construct a nonparametric Bayesian model and then study the consistency and concentration rate of its posterior. Recall that the Bernstein von-Mises theorem states that given some regularity conditions, for a Bayesian parametric model, the posterior concentrates in a neighborhood centered at the data-generating distribution, with radius proportional to  $1/\sqrt{N}$ . For nonparametric models in general, and (as we shall see) the BEAR model in particular, the concentration rate of the posterior can be strictly slower than  $\sqrt{N}$  [23, 61].

In order to guarantee consistency and derive a concentration rate, we will, instead of placing a prior directly on  $L$ , place a prior on sieves constructed similarly to those in section H.1. In particular, define for all  $L, \nu' > 0$  and  $\nu > 0$  the sieve

$$\mathcal{S}(\nu', \nu, L) = \{v \in \Delta_{\mathcal{B}}^{\mathcal{B}_L^o} \mid \forall k, v_{k,\$} \geq \nu \text{ and } v_{k,b} \geq \nu' \forall b \in \mathcal{B}\}$$

where  $\nu$  is a lower bound on the stop transition probability and  $\nu'$  is a lower bound on all other transitions. In particular, we will define a prior over the sieves that depends on how well a distribution from each sieve can match  $p^*$ . Define the sieve approximation mismatch

$$\xi(\nu', \nu, L) = \min_{v \in \mathcal{S}(\nu', \nu, L)} \mathbb{E} \log^2 \left( \frac{p^*(X)}{p_v(X)} \right).$$

In the next section, we will show that we can guarantee  $\xi$  is sufficiently small by using the fact that  $p^*$  is subexponential. Here, we define the prior.

We may now define our prior:

**Condition 29.** Assume, for monotonic sequences  $(\nu_m)_m, (L_m)_m$ , and a distribution on the natural numbers  $\pi$ ,

$$\begin{aligned} \log(\nu_m^{-1}) &\sim m^{c_1} \\ |\mathcal{B}|^{L_m} &\sim m^{c_2} \\ \xi(\nu_m, \nu_m, L_m) &\lesssim m^{-c_3} \\ \log \pi(m) &\sim -m^\omega \end{aligned}$$

with  $c_1, c_2, c_3 > 0$  and  $1 > c_1 + c_2$ .  $c_3$  must obey the following condition: calling  $\delta = 1 - \frac{1-(c_1+c_2)}{c_3/2}$ ,  $\delta > 0$  and  $(1-\delta)^{-1}(c_1+c_2) \geq \omega > c_1 + c_2$ . Consider positive numbers  $(\alpha_{k,b})_{L \geq 1, k \in \mathcal{B}_L^o, b \in \mathcal{B}}$  such that  $\sup \alpha_{k,b} < \infty$  and  $\inf \alpha_{k,b} > 0$ . Consider a prior  $\Pi$  on the disjoint union  $\sqcup_{m=1}^\infty \mathcal{S}(0, \nu_m, L_m)$  that factorizes as such:

$$\Pi(p_v) = \pi(m) \prod_{k \in \mathcal{B}_{L_m}^o} \Pi_k(v_k) \text{ if } p_v \in \mathcal{S}_m.$$

where for a  $k \in \mathcal{B}_{L_m}^o$ ,  $\Pi_k$  is a restricted and renormalized Dirichlet $(\alpha_{k,b})_{b \in \mathcal{B}}$  prior on the simplex in  $\mathcal{S}(0, \nu_m, L_m)$  corresponding to transition coefficients out of  $k$ .

Note as well the difference between the sieve we approximate  $p^*$  with  $(\mathcal{S}(\nu_m, \nu_m, L_m))$  and the one our prior is defined over  $(\mathcal{S}(0, \nu_m, L_m))$ . It is best to consider the constraints on  $c_1, c_2, \omega$  with the fact that  $c_3$  is limited in the values it may take on by how well  $p^*$  can be approximated by finite lag Markov models. Our main result will be the consistency of the posterior under this prior and the calculation of its concentration rate.

*Remark 7.* Using the techniques in section H.2, we can see that the maximum *a posteriori* estimate on each sieve  $\mathcal{S}(0, \nu_m, L_m)$  has, for every  $k$  that has been seen in the data,

$$v_{k,b} \propto \#(k, b) + \alpha_{k,b}$$

if  $\frac{\#(k, \$) + \alpha_{k, \$}}{\sum_{b' \neq \$} (\#(k, b') + \alpha_{k, b'})} \geq \nu_m$ ; otherwise,  $v_{k, \$} = \nu_m$  but we still have  $v_{k,b} \propto \#(k, b) + \alpha_{k,b}$  for  $b \in \mathcal{B}$ . One may then compare the densities of the maximum *a posteriori* estimators in each sieve across  $L$  to get the maximum *a posteriori* estimator of the entire posterior.

We now discuss two interpretations of this prior. On the one hand,  $\Pi = \sum_{L=1}^{\infty} \sum_{m \mid L_m=L} \pi_{\text{lag}}(m) \Pi(\cdot \mid \mathcal{S}(0, \nu_m, L_m))$  and thus, since  $\mathcal{S}(0, \nu_m, L_m) \subset \mathcal{M}_{L_m}$ , and the fact that multiple  $m$  correspond to the same  $L_m$ , the prior can be interpreted as similar to putting a prior on the lag, with the standard Dirichlet priors on each  $\mathcal{M}_L$ , but with the prior having a "staircase" shape for very small stopping probabilities. On the other hand, we have carefully chosen the values of  $\nu_m$  and  $L_m$  in order to balance the size of  $\mathcal{S}_m$  against the amount of information about  $p^*$  received from  $m$  datapoints. How this works will become clear in the proof of theorem [35](#).

In section [H.3.1](#) we will show that there exists a  $c_3$  such that  $\xi(\nu_m, \nu_m, L_m) \lesssim m^{-c_3}$ , i.e.,  $p^*$  may be efficiently approximated by the sieves. Then we will derive our main result with the concentration rate in section [H.3.2](#). Finally we describe how to use this result in practice on real data in section [H.3.3](#). Throughout we will consider a data generating distribution  $p^*$  and all expectations will be with respect to the data generating distribution unless otherwise stated.

### H.3.1 Approximating subexponential sequence distributions

In this section we will be interested in finding an asymptotic upper bound for  $\xi(\nu_m, \nu_m, L_m)$  of the form  $m^{-c_3}$ , thus showing that a prior as in Condition [29](#) exists (proposition [32](#)). The result relies on the assumption that  $p^*$  is subexponential; our main consistency result (theorem [35](#)) would only require  $\mathbb{E}|X|^2 < \infty$  if Condition [29](#) were somehow otherwise satisfied. In its essence, this section is about constructing approximations to subexponential sequence distributions, with control not only over the expected log ratio of  $p^*$  and the approximating distribution  $p$  – the KL divergence,  $\mathbb{E} \log(p^*(X)/p(X))$  – but also over the variance of this log ratio – i.e. control of  $\mathbb{E} \log^2(p^*(X)/p(X))$ . We will make use of lemma [3](#) but need another construction and technical lemma.

Note that if  $p^*$  is a distribution on  $S$  and  $X \in S$ ,

$$p^*(X) = p^*(X_1 \dots) p^*(X_{1:2} \dots \mid X_1 \dots) \dots p^*(X_{1:|X|} \mid X_{1:|X|-1} \dots)$$

where, recall, for a sequence  $Y$ , possibly not terminated by \$,  $p^*(Y \dots) = p^*(\{X \in S \mid X_i = Y_i \ \forall i \leq |Y|\})$ . Thus a probability distribution on  $S$  may be described by its infinite-lag transition probabilities  $p^*((Y, b) \dots \mid Y \dots)$  for sequences  $Y$  not terminated by \$ and  $b \in \mathcal{B}$ , ignoring those  $Y$  with  $p^*(Y \dots) = 0$ . Infinite-lag transition probabilities were considered in the construction of  $p_L^*$  in proposition [3](#). Below we will be interested in constructing another distribution from  $p$  by projecting, for some  $L$ , the transition probabilities at each  $Y$  with  $|Y| < L$  onto  $\{v \in \Delta_{|\mathcal{B}|} \mid v_b \geq \nu^* \ \forall b\}$ . This first lemma will be used to guarantee the existence of this distribution.

**Lemma 30.** *Say  $p^*$  is a probability distribution on  $S$ . Given a lag  $L$  and positive numbers  $((v_{X,b})_{b \in \mathcal{B}})_{l \in \{0, \dots, L-1\}, X \in \mathcal{B}^l}$  with  $\sum_b v_{X,b} = 1$  for all  $X$ , there is a  $p^{*L}$  such that for all sequences  $Y$  not terminated by \$,*

$$p^{*L}((Y, b) \dots \mid Y \dots) = \begin{cases} v_{Y,b} & \text{if } |Y| < L \\ p^*(Yb \dots \mid Y \dots) & \text{if } |Y| \geq L \text{ and } p^*(Y \dots) > 0. \end{cases} \quad (41)$$

*Proof.* For  $X \in S, |X| \leq L$  define

$$p^{*L}(X) = \prod_{i=1}^{|X|} v_{X_{1:i-1}, X_i}.$$

For  $Y \in \mathcal{B}^L$  with  $p(Y \dots) = 0$ , define

$$p^{*L}((Y, \$)) = \prod_{i=1}^L v_{Y_{1:i-1}, Y_i}$$

and  $p^{*L}(X) = 0$  for  $X \in S$  with  $X_{1:L} = Y$  and  $X_{L+1} \neq \$$ . Finally, if  $p^*(Y \dots) > 0$  define, for all  $X \in S$  with  $X_1 \dots X_L = Y$ ,

$$p^{*L}(X) = \left( \prod_{i=1}^L v_{Y_{1:i-1}, Y_i} \right) p^*(X \mid Y \dots).$$

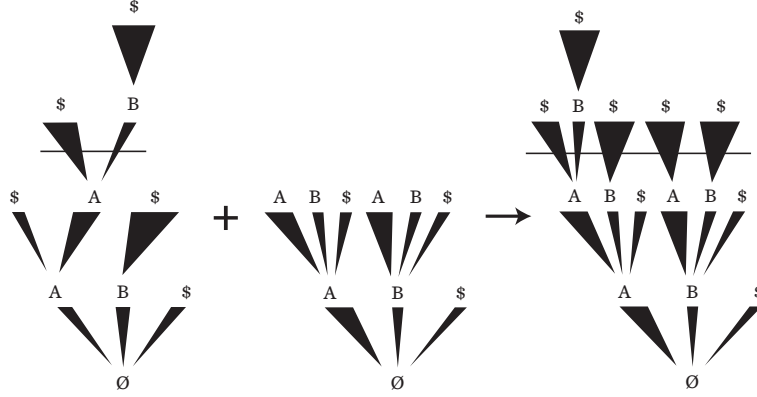

Figure S5: Example application of this construction to the distribution  $p^*$  on the left, with the  $v$  represented in the center. Transition probabilities for kmers smaller than  $L = 2$  are those defined by  $v$  while those after are those of the original distribution. Thickness of lines denote probability of particular transition.

It is not difficult to check that  $p^{*L}$  is well defined and satisfies the requirements in the statement (Fig. [S5](#)).  $\square$

Finally, we write a technical lemma:

**Lemma 31.** *There exists a positive constant  $C$  such that for any  $p^*$  and  $p$  that are distributions over  $S$ ,*

$$\mathbb{E}_{p^*} \log^2 \left( \frac{p^*(X)}{p(X)} \right) \leq \mathbb{E}_{p^*} \left[ \log^2 \left( \frac{p^*(X)}{p(X)} \right); p^*(X) > p(X) \right] + C_{\text{KL}}(p^*||p)^{1/2}.$$

*Proof.*  $x \mapsto (\log x)^2$  is differentiable with derivative  $2x^{-1} \log x$ . The derivative is bounded above on  $[1, \infty)$ , say by  $C$ . Thus, for all  $x \geq 1$ ,  $(\log x)^2 \leq (\log 1)^2 + C(x - 1) = C(x - 1)$ . Now,

$$\begin{aligned} \mathbb{E}_{p^*} \left[ \log^2 \left( \frac{p(X)}{p^*(X)} \right); p^*(X) \leq p(X) \right] &\leq C \mathbb{E}_{p^*} \left[ \left( \frac{p(X)}{p^*(X)} - 1 \right); p^*(X) \leq p(X) \right] \\ &= C (p(p(X) > p^*(X)) - p^*(p(X) > p^*(X))) \quad (42) \\ &\leq C \|p^* - p\|_{\text{TV}} \\ &\lesssim_{\text{KL}}(p^*||p)^{1/2}. \end{aligned}$$

$\square$

**Proposition 32.** *If  $\mathbb{E} \exp(t|X|) < \infty$  for some  $t > 0$  then  $\xi(\nu_m, \nu_m, L_m) \lesssim m^{-\frac{c_2}{\log |\mathcal{B}|} t}$ .*

*Proof.* To approximate  $p^*$  with a distribution in  $\mathcal{S}(\nu_m, \nu_m, L_m)$  we will use the construction in lemma [3](#), however we must make sure that the transition probabilities are not less than  $\nu_m$ . To do so, for sequences  $X$  without  $\$$ , with  $|X| < L_m$ , define  $(v_{X,b})_{b \in \mathcal{B}}$  to be the output of the application of algorithm [1](#) or [2](#) to  $(p^*((X,b) \dots |X \dots))_{b \in \mathcal{B}}$  if  $p^*(X \dots) > 0$ . For  $X$  with  $p^*(X \dots) = 0$ , make any choice of  $(v_{X,b})_b$  with  $v_{X,b} \geq \nu_m$  for all  $b$ . Thus, for all  $X, b$ ,  $v_{X,b} \geq \nu_m$ . Now, by lemma [30](#), there is a distribution  $p^{*L_m}$  with the same infinite-lag transition probabilities as  $p^*$  for  $|X| \geq L_m$  and infinite-lag transition probabilities  $(v_{X,b})_{b \in \mathcal{B}}$  for  $|X| < L_m$ . Finally perform the construction in lemma [3](#) to  $p^{*L_m}$  to produce a  $p_{L_m}^{*L_m} \in \mathcal{S}(\nu_m, \nu_m, L_m)$ .

By lemma [31](#)

$$\mathbb{E} \log^2 \left( \frac{p^*(X)}{p_{L_m}^{*L_m}(X)} \right) \lesssim \mathbb{E} \left[ \log^2 \left( \frac{p^*(X)}{p_{L_m}^{*L_m}(X)} \right); p^*(X) > p_{L_m}^{*L_m}(X) \right] + \left[ \mathbb{E} \log \left( \frac{p^*(X)}{p_{L_m}^{*L_m}(X)} \right) \right]^{1/2}.$$

To achieve our result, we will show the first of these terms is  $\lesssim m^{-\frac{c_2}{\log |\mathcal{B}|} t}$  and one may use a similar proof to make the same deduction about the second term.

First we will split the term into two that represent the "distance" from  $p^*$  to  $p_{L_m}^{*L_m}$  and that from  $p_{L_m}^{*L_m}$  to  $p_{L_m}^{*L_m}$ :

$$\begin{aligned} & \mathbb{E} \left[ \log^2 \left( \frac{p^*(X)}{p_{L_m}^{*L_m}(X)} \right); p_{L_m}^{*L_m}(X) < p^*(X) \right] \\ &= \mathbb{E} \left[ \log^2 \left( \frac{p^*(X)}{p_{L_m}^{*L_m}(X)} \right); |X| \leq L_m, p_{L_m}^{*L_m}(X) < p^*(X) \right] \\ & \quad + \mathbb{E} \left[ \log^2 \left( \frac{p^*(X)}{p_{L_m}^{*L_m}((X_1, \dots, X_{L_m}) \dots) |\tilde{\mathcal{B}}|^{-(|X|-L_m)}} \right); |X| > L_m, p_{L_m}^{*L_m}(X) < p^*(X) \right] \\ &\leq \mathbb{E} \left[ \log^2 \left( \frac{p^*(X)}{p_{L_m}^{*L_m}(X)} \right); |X| \leq L_m, p_{L_m}^{*L_m}(X) < p^*(X) \right] \\ & \quad + \mathbb{E} \left[ \log^2 \left( \frac{p^*(X)}{p_{L_m}^{*L_m}(X) |\tilde{\mathcal{B}}|^{-(|X|-L_m)}} \right); |X| > L_m, p_{L_m}^{*L_m}(X) < p^*(X) \right] \\ &\leq \mathbb{E} \left[ \log^2 \left( \frac{p^*(X)}{p_{L_m}^{*L_m}(X)} \right); |X| \leq L_m, p_{L_m}^{*L_m}(X) < p^*(X) \right] \\ & \quad + 4 \mathbb{E} \left[ \log^2 \left( \frac{p^*(X)}{p_{L_m}^{*L_m}(X)} \right); |X| > L_m, p_{L_m}^{*L_m}(X) < p^*(X) \right] \\ & \quad + 4 \log^2 (|\tilde{\mathcal{B}}|) \mathbb{E} [(|X| - L_m); |X| > L_m] \\ &\lesssim \mathbb{E} \left[ \log^2 \left( \frac{p^*(X)}{p_{L_m}^{*L_m}(X)} \right) \right] + \mathbb{E} [(|X| - L_m)^2; |X| > L_m]. \end{aligned} \tag{43}$$

Now we will show each of these two terms  $\lesssim m^{-\frac{c_2}{\log |\mathcal{B}|} t}$  in turn.

We will first consider  $\mathbb{E} [(|X| - L_m)^2; |X| > L_m]$ .

$$\begin{aligned} p^*((|X| - L_m)^2 > l) &= p^*(e^{t|X|} > e^{t(\sqrt{l} + L_m)}) \\ &\leq e^{-tL_m} \mathbb{E} [e^{t|X|}] e^{-t\sqrt{l}} \end{aligned} \tag{44}$$

by Markov's inequality, so

$$\begin{aligned} \mathbb{E} [(|X| - L_m)^2; |X| > L_m] &= \int_{L_m}^{\infty} p^*((|X| - L_m)^2 > l) dl \\ &\leq e^{-tL_m} \mathbb{E} [e^{t|X|}] \int_{L_m}^{\infty} e^{-t\sqrt{l}} dl \\ &\leq e^{-tL_m} \mathbb{E} [e^{t|X|}] 2t^{-2} (t\sqrt{L_m} + 1) e^{-t\sqrt{L_m}} \\ &= \exp \left( -tL_m - t\sqrt{L_m} - 2 \log t \right. \\ & \quad \left. + \log (t\sqrt{L_m} + 1) + \text{const.} \right) \\ &\lesssim \exp (-tL_m) \\ &\sim m^{-\frac{c_2}{\log |\mathcal{B}|} t} \end{aligned} \tag{45}$$

as desired.

For the other term in equation [43](#), again by lemma [31](#),

$$\mathbb{E} \log^2 \left( \frac{p^*(X)}{p^{*L_m}(X)} \right) \lesssim \mathbb{E} \left[ \log^2 \left( \frac{p^*(X)}{p^{*L_m}(X)} \right); p^*(X) > p^{*L_m}(X) \right] + \left[ \mathbb{E} \log \left( \frac{p^*(X)}{p^{*L_m}(X)} \right) \right]^{1/2}.$$

In this case, we will show that the first of these terms is  $\lesssim e^{-Cm^{c_1}}$  for some positive constant  $C$ , and by a similar proof one may show the same for the second. This will complete the proof of part 2.

If  $p^*(X) > p^{*L_m}(X) \geq 0$ , by the definition of  $p^{*L_m}$ ,

$$\frac{p^*(X)}{p^{*L_m}(X)} = \prod_{i=1}^{L_m \vee |X|} \frac{p^*(X_{1:i} \dots | X_{1:i-1} \dots)}{v_{X_{1:i-1}, X_i}} \leq (1 - (|\tilde{\mathcal{B}}| - 1)\nu_m)^{L_m}$$

with the inequality by property (5) in proposition [24](#). Thus,

$$\mathbb{E} \left[ \log^2 \left( \frac{p^*(X)}{p^{*L_m}(X)} \right); p^*(X) > p^{*L_m}(X) \right] \lesssim L_m^2 \nu_m^2 \lesssim \log^2(m) e^{-2Cm^{c_1}} \lesssim e^{-C'm^{c_1}}$$

for two positive constants  $C, C'$ .  $\square$

### H.3.2 Consistency and rate

The proof of theorem [35](#) relies on a consequence of theorem 2.1 of Ghosal et al. [23](#), which is stated in a simplified form herein as theorem [33](#). Intuitively, the key challenge in establishing nonparametric consistency is that the size of the space of probability measures  $\mathcal{P}$  (infinite dimensional) may overwhelm the evidence provided by the data, leading to a posterior that is too spread out. To establish consistency, theorem 2.1 of Ghosal et al. [23](#) requires that the prior over probability measures is sufficiently large on a neighborhood of  $p^*$  (denoted  $\mathfrak{B}_\eta$ ), and sufficiently small on the complement of an effectively parametric (finite dimensional) subset of  $\mathcal{P}$  (denoted  $\mathcal{P}_N$ ).

**Theorem 33.** *Say  $\mathcal{P}$  is a set of probability measures,  $p^* \in \mathcal{P}$ .  $X_1, \dots, X_N \sim p^*$  iid,  $d$  is the Hellinger distance,  $\Pi$  is a distribution on  $\mathcal{P}$ ,  $(\eta_N)_{N=1}^\infty$  is a sequence of positive numbers such that  $\eta_N \rightarrow 0$  and  $N\eta_N^2 \rightarrow \infty$ , and  $(\mathcal{P}_N)_{N=1}^\infty$  are a sequence of subsets of  $\mathcal{P}$ . Define, for positive  $\eta$ ,*

$$\mathfrak{B}_\eta = \{p \in \mathcal{P} \mid \text{KL}(p^*||p) < \eta^2, \text{Var}[\log(p^*(X)/p(X))] < \eta^2\}.$$

Then if

- i)  $\log \mathcal{N}(\eta_N/2, \mathcal{P}_N, d) \lesssim N\eta_N^2$
- ii)  $\log \Pi(\mathfrak{B}_{\eta_N}) \gtrsim -N\eta_N^2$
- iii) For an  $\epsilon > 0$ ,  $\Pi(\mathcal{P} \setminus \mathcal{P}_N) \Pi(\mathfrak{B}_{\eta_N})^{-1} e^{(1+\epsilon)N\eta_N^2} \rightarrow 0$

Then for large enough  $M$ ,

$$\Pi(B(p^*, M\eta_N) | X_1, \dots, X_N) \rightarrow 1$$

in probability, where  $B(p^*, \delta)$  is a Hellinger ball of radius  $\delta$  centered at  $p^*$

*Proof.* For some  $C$ ,

$$CN\eta_N^2 \geq \log \mathcal{N}(\eta_N/2, \mathcal{S}_N, d) \geq \log \mathcal{D}(\eta_N, \mathcal{S}_N, d).$$

Defining  $\eta'_N = \sqrt{C}\eta_N$ , condition 2.2 in theorem 2.1 of Ghosal et al. [23](#) is satisfied for the sequence  $(\eta'_N)_{N=1}^\infty$ . Note condition 2.4 is also satisfied by the above condition [ii](#)

Note by lemma 8.1 in Ghosal et al. [23](#)

$$\begin{aligned} D_N &= \int \prod_{n=1}^N \frac{p(X_n)}{p^*(X_n)} d\Pi(p) \\ &\geq \Pi(\mathfrak{B}_{\eta'_N}) \left( \frac{1}{\Pi(\mathfrak{B}_{\eta'_N})} \int_{\mathfrak{B}_{\eta'_N}} \prod_{n=1}^N \frac{p(X_n)}{p^*(X_n)} d\Pi(p) \right) \\ &\geq \Pi(\mathfrak{B}_{\eta'_N}) e^{-(1+\epsilon)N\eta_N^2} \end{aligned} \tag{46}$$

with probability  $1 - (\epsilon^2 N \eta'_N)^{-1} \rightarrow 1$ . Call the set where this occurs  $A$ . As in the proof of theorem 2.1 of Ghosal et al. [23], for large enough  $M, C'$ , we may then use condition [i] to write

$$1 - \mathbb{E}_{p^*} [\Pi(B(p^*, M\eta'_N) | X_1, \dots, X_N)] \leq 2e^{-C'N\epsilon'_N} + (1 - p^*(A)) + \mathbb{E}_{p^*} \left[ D_N^{-1} \left( \Pi(\mathcal{P} \setminus \mathcal{P}_N) + e^{-C'NM^2\epsilon_N'^2} \right); A \right]. \quad (47)$$

By conditions [ii] and [iii], this last term  $\rightarrow 0$  for large enough  $M$ . Finally, write  $M\eta'_N = (M\sqrt{C})\eta_N$  to get the result in terms of  $\eta_N$ .

□

To work with sieves without restrictions on transition probabilities to  $b \in \mathcal{B}$  we need the following technical lemma.

**Lemma 34.** Assume for positive numbers  $(\alpha_{k,b})_{L>0, k \in \mathcal{B}_L^o, b \in \tilde{\mathcal{B}}}$ ,  $\sup_{L>0, k \in \mathcal{B}_L^o, b \in \tilde{\mathcal{B}}} \alpha_{k,b} < \infty$  and  $\inf_{L>0, k \in \mathcal{B}_L^o, b \in \tilde{\mathcal{B}}} \alpha_{k,b} > 0$ . Consider independent Dirichlet $(\alpha_{k,b})_{b \in \tilde{\mathcal{B}}}$  priors on each simplex of  $\Delta_{\tilde{\mathcal{B}}}^{\mathcal{B}_L^o}$  indexed by  $k \in \mathcal{B}_L^o$ . Call the joint distribution  $\Pi$ . Then, for some  $C, \epsilon > 0$ , for all  $\nu > \nu'$  small,  $L$ ,

$$\log \frac{\Pi(\mathcal{S}(\nu', \nu, L))}{\Pi(\mathcal{S}(0, \nu, L))} \geq -C|\mathcal{B}|^L \nu'^\epsilon$$

*Proof.* Define  $\alpha^\wedge \leq \inf_{L,k,b} \alpha_{k,b}$ . Let  $Z_k \sim \text{Dirichlet}(\alpha_{k,b})_{b \in \tilde{\mathcal{B}}}$  for some  $k$ . As a property of the Dirichlet distribution,

$$\left( Z_{k,\$}, \frac{\sum_{b' \in \mathcal{B}} Z_{k,b'}}{\sum_{b' \in \tilde{\mathcal{B}}} Z_{k,b'}} \right) \perp\!\!\!\perp \left( \frac{Z_{k,b'}}{\sum_{b' \in \mathcal{B}} Z_{k,b'}} \right)_{b' \in \mathcal{B}}$$

Call this later variable  $Y_k$ , and note  $Y_k \sim \text{Dirichlet}(\alpha_{k,b})_{b \in \mathcal{B}}$ . Now for any  $b \in \mathcal{B}$ ,  $v < \nu$ , since  $(Y_{k,b}, \sum_{b' \neq b} Y_{b'}) \sim \text{Beta}(\alpha_{k,b}, \sum_{b' \neq b} \alpha_{k,b'})$ ,

$$\begin{aligned} P(Y_{k,b} < \nu'/(1-v)) &= \frac{\Gamma(\sum_{b' \in \tilde{\mathcal{B}}} \alpha_{k,b'})}{\Gamma(\alpha_{k,b})\Gamma(\sum_{b' \neq b} \alpha_{k,b'})} \int_0^{\nu'/(1-v)} x_b^{\alpha_{k,b}-1} (1-x_b)^{(\sum_{b' \neq b} \alpha_{k,b'})-1} \\ &= O(1) \int_0^{\nu'/(1-v)} x_b^{\alpha_{k,b}-1} \\ &= O((\nu'/(1-v))^{\alpha_{k,b}}). \end{aligned} \quad (48)$$

Thus, using a union bound, for some  $C$ , regardless of the choice of  $k$ ,

$$P(Y_{k,b} < \nu'/(1-v) \text{ for some } b \in \mathcal{B}) \leq C(\nu'/(1-v))^{\alpha^\wedge}.$$

Thus, for some  $C' > 0$ , calling  $F_{k,\$}$  the density of  $Z_{k,b}$ , noting  $P(Z_{k,\$} > \nu) = O(1)$  for small  $\nu$ ,

$$\begin{aligned} P(Z_{k,b} < \nu' \text{ for some } b \in \mathcal{B} \mid Z_{k,\$} > \nu) &\lesssim \int_\nu^1 P(Y_{k,b} < \nu'/(1-v) \text{ for some } b \in \mathcal{B}) dF_{k,\$}(v) \\ &\lesssim \nu'^{\alpha^\wedge} \int_\nu^1 dv v^{\alpha_{k,\$}-1} (1-v)^{\sum_{b \in \mathcal{B}} \alpha_{k,b}-1-\alpha^\wedge}. \end{aligned} \quad (49)$$

The integral is equal to the probability of a  $(\text{Beta})(\alpha_{k,\$}, \sum_{b \in \mathcal{B}} \alpha_{k,b} - \alpha^\wedge)$  distribution being greater than  $\nu$  and is thus  $O(1)$ . For small enough  $\nu, \nu'$ , for some  $C' > 0$ ,

$$\begin{aligned} \log \frac{\Pi(\mathcal{S}(\nu', \nu, L))}{\Pi(\mathcal{S}(0, \nu, L))} &= \prod_{k \in \mathcal{B}_L^o} \log P(Z_{k,b} \geq \nu' \text{ for all } b \in \mathcal{B} \mid Z_{k,\$} > \nu) \\ &\geq \log \left( (1 - C\nu'^{\alpha^\wedge})^{|\mathcal{B}_L^o|} \right) \\ &\geq -C'|\mathcal{B}_L^o| \nu'^{\alpha^\wedge} \\ &\geq -C''|\mathcal{B}|^L \nu'^{\alpha^\wedge}. \end{aligned} \quad (50)$$

□

We can now prove the main result, establishing posterior consistency and the posterior convergence rate. We show that the prior in condition [29](#) satisfies the conditions of [33](#). In particular, we use sieves  $\mathcal{S}$  to define the effectively parametric subset  $\mathcal{P}_N$  of the infinite dimensional space of probability measures  $\mathcal{P}$ , and then condition [29](#) controls the prior probability over the  $\mathfrak{B}_{\eta_N}$  and  $\mathcal{P}_N$ .

**Theorem 35.** Assume  $p^*$  is sub-exponential and thus we can choose a prior as in condition [29](#). For any large enough  $M$ ,

$$\Pi(B(p^*, MN^{-\frac{1}{2}(1-(c_1+c_2))}) | X_1, \dots, X_N) \rightarrow 1$$

in probability where  $B(p^*, \delta)$  is a Hellinger ball of radius  $\delta$  centered at  $p^*$ .

*Proof.* The proof will proceed by checking the conditions of theorem [33](#). First define a monotonic sequence  $(\nu'_m)_{m=1}^\infty$  with  $\log \nu_N^{-1} \sim N^\omega$ ,  $\xi_N = \xi(\nu_N, \nu_N, L_N)$ ,  $\mathcal{P}$  the set of distributions on  $S$ , and

$$\mathcal{P}_N = \{p_v \mid v \in \cup_{n=1}^N \mathcal{S}(\nu'_n, \nu_n, L_n)\} = \{p_v \mid v \in \mathcal{S}(\nu'_N, \nu_N, L_N)\}.$$

Throughout we will use  $\eta_N = N^{-\frac{1}{2}(1-(c_1+c_2))}$  and so checking the conditions of theorem [33](#) will demonstrate a posterior concentration rate of  $\frac{1}{2}(1-(c_1+c_2))$ .

First we will check condition [i](#). Define, for  $\zeta \in \mathbb{N}^{\mathcal{B}_{L_N}^\circ \times \tilde{\mathcal{B}}}$ ,  $\rho_N > 0$ ,

$$\hat{\mathcal{O}}_N(\zeta) = \{v \in \mathcal{S}(\nu'_N, \nu_N, L_N) \mid \forall (k, b), (1 + \rho_N)^{\zeta_{k,b}} \nu_N^b > v_{k,b} \geq (1 + \rho_N)^{\zeta_{k,b}-1} \nu_N^b\}$$

(where  $\nu_N^b = \nu'_N$  if  $b \neq \$$  and equal to  $\nu_N$  otherwise) so that  $\cup_\zeta \hat{\mathcal{O}}_N(\zeta) = \mathcal{S}(\nu'_N, \nu_N, L_N)$  (Fig. [S3](#)).

Note that for  $v_1, v_2 \in \hat{\mathcal{O}}_N(\zeta)$ ,  $\text{KL}(p_{v_1} \| p_{v_2}) \leq \log(1 + \rho_N) \mathbb{E}_{v_1} |X| \leq \rho_N \nu_N^{-1}$  the last inequality as  $p(|X| > L \mid |X| \geq L) \geq \nu_N$  where the last inequality comes from  $p(|X| = L \mid |X| \geq L) \geq \nu_N$  and a geometric sum (this is where a distinction between  $\nu_N$  and  $\nu'_N$  is necessary). Defining  $d$  as the Hellinger metric,

$$d(p_{v_1}, p_{v_2}) \leq \frac{1}{\sqrt{2}} \|p_{v_1} - p_{v_2}\|_1^{1/2} \leq \text{KL}(p_{v_1} \| p_{v_2})^{1/4} \leq (\rho_N \nu_N^{-1})^{1/4}$$

so picking  $\rho_N = \nu_N(\eta_N/2)^4$ , for  $v_1, v_2 \in \hat{\mathcal{O}}_N(\zeta)$ ,  $d(p_{v_1}, p_{v_2}) \leq \eta_N/2$ . Call  $\gamma^b = \left( \frac{\log((\nu_N^b)^{-1})}{\log(1+\rho_N)} + 1 \right)$  and note  $(1+\rho_N)^{\gamma^b-1} \nu_N^b = 1$ . Thus the number of choices of  $\zeta \in \mathbb{N}^{\mathcal{B}_{L_N}^\circ \times \tilde{\mathcal{B}}}$  that give non-empty  $\hat{\mathcal{O}}_N(\zeta)$ , is bounded above by  $\prod_{b \in \tilde{\mathcal{B}}} (\gamma^b)^{|\mathcal{B}_{L_N}^\circ|}$ . Note also that since  $\rho_N \rightarrow 0$ ,  $\gamma^b \lesssim \frac{\log((\nu_N^b)^{-1})}{\rho_N}$ . Now we can establish condition [i](#) of theorem [33](#):

$$\begin{aligned} \log \mathcal{N}(\eta_N/2, \mathcal{S}_N, d) &\leq \log \#\{\zeta \mid \hat{\mathcal{O}}_N(\zeta) \neq \emptyset\} \\ &\leq |\mathcal{B}_{L_N}^\circ| \sum_b \log(\gamma^b) \\ &\lesssim |\mathcal{B}|^{L_N} \sum_b \left( \log \log \left( (\nu_N^b)^{-1} \right) - \log(\nu_N(\eta_N/2)^4) \right) \\ &\lesssim |\mathcal{B}|^{L_N} (\log(\nu_N^{-1}) + \log(N)) \\ &\lesssim N^{c_1+c_2} \\ &\lesssim N \eta_N^2. \end{aligned} \tag{51}$$

Now we will demonstrate condition [ii](#). Define, as in theorem [33](#),

$$\begin{aligned} \mathfrak{B}_\eta &= \{p \in \mathcal{M} \mid \text{KL}(p^* \| p) < \eta^2, \text{Var}[\log(p^*(X)/p(X))] < \eta^2\} \\ &\supseteq \{p \in \mathcal{M} \mid \mathbb{E} \log^2(p^*(X)/p(X)) < \eta^4 \wedge 1\} \end{aligned} \tag{52}$$



since  $\text{Var}[\log(p^*(X)/p(X))] \vee \text{KL}(p^*||p)^2 \leq \mathbb{E} \log^2(p^*(X)/p(X))$ .

Fix  $N$ . First we will delineate a volume in  $\mathcal{S}(\nu_m, \nu_m, L_m)$  for any  $m > 0$  that is within  $\mathfrak{B}_{\eta_N}$ . Using the definition of  $\xi$ , we can label a  $v_m^* \in \mathcal{S}(\nu_m, \nu_m, L_m)$  such that  $\mathbb{E}[\log(p^*(X)/p_{v_m^*}(X))^2] \leq 2\xi_m$ . Note that if there exists a  $v \in \mathcal{S}(\nu_m, \nu_m, L_m)$  such that for some  $\rho_m > 0$  and all  $k, b$ ,  $(1 + \rho_m) \geq \frac{v_{k,b}}{v_{m,k,b}^*} \geq (1 + \rho_m)^{-1}$  then

$$\begin{aligned} \mathbb{E}[\log(p^*(X)/p_v(X))^2] &\leq 8\xi_m + 4\mathbb{E} \log^2(p_{v_m^*}(X)/p_v(X)) \\ &\leq 8\xi_m + 4\log^2(1 + \rho_m)\mathbb{E}|X|^2. \end{aligned} \quad (53)$$

Now pick, for large enough  $m$ ,

$$\rho_m = \sqrt{\frac{\eta_N^4 - 8\xi_m}{4\mathbb{E}|X|^2}} \leq \exp\left(\sqrt{\frac{\eta_N^4 - 8\xi_m}{4\mathbb{E}|X|^2}}\right) - 1$$

so that if  $(1 + \rho_m) \geq \frac{v_{k,b}}{v_{m,k,b}^*} \geq (1 + \rho_m)^{-1}$  for all  $k, b$ , then  $p_v \in \mathfrak{B}_{\eta_m}$ .

Fixing  $k$ , the probability under a  $\text{Dirichlet}(\alpha_{k,b})_b$  distribution of  $W_{m,k} = \{v_k \mid (1 + \rho_m) \geq \frac{v_{k,b}}{v_{m,k,b}^*} \geq (1 + \rho_m)^{-1} \forall b\}$  (depicted in Fig. S6(A)) is, considering the case where  $v_m^*$  is on one of the corners of the simplex  $\{v_k \mid v_{k,b} \geq \nu_m\}$ , at least

$$V_{m,k} = \left(C_1 \nu_m^{(\sum_b (\alpha_b \wedge 1 - 1))}\right) \left(C_2 (\nu_m \rho_m)^{|\tilde{\mathcal{B}}| - 1}\right)$$

where the first term is a lower bound on the density and the second on the volume of  $W_{m,k}$  and  $C_1, C_2$  are constants depending on  $|\tilde{\mathcal{B}}|$ .  $C_1 > 0$  as  $\inf_{k,b} \alpha_{k,b} > 0$ . As well, one may check that the volume is minimized should  $v_{m,k,b}^* = \nu_m$  for all but one  $b$ ; in this case, the volume forms a particular diamond-like shape with side-lengths scaled as  $\nu_m \rho_m$  and dimensionality  $|\tilde{\mathcal{B}}| - 1$  (Fig. S6(B)), (if  $v_{m,k,b}^* = 1 - (|\tilde{\mathcal{B}}| - 1)\nu_m$ , then the condition  $v_{k,b} \geq (1 + \rho_m)^{-1} v_{m,k,b}^* \gtrsim \rho_m$  does not affect the  $W_{m,k}$  for large  $m$  as  $\nu_m \rightarrow 0$ ) (Fig. S6).

Now we will lower bound the probability of  $\mathfrak{B}_{\eta_N}$  by the probability of the above defined volume for a particular  $m, m_N$ . Call  $\delta = 1 - \frac{1 - (c_1 + c_2)}{c_3/2} > 0$  and define

$$m_N = \left\lceil \left(\frac{\eta_N^4}{16C}\right)^{-1/c_3} \right\rceil \lesssim N^{1-\delta}$$

so that  $8\xi_{m_N} \leq \frac{1}{2}\eta_N^4$  for all  $m \geq m_N$ , and  $m_N \rightarrow \infty$ . Now,

$$\begin{aligned} \log(\Pi(\mathfrak{B}_{\eta_N})) &\geq \log\left(\pi(m_N) \prod_{k \in \mathcal{B}_{L_{m_N}}^o} V_{m_N,k}\right) \\ &\gtrsim \log(\pi(m_N)) + \left(|\mathcal{B}_{L_{m_N}}^o| - \sum_{k,b} \alpha_{k,b} \wedge 1\right) \log(\nu_{m_N}^{-1}) \\ &\quad - |\mathcal{B}_{L_{m_N}}^o| (|\tilde{\mathcal{B}}| - 1) \log(\rho_{m_N}^{-1}) \\ &\gtrsim \log(\pi(m_N)) - |\mathcal{B}|^{L_{m_N}} \log(\nu_{m_N}^{-1}) - |\mathcal{B}|^{L_{m_N}} \log(\rho_{m_N}^{-1}). \end{aligned} \quad (54)$$

For the first term, due to condition 29,  $(c_1 + c_2) > (1 - \delta)\omega > (1 - \delta)(c_1 + c_2)$ , so,

$$\log \pi(m_N) \sim -m_N^\omega \gtrsim -N^{(1-\delta)\omega} \gtrsim -N^{c_1+c_2}.$$

The second term has

$$|\mathcal{B}|^{L_{m_N}} \log(\nu_{m_N}^{-1}) \lesssim m_N^{(c_1+c_2)} \lesssim N^{(1-\delta)(c_1+c_2)}.$$

Finally, for the third, note that since  $8\xi_{m_N} \leq \frac{1}{2}\eta_N^4$ ,

$$\log(\rho_{m_N}^{-1}) \lesssim -\log(\eta_N^4 - 8\xi_{m_N}) \lesssim -\log(\eta_N^4) \lesssim -\log(N).$$

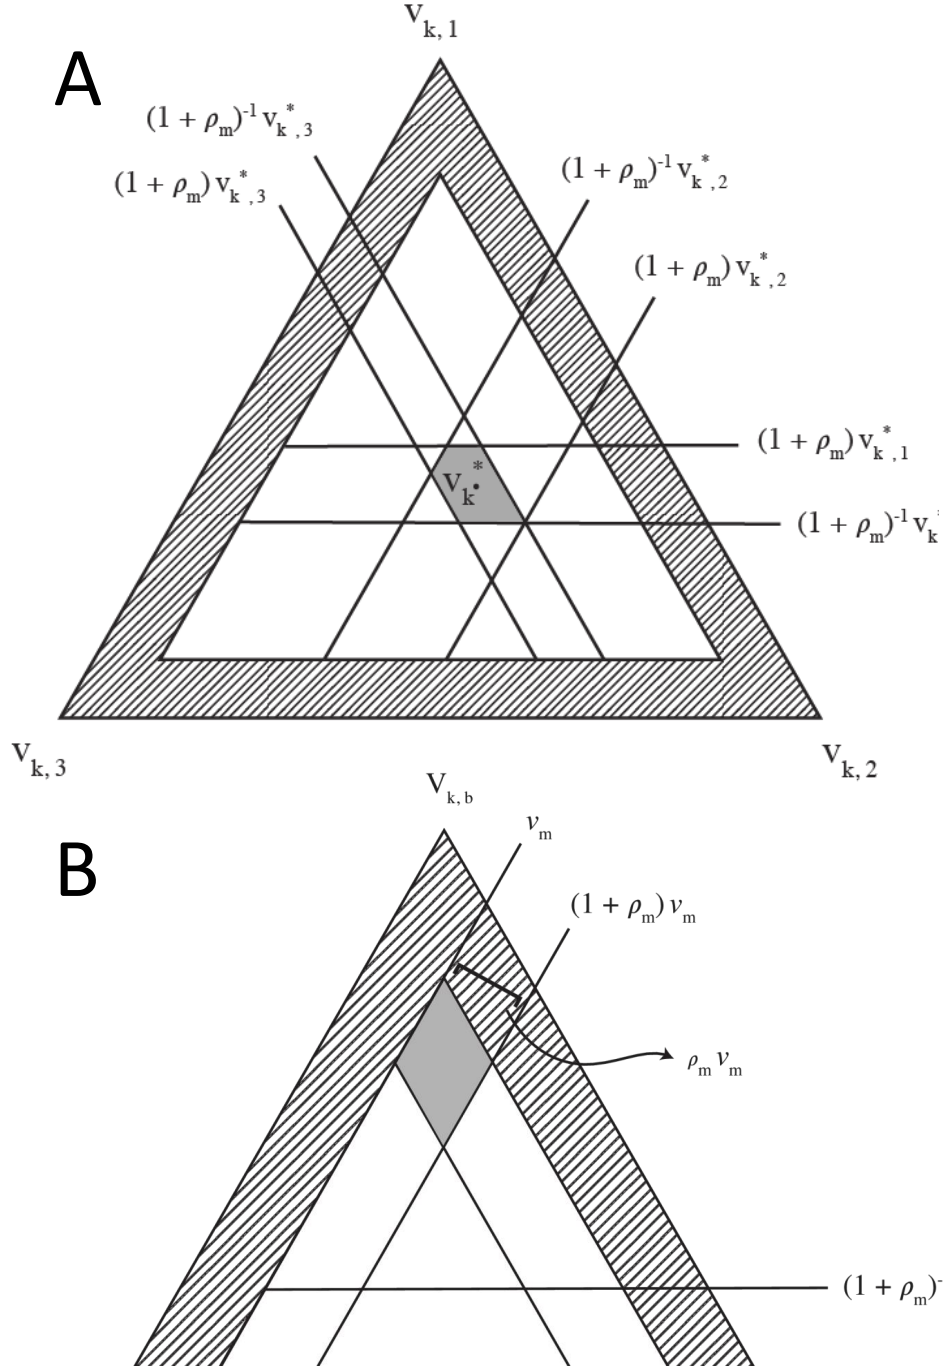

Figure S6: (A) Example of a set  $W_{m,k}$  (solid gray) where  $(1 + \rho_m) \geq \frac{v_{k,b}}{v_{m,k,b}^*} \geq (1 + \rho_m)^{-1} \forall b$  on  $\Delta_{\tilde{\mathcal{B}}}$  for a particular  $k$  and  $m$  when  $|\mathcal{B}| = 3$ . (B) Depiction of minimum volume possible. The dashed region represents those transition probabilities that have components less than  $v_m$ .

Thus,

$$\log(\Pi(\mathfrak{P}_{\eta_N})) \gtrsim -N^{(1-\delta)(1+\omega)c_2} \gtrsim -N^{(c_1+c_2)} = -N\eta_N^2.$$

Finally, for condition [iii](#), note

$$\Pi(\mathcal{P} \setminus \mathcal{P}_N) = \pi(m > N) + \sum_{m=1}^N \pi(m)(1 - \Pi(\mathcal{S}(\nu'_N, \nu_m, L_m) \mid \mathcal{S}(0, \nu_m, L_m))).$$

From lemma [34](#), we have, for  $C, C', \epsilon > 0$ , the second term is dominated by

$$\begin{aligned} \sum_{m=1}^N \pi(m) \log \frac{\Pi(\mathcal{S}(0, \nu_m, L_m))}{\Pi(\mathcal{S}(\nu'_N, \nu_m, L_m))} &\lesssim \sum_{m=1}^N |\mathcal{B}|^{L_m} \nu_N'^\epsilon \\ &\lesssim \nu_N'^\epsilon L_N |\mathcal{B}|^{L_N} \\ &\lesssim \exp(-2\epsilon C N^\omega) \end{aligned} \tag{55}$$

for some  $C > 0$ . On the other hand, since one may check that  $\pi(m+1)/\pi(m) < 1/2$  for all  $L$ , we have  $\pi(m > N) \leq \pi(N)$ . Thus,

$$\log \Pi(\mathcal{P} \setminus \mathcal{P}_N) \lesssim -N^\omega.$$

Now we may write, for any  $\epsilon > 0$ , since  $\omega > c_1 + c_2$

$$\log(\log \Pi(\mathcal{P} \setminus \mathcal{P}_N) e^{(1+\epsilon)N\eta_N^2} \Pi(\mathfrak{P}_{\eta_N})^{-1}) \lesssim -N^\omega + N^{c_1+c_2} + N^{(1-\delta)\omega} \rightarrow -\infty.$$

□

### H.3.3 Use in practice

Theorem [35](#) reveals that the choice of prior controls a kind of bias-variance tradeoff in the model's posterior. In particular, from condition [29](#) we have

$$c_3 > 2(1 - (c_1 + c_2)) \tag{56}$$

Decreasing the prior hyperparameters  $c_1$  and  $c_2$  decreases the width of the posterior distribution (which plays the role of variance). However, reducing  $c_1$  and  $c_2$  forces down  $c_3$  (by the definition of  $\xi$ ), and this reduces the weight that the prior places on larger sieves that can match the data distribution better (i.e. sieves with lower  $\xi(\nu, \nu, L)$  values), consequently increasing the model's bias. When  $c_1$  and  $c_2$  become low enough, the bias becomes overwhelming, equation [56](#) is violated, and consistency is no longer guaranteed.

In practice it is often sensible heuristically to set  $\nu_m = 0$ . In the case, for instance, of short-read sequencing data, there's relatively little correlation between the letters of the read and where it terminates. The probability of stopping is thus often similar across different kmers, even when comparing among kmers of different length. As the posterior concentrates at a roughly constant stopping probability, even a low one,  $\nu_m$  quickly becomes irrelevant as it decays to zero exponentially. When  $\nu_m = 0$ , the prior simplifies: it can be written as a distribution over lags  $\pi(L)$  times independent Dirichlet priors on each  $\mathcal{M}_L$  for  $L \in \{1, 2, \dots\}$ . The prior over lags takes the form

$$\log \pi(\{m \mid L_m = L\}) \sim -|\mathcal{B}|^{\frac{\omega}{c_2} L}.$$

Since  $\omega > c_2$ , we may write  $\frac{\omega}{c_2}$  as  $1 + c$  for a small  $c > 0$ .

## I Toy models

In this section we describe in depth our simulation experiments.

### I.1 Finite lag models

This subsection describes experiments conducted to study in practice the finite lag consistency results described in Sections [E](#) and [F](#) and includes details on the results presented in Section [2](#) and Figure [2](#).

### I.1.1 Setup

To simulate data, we used an AR model with parameters  $\theta = (A, B)$  defined by the function,

$$f_k(A, B) = \text{softmax} \left( (1 - \beta^*) \sum_{l=1}^L \sum_{b' \in \mathcal{B}^o} A_{b,l,b'} k_{l,b'} + \beta^* \sum_{l,l'=1}^L \sum_{b',b'' \in \mathcal{B}^o} B_{b,l,l',b',b''} k_{l,b'} k_{l',b''} \right)_{b \in \tilde{\mathcal{B}}} \quad (57)$$

where  $\mathcal{B}^o = \mathcal{B} \cup \{\emptyset\}$  and  $k_{l,b}$  is 1 if  $k_l = b$  and 0 otherwise. The AR model thus takes the form of a multi-output logistic regression, with  $\beta^*$  controlling the contribution of the pairwise interaction terms. In each independent simulation, rows of the matrix  $A$  were sampled following,

$$(A_{b,l,b'})_{b \neq \emptyset} \sim (5/L)(\text{Categorical}), \quad A_{\emptyset,l,b'} = -1.5/L.$$

for each  $l, b'$ , where (Categorical) denotes a one-hot encoded sample from a Categorical distribution with uniform probabilities. The matrix  $B$  was generated similarly,

$$(B_{b,l,l',b',b''})_{b \neq \emptyset} \sim (5/L^2)(\text{Categorical}), \quad B_{\emptyset,l,l',b',b''} = -1.5/L^2.$$

for each  $l, l', b', b''$ . Simulations were repeated five times for each  $\beta^*$  value. We set  $L = 5$ .

We then fit AR and BEAR models that lack the pairwise terms. In particular, we optimized  $A$  alone, setting  $B = 0$ , i.e.  $\theta = (A, 0)$ . For the AR models, we trained  $\theta$  using maximum likelihood, and for the BEAR models, we trained the  $h, \theta$  hyperparameters using empirical Bayes. In both cases, we trained without mini-batching, using 1000 steps of the Adam optimizer with a training rate of 0.05 [37].

To approximate the KL divergence and total variation distance between the models and the data, 2,000 independent sequences were sampled from the data-generating distribution  $p^*$  and used to calculate averages of  $\log(p^*(X)/p(X))$  and  $\frac{1}{2}|1 - p(X)/p^*(X)|$  respectively, where  $p$  is either the maximum likelihood estimator (for the AR models) or the posterior predictive (for the BEAR models, estimated using the maximum *a posteriori* value). (Note that the total variation distance is equal to half the  $L^1$  distance since the set of sequences is countable.)

The parameter  $A$  is not identifiable, so to compare between the value of  $A$  inferred by the models and the true data-generating value, we transformed  $A$  to a canonical representation. Define  $\tilde{A}_{b,l,b'} = A_{b,l,b'} - A_{\emptyset,l,b'}$  and define the canonical representation

$$A_{b,l,b'}^{\text{can}} = \tilde{A}_{b,l,b'} - \frac{1}{|\mathcal{B}^o|} \left( \sum_{b''} \tilde{A}_{b,l,b''} - \frac{1}{L} \sum_{l',b''} \tilde{A}_{b,l',b''} \right).$$

**Proposition 36.** *Two linear AR matrices  $A, A'$  define the same linear AR model of lag  $L$  if and only if  $A^{\text{can}} = A'^{\text{can}}$ .*

*Proof.* Define the vector space

$$V = \{v \in \mathbb{R}^{L \times \mathcal{B}^o} \mid \forall i, j, \sum_{b'} v_{i,b'} = \sum_{b'} v_{j,b'}\}.$$

One hot encodings of sequences of length  $L$  are contained in  $V$ . As well, it can be seen that  $V$  is spanned by the vectors  $(e_{i,b} - e_{i,b'})_{1 \leq i \leq L, b \neq b' \in \mathcal{B}^o}$  (where  $e_{i,b}$  is the indicator of position  $i, b$ ) and the vector consisting of ones in each entry. This basis of  $V$  is made up of linear combinations of one hot encodings of sequences of length  $L$  and thus the span of one hot encodings of sequences of length  $L$  is  $V$ . The orthogonal complement of  $V$  is spanned by  $(e_i - e_1)_{1 < i \leq L}$  where  $e_i$  is 1 at position  $j, b$  if  $j = i$  and 0 otherwise. The transformation

$$v \mapsto \left( v_{i,b} - \frac{1}{|\mathcal{B}^o|} \left( \sum_{b''} v_{i,b''} - \frac{1}{L} \sum_{i',b''} v_{i',b''} \right) \right)_{1 \leq i \leq L, b \neq b' \in \mathcal{B}^o}$$

preserves  $V$  and annihilates the orthogonal complement of  $V$  and is thus the orthogonal projection onto  $V$ ,  $P_V$ .

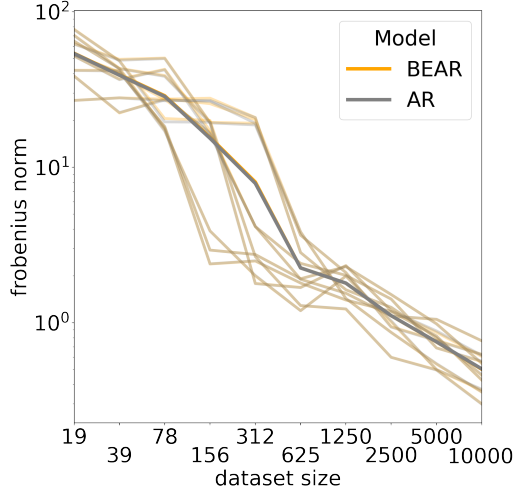

Figure S7: Frobenius norm between the canonical representation (Section I.1) of the AR model parameters  $\theta$  inferred by fitting an AR model with maximum likelihood and those inferred by fitting the BEAR model with empirical Bayes, in the well-specified ( $\beta^* = 0$ ) case. Thick lines show the average across five independent simulations (small lines). Note that the differences between the two models are indistinguishable relative to the variation across datasets and the variation as dataset size increases.

Thanks to the softmax in Equation 57, two linear AR matrices  $A$  and  $A'$  define the same linear AR model if there is a constant  $C$  such that for all sequences  $k$  of length  $L$  and  $b \in \tilde{\mathcal{B}}$ ,

$$\sum_{l=1}^L \sum_{b' \in \mathcal{B}^o} A_{b,l,b'} k_{l,b'} = \sum_{l=1}^L \sum_{b' \in \mathcal{B}^o} A'_{b,l,b'} k_{l,b'} + C.$$

This is equivalent to the condition

$$\sum_{l=1}^L \sum_{b' \in \mathcal{B}^o} \tilde{A}_{b,l,b'} k_{l,b'} = \sum_{l=1}^L \sum_{b' \in \mathcal{B}^o} \tilde{A}'_{b,l,b'} k_{l,b'}$$

for all  $k, b$  and thus to the condition

$$P_V \tilde{A}_b = P_V \tilde{A}'_b$$

for all  $b$ . □

### I.1.2 Results

We first fixed  $L$  at the same value as the simulation data, to study the effect of the structured prior in the BEAR model. Figure 2A shows the convergence in KL of each model as the dataset size increases, and Figure S8 the convergence in total variation distance. Figure 2B shows the convergence of the hyperparameter  $h$  in the BEAR model. In Figure S7, we compare the parameter  $A$  inferred with the AR model to the true data-generating value using the Frobenius norm of the canonical representation of each; likewise for the parameter  $A$  inferred with the BEAR model. In this well-specified case, we see that the BEAR model parameter estimate converges just as quickly as the AR model.

Next we considered inference of  $L$ . We simulated data from models with different  $L$  values ( $L \in \{3, 4, 5\}$ ) and  $\beta^* = 0$ . We computed the expected value of  $L$  under the posterior with a uniform prior on lags from 1 to 8. Figure S9 shows that the inferred lag converges to the true data-generating value.

## I.2 Infinite lag models

This subsection describes experiments conducted to study the infinite lag (nonparametric) consistency results of Section H in practice.

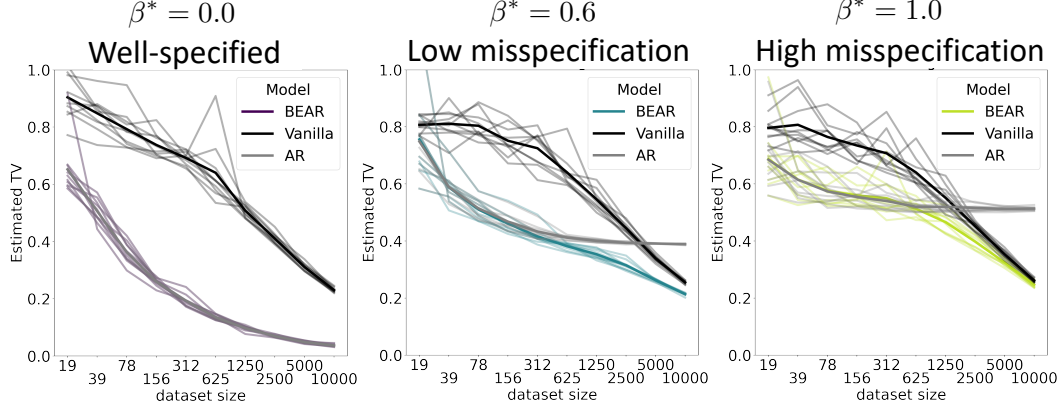

Figure S8: As in Figure 2A, except using the total variation distance in place of the KL norm.

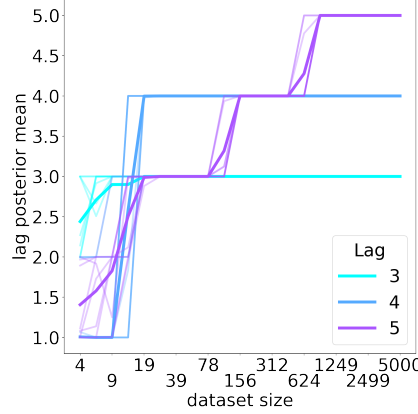

Figure S9: Mean of the BEAR model posterior over lags, as a function of dataset size. Thick lines show the average across five independent simulations (thin lines).

### I.2.1 Setup

To generate from a distribution that was not a finite lag AR model, we chose the first letter in each sequence  $X$  uniformly from the alphabet  $\mathcal{B}$ , then sampled the rest of the sequence following,

$$p(X_i = b | X_1, \dots, X_{i-1}) \propto \sum_{l=1}^{i-1} l^{-2} \sum_{b' \in \mathcal{B}^o} A_{b,l,b'} X_{i-l,b'}.$$

In each independent simulation, the parameter  $A$  was sampled as  $A_{b,l,b'} \sim \text{Bernoulli}(0.2)$  for each  $l, b$  and  $b' \neq \$$ , and as  $A_{b,l,b'} \sim (0.2)(\text{Bernoulli}(0.2))$  for each  $l, b$  and  $b' = \$$ .

Following Section H.3.3, we set  $\nu_m = 0$  and used the prior on lags  $\pi(L) \propto \exp(-4^{(1+c)L})$ . We used a Jeffreys prior ( $\alpha_{k,b} = 1/2$  for all  $k, b$ ) and took the maximum *a posteriori* value of  $L$  and  $v$ . We also considered the maximum likelihood estimator of  $L$  (i.e. with the prior dropped). To approximate the KL divergence and the total variation distance, we used 30,000 samples; the training procedure was otherwise the same as in Section I.1

### I.2.2 Results

We examined the convergence of the posterior predictive distribution of the BEAR model for different values of the prior hyperparameter  $c$ . In all cases we see convergence to  $p^*$  in both total variation and KL (Figure S10AB). Decreasing  $c$  produces a longer-tailed prior, making the maximum *a posteriori* value of  $L$  diverge more quickly with dataset size (Figure S10C).

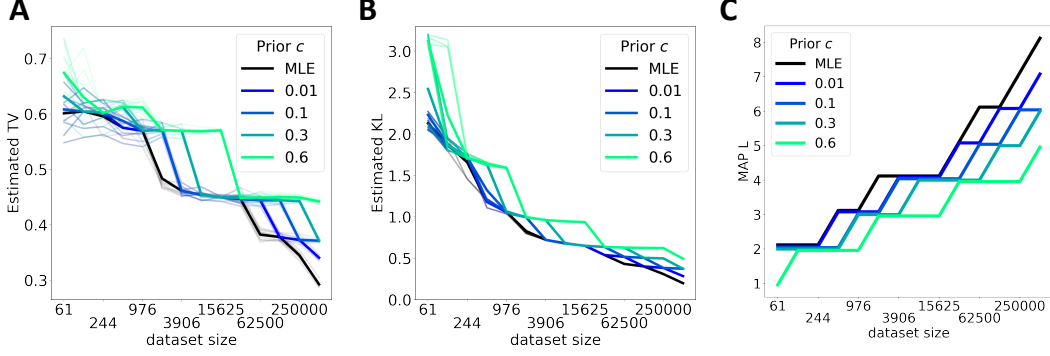

Figure S10: Convergence in total variation (A) and KL (B) between data-generating distribution and model. Thick lines indicate averages across five individual simulations (thin lines). (C) Maximum *a posteriori* estimator of the lag  $L$  in an individual example simulation.

In this example, decreasing  $c$  yields faster convergence to  $p^*$ . Using the maximum likelihood value of  $L$  (equivalent to an improper uniform prior) yields even faster convergence to  $p^*$ . As discussed in Section H.3.3, lower  $c$  corresponds to larger  $c_2$ , and so is expected to yield lower posterior variance but larger bias; in this simulation, the reduction in bias clearly contributes more to accurate density estimation. This may be because the data-generating distribution is close enough to a finite-lag Markov model that the asymptotics of the BEAR model behave similarly to the finite-lag case.

### I.3 Hypothesis testing

This subsection describes experiments conducted to study the hypothesis testing consistency results of Section G in practice.

#### I.3.1 Setup

We used the same setup as in Section I.1.1, including the same training and divergence estimation procedures, and sampled datasets from a linear AR model with different values of  $\beta^*$ .

In the goodness-of-fit test, we set  $\tilde{p}$  (the model we aimed to test) to a linear AR model with the true, data-generating value of the parameter  $A$  but  $\beta^* = 0$ . We embedded the same linear model, with the same value of  $A$  and  $\beta^*$ , in the BEAR model to compute a Bayes factor. Here we set  $h = 10^{-3}$ , and fixed  $L$  at the data-generating value,  $L = 5$ .

In the two-sample test, instead of comparing to  $\tilde{p}$  directly, we compared to samples drawn from  $\tilde{p}$ . Here we used a Jeffreys prior rather than embed a more complex AR model. We explored both fixing  $L = 5$  and using a truncated uniform prior  $\pi(L) = 1/8$  for  $L$  from 1 to 8 (to evaluate both forms of the consistency results in Section G).

#### I.3.2 Results

We first examined the consistency of the goodness-of-fit test, using the Bayes factor  $\text{BF} = p((X_n)_{n=1}^N)/\tilde{p}((X_n)_{n=1}^N)$  which compares the probability of the data under the BEAR model to the probability under the model of interest  $\tilde{p}$ . Figure S11A shows the Bayes factor diverge to  $+\infty$  when the data does not match the model ( $\beta^* > 0$ ), but diverge to  $-\infty$  when the data does match the model ( $\beta^* = 0$ ). We also explored the Bayes factor as function of  $h$ , holding the amount of data fixed at  $N = 2500$  (Figure S11B). In the limit  $h \rightarrow 0$ , the BEAR model reduces to its embedded AR model  $\tilde{p}$ , and so the Bayes factor converges to 0. On the other hand, in the limit  $h \rightarrow \infty$ , the BEAR model becomes diffuse and the Bayes factor diverges to negative infinity (accepting the null hypothesis). Intermediate values of  $h$  in effect “center” the test at the model  $\tilde{p}$  we aim to evaluate, increasing its power to detect differences between the data and the model G.



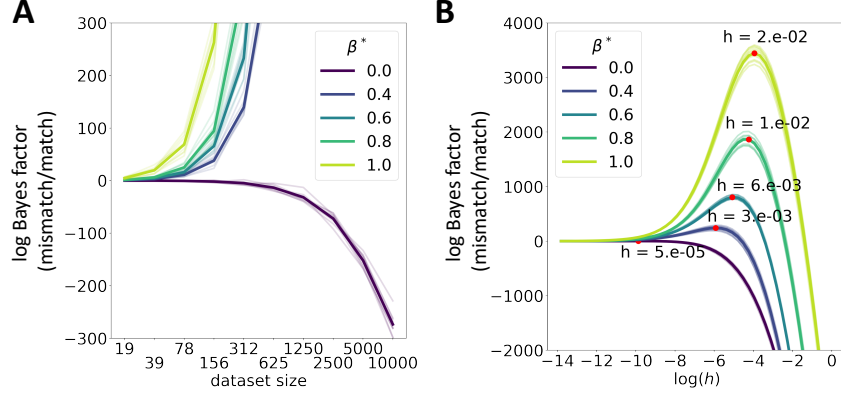

Figure S11: (A) Log Bayes factor for the BEAR goodness-of-fit test. (B) Log Bayes factor as a function of the hyperparameter  $h$ , with peaks identified by red points. In both subfigures, thick lines are averages across five simulations (thin lines).

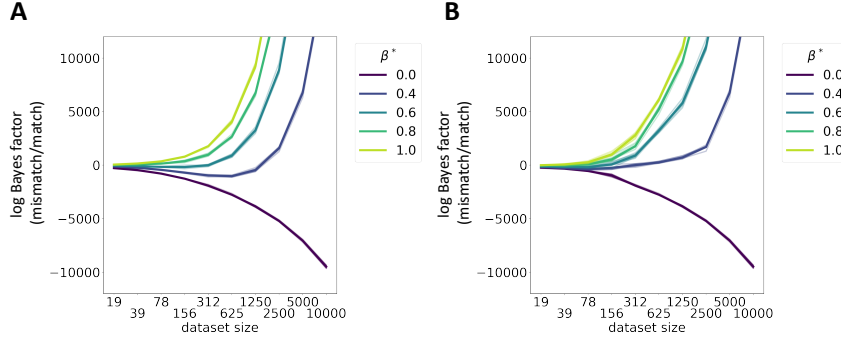

Figure S12: (A) Log Bayes factor for the BEAR two-sample test, using fixed  $L$ . (B) Log Bayes factor for the BEAR two-sample test, marginalizing over a truncated prior on  $L$ . In both subfigures, thick lines are averages across five simulations (thin lines). Dataset size is the size of each individual dataset that the two-sample test compares, not their pooled size.

We next examined the consistency of the two-sample test, using the Bayes factor  $BF = p((X_n)_{n=1}^N)p((X'_n)_{n=1}^{N'})/p((X_n)_{n=1}^N, (X'_n)_{n=1}^{N'})$ , which compares the probability of the two samples being drawn from separate distributions to the probability of their being drawn from the same distribution. Both when using the Bayes factor computed with fixed lag  $L = 5$ , and when using the Bayes factor computed by marginalizing over a truncated uniform prior on  $L$ , we find consistency, with the Bayes factor diverging to  $+\infty$  when  $\beta^* > 0$  and to  $-\infty$  when  $\beta^* = 0$  (Figure S12).

## J Scalable inference

In this section we describe how BEAR models were trained at large scale on real data.

### J.1 Stochastic gradient estimates

Let  $S$  be a set of length  $L$  kmers  $k$  in  $\hat{\mathcal{B}}_L$  chosen uniformly at random (a minibatch). Then, we can form an unbiased stochastic gradient estimate of the marginal likelihood as

$$\nabla_{h,\theta} \log p(X_{1:n}|L, h, \theta) \approx \frac{|\hat{\mathcal{B}}_L|}{|S|} \sum_{k \in S} \nabla_{h,\theta} \log \left[ \frac{\Gamma(\sum_b \frac{1}{h} f_{kb}(\theta)) \prod_b \Gamma(\frac{1}{h} f_{kb}(\theta) + \#(k, b))}{\prod_b \Gamma(\frac{1}{h} f_{kb}(\theta)) \Gamma(\sum_b \frac{1}{h} f_{kb}(\theta) + \#(k, b))} \right].$$

Note also that it is straightforward to parallelize the training algorithm by sending individual minibatches to individual processors at each step, then compiling the results.

Table S1: **Dataset sizes** In nucleotides (nt). Dataset abbreviations as in Table [1](#)

| Dataset         | Total nt       | Max. sequence length (nt) |
|-----------------|----------------|---------------------------|
| YSD1            | 151,691,700    | 150                       |
| <i>A. th.</i> 1 | 3,238,613,507  | 100                       |
| <i>A. th.</i> 2 | 2,485,960,312  | 100                       |
| <i>A. th.</i> 3 | 6,831,756,793  | 100                       |
| PBMC            | 34,935,800,234 | 91                        |
| HL              | 24,185,778,348 | 91                        |
| GBM             | 21,506,001,361 | 65                        |
| HC              | 2,283,930,547  | 202                       |
| CD              | 1,052,405,190  | 202                       |
| UC              | 956,179,237    | 202                       |
| Bact.           | 1,388,421,381  | 6,358,077                 |

## J.2 Extracting summary statistics

KMC counts kmers in large sequence datasets, outputting a list of kmers  $k$  and counts  $\#k$  that is typically too large to fit in memory. However, our inference procedure requires full count vectors  $\#(k, \cdot)$ . We take advantage of the lexicographical ordering of KMC’s output to merge kmer counts into count vectors in a (single pass) streaming algorithm. We also take advantage of the lexicographical ordering to construct count vectors  $\#(k, \cdot)$  for all lags  $L$  given just KMC’s output for the largest lag  $L$ , thus reducing the number of times KMC needs to be run; this too is done using a single pass streaming algorithm. In order to quickly evaluate models by heldout marginal likelihood, it is convenient to store together the counts  $\#(k, \cdot)$  associated with both the training and testing datasets. We accomplish this by merging the KMC output for different datasets as part of the same single pass streaming algorithm. This dataset merging is also useful in training the reference-based models proposed in Section [L.1](#) and we merge reference genome counts with sequencing dataset counts in the same way.

## J.3 Code availability

Code for implementing BEAR models and documentation (including a tutorial for getting started and reproducing basic results) are available at <https://github.com/debbiemarkslab/BEAR>; the code is available under an MIT license. The models are implemented using TensorFlow and TensorFlow Probability, available under an Apache License [\[2\]](#) [\[15\]](#). The code also uses NumPy [\[28\]](#), SciPy [\[77\]](#), and BioPython [\[10\]](#) (all BSD 3-Clause licenses). KMC is available under a GNU GPL 3 license.

# K Datasets

Here we briefly describe each data type and dataset used in evaluating BEAR models, along with some motivation for each. NCBI accession numbers and links for each dataset can be found in the supplementary table Datasets.xlsx. Dataset sizes are listed in Table [S1](#). All data is publicly available for research use. Patient data was anonymized by the creators of each dataset, and further details on ethical oversight and patient consent can be found in the cited links and papers.

## K.1 Whole genome sequencing

Whole genome sequencing is a standard technique for measuring genome sequences. It is often the starting point for running a genome assembly algorithm or variant caller, which aims to infer (non-probabilistically) the underlying genome from the read data. Directly modeling sequencing reads can be interesting, however, since (a) there are typically portions

of the genome that are difficult to reliably assemble, such as centromeres and telomeres, (b) there may not be enough data to reliably detect variants via standard variant callers or assembly, and (c) although the experiment may be directed towards a particular organism’s genome other DNA may still be present.

- **YSD1** This is a bacteriophage found in the waterways of the United Kingdom which infects *Salmonella*. It was chosen as an example of a relatively small genome sequencing experiment (phage genomes are short). The sequencing experiment was reported in Dunstan et al. [18].
- **A. th.** *Arabidopsis thaliana* is a small flowering plant, used as a model organism in plant research. Structural variants are extremely complicated in plants, making traditional variant-calling methods challenging, and kmer-based analysis approaches are of considerable ongoing interest in the literature (see e.g. Voichek and Weigel [78]). The datasets are from the 1001 Genomes Consortium, <https://1001genomes.org/> [1].

## K.2 Single cell RNA sequencing

Single cell RNA sequencing is an increasingly ubiquitous technique for characterizing the transcriptional state of cells. It is used to discover new cell types, track development and disease, as a readout in cellular engineering efforts, and more. Most analysis techniques coarse-grain the data by just counting transcripts or isoforms. Statistical modeling of reads at the nucleotide level may lead to new insight into the joint distribution of sequences and their expression levels, accounting for such phenomena as somatic variation and RNA editing. Single cell RNA sequencing is increasingly used as a method for understanding tumors and their microenvironment; cancer involves both genome mutations as well as transcriptional changes.

- **PBMC** Samples of peripheral blood mononuclear cells are easy to collect from humans, making this a standard type of single cell RNA sequencing dataset. These cells were taken from a healthy donor. The dataset is from 10x Genomics, using its v3 technology.
- **HL** These cells come from a human dissociated lymph node tumor, from a 19-year-old male Hodgkin’s lymphoma patient. The dataset is from 10x Genomics, using its v3 technology.
- **GBM** These cells were taken from a patient with glioblastoma, the most common primary brain cancer in adults, and include both tumor and peripheral cells. The dataset was reported in [13] and uses a distinct technology from 10x Genomics methods.

## K.3 Metagenomics

Metagenomics is an increasingly ubiquitous technique for characterizing microbiomes, including human and environmental microbiomes. Analysis often proceeds by local assembly, annotation of genes or taxa, etc. Statistical modeling of reads at the nucleotide level avoids this coarse graining and can enable detection and analysis of changes in the microbiome outside known genomic elements.

All three of the metagenomics datasets analyzed in the prediction experiments are from [44], a study of inflammatory bowel disease (IBD) as part of the Integrative Human Microbiome Project, and were taken from stool samples. IBD affects more than 3.5 million people worldwide.

- **HC** This dataset was collected from a control patient without IBD.
- **CD** This dataset was collected from a patient with Crohn’s disease, a form of IBD involving relapsing and remitting inflammation of the gastrointestinal tract.
- **UC** This dataset was collected from a patient with ulcerative colitis, a form of IBD involving relapsing and remitting inflammation of the colon.

We also examined metagenomics datasets from a study of kidney transplants [64]. Viral transmission from donor to recipient has been associated with complications and increases the risk of allograft failure. Schreiber et al. [64] performed metagenomic sequencing on patient urine samples before and after transplant to assess viral transmission. Further description of this dataset can be found in Section O.

#### K.4 Full assembled genomes

Comparisons between distant species are challenging due to complex and large scale genomic changes over evolutionary time. However, generative probabilistic models of protein sequences separated by billions of years of evolution has yielded direct insight into their functional constraints, as well as improved understanding of the large scale evolution of life on earth [31, 60]. As a first step towards extending these ideas to whole genomes, we analyzed diverse bacterial genomes from across the tree of life.

- **Bact.** We examined reference bacterial genomes available in RefSeq [52]. Genomes were selected to be taxonomically diverse, representing different genera and families from across the kingdom of Bacteria; the NCBI accessions are listed in Datasets.xlsx.

## L Prediction experiments details

Here we provide details on the results reported in the **Predicting sequences** and **Measuring misspecification** subsections of the results (Section 6).

### L.1 Model architectures

- **Linear** The linear model is the same as that used in the toy experiments,

$$f_k(A) = \text{softmax} \left( \sum_{l=1}^L \sum_{b' \in \mathcal{B}^o} A_{b,l,b'} k_{l,b'} \right)_{b \in \tilde{\mathcal{B}}} . \quad (58)$$

- **CNN** We use a four layer convolutional neural network with the architecture: input  $\mapsto$  convolution  $\mapsto$  elu  $\mapsto$  elu  $\mapsto$  softmax  $\mapsto$  output, where the convolution is one-dimensional and the elu layers are exponential linear units. Layer normalization was used before each of the elu nonlinearities [4]. Exact details on the model architecture can be found in the supplementary code (Section J.3, function `make_ar_func_cnn` in `ar_funcs.py`).
- **Reference-based** Biologists often make use of a reference genome – a canonical example sequence that is intended to be representative of a species – in analyzing genome sequencing data; reference transcriptomes are used similarly in RNA sequencing analysis, etc.. Reads are aligned to the reference in order to infer the portion of the underlying genome or transcriptome that the read originated from. We built on this basic idea to design an AR model that uses a reference sequence to make predictions. In particular, let  $\#_{\text{ref}}(k, b)$  denote the number of times the length  $L + 1$  kmer  $(k, b)$  occurs in the reference sequence(s). One way to form a prediction is by normalizing these counts for each lag, i.e.  $f_{k,b} = \#_{\text{ref}}(k, b) / \sum_{b'} \#_{\text{ref}}(k, b')$ . We go a step further by (1) accounting for possible mutational or sequencing noise using a Jukes-Cantor mutation model, and (2) accounting for short reads by learning the stop symbol probability. Our complete model is

$$f_{k,b}(\nu, \tau) = (1 - \nu) \left[ e^{-\tau} \frac{\#_{\text{ref}}(k, b)}{\sum_{b' \neq \$} \#_{\text{ref}}(k, b')} + (1 - e^{-\tau}) \frac{1}{|\mathcal{B}|} \right] + \nu \mathbb{I}(b = \$) \quad (59)$$

where  $\tau \in [0, \infty)$  is the (scalar) Jukes-Cantor time parameter,  $\nu \in [0, 1]$ , and  $\mathbb{I}(\cdot)$  is the indicator function that takes value 1 when the expression is true and 0 otherwise. The reference sequences for each dataset are listed in the supplementary table Datasets.xlsx. In analyzing human single cell RNAseq data we pooled multiple reference transcriptomes. We included the reverse complement of each sequence as well as the original sequence when constructing the reference kmer transition counts.

Table S2: **Training parameters** Train-test splits and Adam optimization parameters. Dataset abbreviations as in Table 1. Accum. steps stands for accumulation steps, the number of steps gradients were accumulated over. Paired end reads were treated as separate and split into train and test sets independently.

| Dataset         | Train/test split   | Epochs | Learning rate | Accum. steps |
|-----------------|--------------------|--------|---------------|--------------|
| YSD1            | 3:1 on reads       | 500    | 0.01          | 10           |
| <i>A. th.</i> 1 | 3:1 on reads       | 15     | 0.02          | 100          |
| <i>A. th.</i> 2 | 3:1 on reads       | 15     | 0.02          | 100          |
| <i>A. th.</i> 3 | 3:1 on reads       | 3      | 0.02          | 100          |
| PBMC            | 3:1 on reads       | 3      | 0.02          | 100          |
| HL              | 3:1 on reads       | 5      | 0.02          | 100          |
| GBM             | 55:23 on cells     | 4      | 0.02          | 100          |
| HC              | 3:1 on reads       | 10     | 0.02          | 100          |
| CD              | 3:1 on reads       | 10     | 0.02          | 100          |
| UC              | 3:1 on reads       | 10     | 0.02          | 100          |
| Bact.           | 500:166 on genomes | 2000   | 0.01          | 1            |

## L.2 Training

The maximum marginal likelihood lag  $L$  was chosen for the vanilla BEAR model (with prior concentration parameter  $\alpha_{k,b} = 0.5$  for all  $k, b$ ). We found in general that the posterior under a uniform prior on lags was strongly peaked at a particular lag (Figure S15). All other models (both BEAR and AR) were run with this same lag (that is, we did not integrate over all lags in the BEAR model). Using a fixed lag  $L$  as a comparison point provides a controlled study of the effects of switching from an AR model of transition probabilities to the BEAR model’s AR-structured prior, and choosing  $L$  based on the vanilla BEAR model ensures that the comparison to the vanilla BEAR model is conservative.

The kmer count summary statistics were shuffled once before training (in chunks, due to the large size dataset size), and visited in the same order across epochs. Training was initialized only once; preliminary experiments suggested that training was robust to changes in the random seed. Gradient updates were computed in parallel across two GPUs, at double precision. The minibatch size was 250,000. Gradients were accumulated across minibatches to reduce variance (that is, the gradients from multiple minibatches were added together), and optimization was performed using Adam [37]. Models were trained to convergence. Detailed training hyperparameters are displayed in Table S2. The CNN models used 30 filters of width 8, except in the case of YSD1 where the filter width was reduced to 5 (for both BEAR and AR models); other neural network architecture hyperparameters are given in the supplementary code (function `make_ar_func_cnn` in `ar_funcs.py`). Experiments were run on an internal cluster (Tesla K80, Tesla M40 and Tesla V100 GPUs).

## L.3 Evaluation

Accuracy was evaluated based on the maximum likelihood prediction (in the case of AR models) and the maximum *a posteriori* prediction (in the case of BEAR models). Ties in prediction probabilities were resolved uniformly at random.

The perplexity was calculated based on the heldout test dataset as

$$\exp \left[ -\frac{\log p((X_n)_{n=1}^{N_{\text{test}}})}{\sum_{n=1}^{N_{\text{test}}} |X_n|} \right] \quad (60)$$

where  $p((X_n)_{n=1}^{N_{\text{test}}})$  is the probability of the heldout data conditional on the maximum likelihood parameter value (in the case of AR models) or the marginal probability of the heldout data under the posterior predictive distribution (in the case of BEAR models).

Table S3: **Predictive accuracy.** *Whole genome sequencing data* YSD1: A Salmonella phage. *A. th.*: *Arabidopsis thaliana*, a plant (datasets represent different individuals). *Single cell RNA sequencing data* PBMC: peripheral blood mononuclear cells, taken from a healthy donor. HL: Hodgkin’s lymphoma tumor cells. GBM: glioblastoma tumor cells. *Metagenomic sequencing data* HC: healthy (non-CD and non-UC) controls. CD: Crohn’s disease. UC: ulcerative colitis. *Full assembled genomes* Bact.: Bacteria. *Models* Van: Vanilla (constant). Lin: Linear. CNN: convolutional neural network. Ref: reference genome/transcriptome model (only applicable to datasets with a reference).

| Dataset         | AR Lin. | AR CNN | AR Ref. | BEAR Van. | BEAR Lin.     | BEAR CNN      | BEAR Ref.     |
|-----------------|---------|--------|---------|-----------|---------------|---------------|---------------|
| YSD1            | 33.73%  | 35.86% | 90.8%   | 94.69%    | <b>94.75%</b> | <b>94.75%</b> | 94.71%        |
| <i>A. th.</i> 1 | 35.47%  | 35.59% | 53.81%  | 86.03%    | 86.32%        | 86.34%        | <b>86.50%</b> |
| <i>A. th.</i> 2 | 35.32%  | 35.61% | 70.41%  | 85.36%    | 85.71%        | <b>85.77%</b> | 85.66%        |
| <i>A. th.</i> 3 | 34.94%  | 35.41% | 60.94%  | 76.46%    | 78.51%        | <b>78.52%</b> | 77.13%        |
| PBMC            | 34.36%  | 34.76% | 67.39%  | 87.83%    | <b>88.16%</b> | <b>88.16%</b> | 87.99%        |
| HL              | 34.67%  | 35.59% | 67.17%  | 87.68%    | <b>87.96%</b> | <b>87.96%</b> | 87.82%        |
| GBM             | 30.71%  | 30.9%  | 61.3%   | 78.99%    | 80.44%        | 80.42%        | <b>81.43%</b> |
| HC              | 32.98%  | 33.54% | –       | 83.86%    | 85.03%        | <b>85.06%</b> | –             |
| CD              | 32.13%  | 32.32% | –       | 81.72%    | 83.30%        | <b>83.32%</b> | –             |
| UC              | 32.27%  | 32.23% | –       | 82.71%    | 84.26%        | <b>84.27%</b> | –             |
| Bact.           | 33.89%  | 34.78% | -       | 35.27%    | <b>35.28%</b> | <b>35.28%</b> | -             |

#### L.4 Further performance results

The maximum marginal likelihood lag  $L$  (under the vanilla BEAR model) for each dataset is reported in [S4](#). Interestingly, the optimal lags are intermediate between the large kmer lengths (e.g. more than 30) often used for non-probabilistic assembly algorithms (e.g. [68](#)) and the small kmer lengths (e.g. less than 10) often used as features in clustering or classification algorithms (e.g. [3](#)). The marginal likelihood was in general strongly peaked at a particular value (Figure [S15](#)). Increasing the lag generally led to slightly better performance in terms of both perplexity and accuracy for the non-vanilla BEAR models and the AR models, but (unsurprisingly) worse performance for the vanilla BEAR model; the increases in AR model performance were far from enough to make up the difference with BEAR models (Table [S5](#)).

Plots of training loss versus wall clock time for an AR model and the corresponding BEAR model (with the same fixed lag  $L$ ) are shown in Figure [S13](#); the loss for each is normalized by the minimum and maximum values to be comparable (the BEAR model substantially outperforms the AR model). The BEAR model converges at least as fast as the AR model.

To evaluate performance as a function of dataset size, we subsampled reads uniformly at random without replacement from the YSD1 dataset, and retrained the models on the smaller datasets (Figure [S14](#)). The original dataset had  $\sim 1000\times$  coverage of the bacteriophage genome, meaning that on average 1000 reads were observed overlapping each position in the genome. Note that the vanilla BEAR model performance falls off substantially relative to the BEAR model below  $\sim 3\times$  coverage (in the case of the reference model) (Figure [S14BD](#)).

## M Generation details

Here we provide details on the results reported in the **Generating samples** subsection of the results (Section [6](#)).

The CNN BEAR model was trained on the full (combined train/test data) *Arabidopsis thaliana* 1 dataset, with  $L = 17$ , using identical training parameters as in the performance experiments (Table [S2](#)). 50 bases were generated on the end of reads using the maximum *a posteriori* value of  $v$ , and conditional on a stop symbol not occurring, i.e. following the

Table S4: **Maximum marginal likelihood lag  $L$** . Maximum marginal likelihood lag  $L$  for the vanilla BEAR model. Dataset abbreviations as in Table 1.

| Dataset         | $L$ |
|-----------------|-----|
| YSD1            | 13  |
| <i>A. th.</i> 1 | 17  |
| <i>A. th.</i> 2 | 17  |
| <i>A. th.</i> 3 | 18  |
| PBMC            | 18  |
| HL              | 17  |
| GBM             | 17  |
| HC              | 16  |
| CD              | 16  |
| UC              | 16  |
| Bact.           | 9   |

Table S5: **Performance with increasing lag  $L$** . The symbol  $\dagger$  indicates the maximum marginal likelihood lag  $L$  for the vanilla BEAR model. Dataset abbreviations as in Table 1.

| Perplexity |              |         |        |         |              |               |               |              |
|------------|--------------|---------|--------|---------|--------------|---------------|---------------|--------------|
| Dataset    | Lag          | AR Lin. | AR CNN | AR Ref. | BEAR Van.    | BEAR Lin.     | BEAR CNN      | BEAR Ref.    |
| YSD1       | 13 $\dagger$ | 3.953   | 3.873  | 1.266   | 1.165        | <b>1.144</b>  | <b>1.144</b>  | 1.145        |
| YSD1       | 20           | 3.937   | 3.855  | 1.352   | 1.177        | <b>1.138</b>  | <b>1.138</b>  | <b>1.138</b> |
| Bact.      | 9 $\dagger$  | 3.831   | 3.794  | -       | <b>3.774</b> | <b>3.774</b>  | <b>3.774</b>  | -            |
| Bact.      | 12           | 3.807   | 3.772  | -       | 3.776        | 3.741         | <b>3.738</b>  | -            |
| Accuracy   |              |         |        |         |              |               |               |              |
| Dataset    | Lag          | AR Lin. | AR CNN | AR Ref. | BEAR Van.    | BEAR Lin.     | BEAR CNN      | BEAR Ref.    |
| YSD1       | 13 $\dagger$ | 33.73%  | 35.86% | 90.8%   | 94.69%       | <b>94.75%</b> | <b>94.75%</b> | 94.71%       |
| YSD1       | 20           | 34.19%  | 36.3%  | 87.21%  | 94.88%       | 94.97%        | <b>94.98%</b> | 94.91%       |
| Bact.      | 9 $\dagger$  | 33.89%  | 34.78% | -       | 35.27%       | <b>35.28%</b> | <b>35.28%</b> | -            |
| Bact.      | 12           | 34.42%  | 35.13% | -       | 35.54%       | 35.86%        | <b>35.93%</b> | -            |

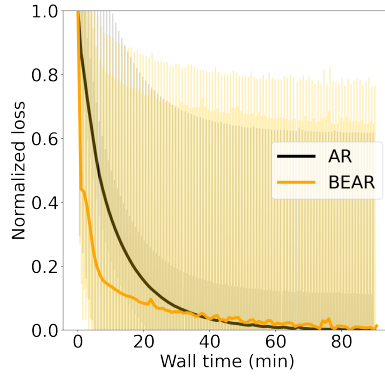

Figure S13: Relative loss (normalized to be between 0 and 1 based on minimum and maximum values) as a function of wall time for a CNN AR model versus the corresponding BEAR model on the YSD1 dataset ( $L = 20$ ).



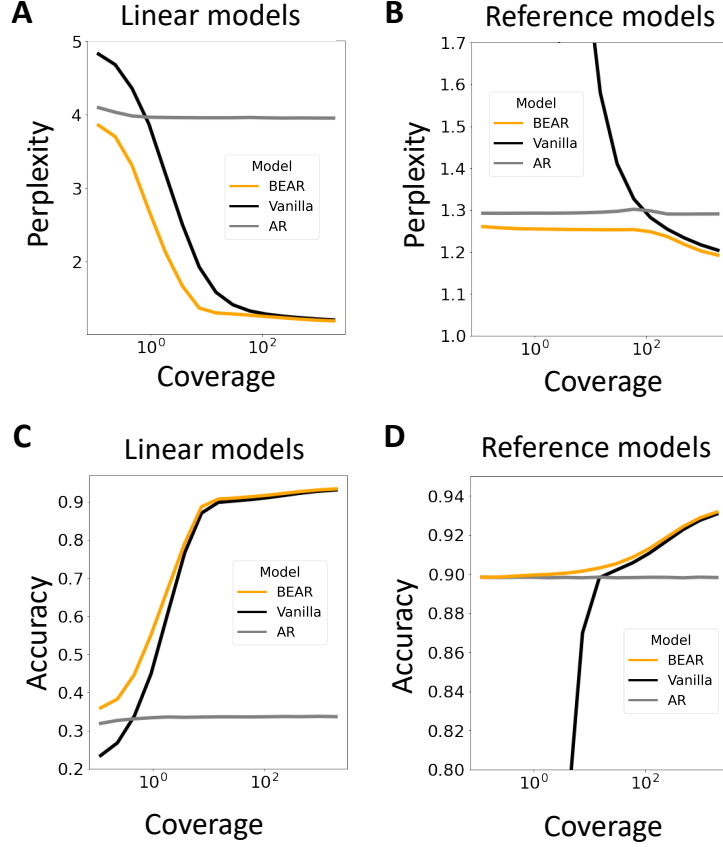

Figure S14: Perplexity (AB) and accuracy (CD) of AR and BEAR models as a function of total dataset size, measured in terms of coverage (coverage is the expected number of reads from each position in the genome; it is linearly proportional to the total number of reads). Subfigures A and C show results for the the linear AR model (and its BEAR embedding), and B and D for the reference-based AR model (and its BEAR embedding). The lag was held fixed in all cases.

distribution

$$p_{\text{extr}}(X_i = b | k = (X_{i-L}, \dots, X_{i-1})) = \frac{f_{k,b}(\theta)/h + \#(k, b)}{\sum_{b' \neq \$} f_{k,b'}(\theta)/h + \#(k, b')} \quad (61)$$

for  $b \neq \$$  and  $p(X_i = \$ | k) = 0$ , where recall  $\#(k, b)$  is the number of times  $b$  is seen succeeding  $k$  in the data, and  $\theta$  and  $h$  are the learned hyperparameters. The values of  $\#(k, b)$  are retrieved from the dataset efficiently using the Jellyfish kmer indexing package [46]. 50 extrapolations each of length 50 were sampled without replacement using the stochastic beam search method proposed by Kool et al. [40].

We performed local assembly using SPAdes, starting from the last 17 bases of the read, and recorded the portion of each scaffold returned by SPAdes that extended in the direction of extrapolation. We used the `--careful` flag in SPAdes, following Voichik and Weigel [78].

The colors in Figure 3A correspond to unique paths through the 17-mer de Bruijn graph. Figure 3B plots the per nucleotide perplexity of the sampled extrapolations, i.e.

$$\exp \left( - \sum_b p_{\text{extr}}(b | k = (X_{n,i-L}, \dots, X_{n,i-1})) \log p_{\text{extr}}(b | k = (X_{n,i-L}, \dots, X_{n,i-1})) \right)$$

where  $n$  indexes the sampled extrapolation and  $i$  the position in the sample.

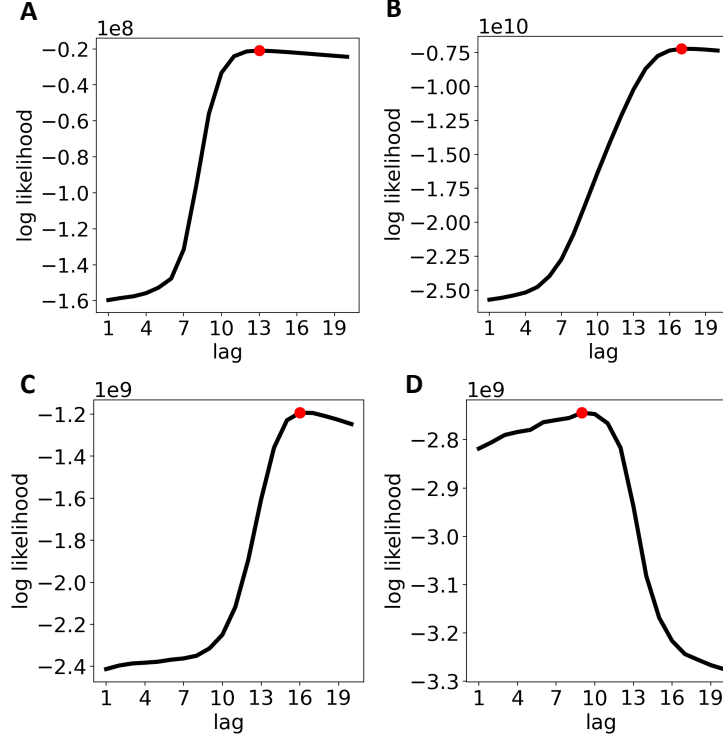

Figure S15: Marginal log likelihood under the vanilla BEAR model as a function of lag  $L$  for the bacteriophage YSD1 (A), glioblastoma GBM (B), control metagenomic HC (C) and bacteria Bact. (D) datasets. Note the large scale (upper left) of each plot.

## N Visualization details

Here we provide details on the results reported in the **Visualizing data** subsection of the results (Section 6).

### N.1 Latent representation model

As a local latent representation model, we used a categorical probabilistic principal component analysis (pPCA) model, with automatic relevance determination [41, 71]. We trained on kmers  $(k_t, b_t)$  of length  $L + 1 = 18$  and used  $D = 20$  latent dimensions. The complete model was,

$$\begin{aligned}
 \kappa_d &\sim \text{Exponential for } d \in \{1, \dots, D\} \\
 W_d &\sim \text{Normal}(0_{L+1, |\mathcal{B}|}, 1/\kappa_d) \text{ for } d \in \{1, \dots, D\} \\
 W_0 &\sim \text{Normal}(0_{L+1, |\mathcal{B}|}, 1) \\
 z_t &\sim \text{Normal}(0_D, 1) \\
 (k_t, b_t) &\sim \text{Categorical}(\text{softmax}(W \cdot z_t + W_0))
 \end{aligned} \tag{62}$$

where  $t \in \{1, \dots, T\}$  runs over all length  $L + 1$  kmers in the dataset,  $0_{L+1, |\mathcal{B}|}$  is an  $(L + 1) \times |\mathcal{B}|$  matrix of zeros, and  $0_D$  is a length  $D$  vector of zeros. Here the local variable  $z_t$  provides a representation associated with the kmer  $(k_t, b_t)$ , the global parameter  $W$  controls the factors of variation, and  $\kappa$  determines the relevance of each factor through the variance of the prior on  $W$ . We trained this latent representation model, and embedded it into a BEAR model, in three stages.

**Stage 1** First, we performed stochastic variational inference to learn the parameters of the model [38, 41, 59]. In particular, we used normally distributed mean field posterior approximations  $q(W)$ ,  $q(z|k, b)$ , and a deterministic approximation to  $\kappa$ , and optimized the

evidence lower bound (ELBO)

$$\mathbb{E}_{W \sim q(W)} \left[ \sum_{k,b} \#(k,b) \left( \mathbb{E}_{z \sim q(z|k,b)} \log p(k,b|W,z) - \text{KL}(q(z|k,b)||p(z)) \right) + \log p(W|\kappa) - \text{KL}(q(W)||p(W)) \right] + \log p(\kappa) \quad (63)$$

where  $\#(k,b)$  denotes the number of kmers  $(k,b)$  seen in the data and the sum runs over all  $k \in \mathcal{B}_L^o$ ,  $b \in \tilde{\mathcal{B}}$ . For the local latent variable  $z$ , we use a guide (recognition network)  $q(z|k,b) = \text{Normal}(\mu(k,b), \sigma(k,b))$  where  $\mu(k,b)$  and  $\sigma(k,b)$  are each small CNNs. Gradients with respect to the variational approximation parameters were taken using automatic differentiation and the reparameterization trick (elliptical standardization), with one sample for the Monte Carlo approximation at each step.

**Stage 2** Once the pPCA model was trained, we approximated its conditional distribution. In particular, we obtained a variational approximation to  $p(z|k, (k_t, b_t)_{t=1}^T)$ , namely  $q(z|k)$ , by optimizing the evidence lower bound

$$\mathbb{E}_{W \sim q(W)} \left[ \sum_k \#k \left( \mathbb{E}_{z \sim q(z|k)} \log p(k|W,z) - \text{KL}(q(z|k)||p(z)) \right) \right]. \quad (64)$$

Note that  $q(W)$  was held fixed, at the value learned in stage 1.  $q(z|k)$  was parameterized analogously to  $q(z|k,b)$ . Now we can approximate the conditional distribution of the pPCA model as

$$p(b|k) \approx \mathbb{E}_{W \sim q(W)} \mathbb{E}_{z \sim q(z|k)} p(b|W,z).$$

This defines an AR model.

**Stage 3** Finally, we embedded the conditional pPCA AR model into a BEAR model and optimized  $h$  via empirical Bayes (note that here we are not using empirical Bayes to train the BEAR model’s embedded AR parameters  $\theta$ , but instead embedding a pretrained AR model). Since the variational distribution  $q(W)$  was highly concentrated at a single point, we used a computationally convenient approximation to the marginal likelihood of the BEAR model, moving the expectation over the global parameters outside the log marginal likelihood:

$$\mathbb{E}_{W \sim q(W)} \left[ \sum_k \log \text{DirichletCategorical} \left( \#(k, \cdot) | \frac{1}{h} \mathbb{E}_{z \sim q(z|k)} p(b|W,z) \right) \right]$$

where  $\text{DirichletCategorical}(\#(k, \cdot) | \alpha_k)$  denotes the probability of the count vector  $\#(k, \cdot)$  under a Dirichlet-Categorical distribution with concentration vector  $\alpha_k$ .

**Training protocol and hyperparameters** The entire variational inference and embedding procedure was implemented using the Edward2 [72] probabilistic programming language with a TensorFlow [2] back-end. We applied the method to the Hodgkin’s lymphoma single cell RNAseq described in section [K] using the same train/test split as for the performance results in Section [L]. Optimization was performed with Adam with a batch size of 125,000. Gradients were accumulated over 200 steps. The three stages of training described above were repeated iteratively four times until each converged. In each iteration, the first two stages were trained for 5 epochs, and we used a decaying learning rate across iterations  $\{0.02, 0.02, 0.01, 0.005\}$ ; the third stage was trained for 100 batches with a constant learning rate of 0.1 across all iterations.

**Inference results** At the end of training, the conditional pPCA AR model had a perplexity of 4.28 on heldout data, while the BEAR model had a perplexity of 1.39.

## N.2 Visualization and annotation

We next sought to understand in greater depth what the BEAR model had learned in the lymphoma dataset.

**Reference model** We first aimed to understand how the model’s predictions differed from predictions based on the reference transcriptome. On the full dataset (combined train/test)

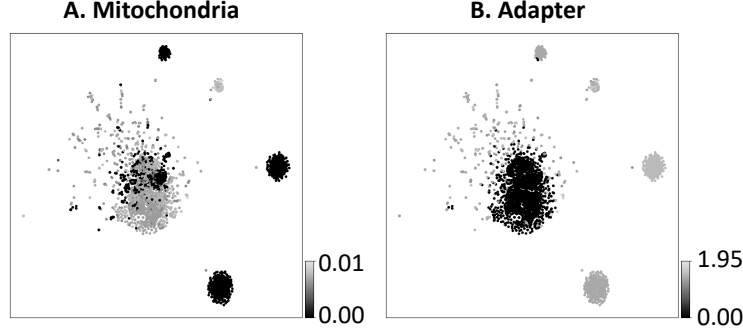

Figure S16: tSNE visualization of a cluster of single cell RNAseq reads colored by (A) latent embedding distance to the mitochondrial reference genome and (B) latent embedding distance from the sequencing adapter.

we compared the log probability of each read under the pPCA BEAR model to the log probability of each read under a vanilla BEAR model trained on the reference transcriptome (Figure 3C; see Datasets.xlsx for details on the reference transcriptome). We found a substantial disparity between the two model’s predictions, with a number of reads having high probability under the BEAR model but low probability according to the reference model.

**Alignments** Single cell RNAseq analysis often begins by aligning reads to the reference transcriptome; reads that do not align are typically discarded from further analysis. We performed alignments on the read dataset with hisat2 [36] using parameters `-reorder -no-hd -n-ceil L,0,0.001 -no-sq -k 1 -p 4` and with the default hisat2 *Homo sapiens* GRCh38 genome index with transcripts and SNPs, available at [https://genome-idx.s3.amazonaws.com/hisat/grch38\\_snptran.tar.gz](https://genome-idx.s3.amazonaws.com/hisat/grch38_snptran.tar.gz). Whether or not each read was successfully aligned is indicated in Figure 3C. We observe that many of the reads with low probability under both the pPCA BEAR model and the reference model are unaligned. We also observed a cluster with a large number of unaligned reads, with high probability under the pPCA BEAR model and relatively low probability under the reference model. We focused on a subset of this cluster with particularly high probabilities under the pPCA BEAR model for follow-up visualization (black box in Figure 3C).

**Visualization** The pPCA model provides a latent embedding of kmers in a  $D = 20$  dimensional continuous space. We sought to visualize the representation of each sequence’s kmers in a low dimensional space. To compare two sequences  $X, X'$ , we defined a measure of dissimilarity,

$$\inf_{i,i'} \text{KL}(q(z|X_{i-L:i})||q(z|X'_{i'-L:i'})) + \text{KL}(q(z|X'_{i'-L:i'})||q(z|X_{i-L:i})).$$

where  $i > L$  and  $i' > L$  index positions in  $X$  and  $X'$  respectively. This dissimilarity measure was used to define a distance matrix over reads in the Hodgkin’s lymphoma dataset, which was passed to tSNE [74] to obtain a low-dimensional visualization (Figure 3D).

**Annotation** Observing the clusters in Figure 3D, we sought to determine where the reads in each cluster likely originated from, and, by implication, what the reference transcriptome model had trouble explaining in the data. We started by using NCBI’s BLAST tool [8] to search for likely sources, and found hits against the mitochondrial genome and the transcript of the gene *JUND*, part of the AP-1 early response transcription factor. We found that the mitochondrial reads are from a nonreference haplotype, which explains why the reference model gave them low probability. The low likelihood of the *JUND* reads under the reference was due to a TG repeat region in the 3’ UTR; similar repeats are present in many variations in different transcripts, thus the particular kmer-base transitions in this case become less likely. We also observed that many reads were chimeric, consisting of fusions of sequences from various parts of the transcriptome with some portion of the sequence CTGTCTCTTATACACATCTCTGAACGGCTGGCAAGGCAGACCG. The prefix CTGTCTCTTATACACATCT is a standard Illumina Nextera adapter sequence <https://support-docs.illumina>

[com/SHARE/AdapterSeq/illumina-adapter-sequences.pdf](https://com/SHARE/AdapterSeq/illumina-adapter-sequences.pdf), and the remainder of the sequence is presumably part of the primer. The adapter is an experimental artifact (presumably left in the read data due to inaccurate read trimming and quality control), and so is not part of the reference human transcriptome.

We used the same dissimilarity measure as above to compare reads to the mitochondria reference genome (Datasets.xlsx) and to the adapter sequence CTGTCTCTTATACACATCTCTGAACGGGCTGGCAAGGCAGACCG (Figure S16). (The distance to each of these sequences was taken to be the minimum of the distance to the forward and reverse complements.) Figure S16, along with the BLAST results for *JUND*, were the basis for the annotations in Figure 3D.

## O Hypothesis tests details

Here we provide details on the results reported in the **Testing hypotheses** subsection of the results (Section 6).

### O.1 Kidney transplant metagenomics

The Schreiber et al. [64] data is available for public download, as detailed in Datasets.xlsx. The read data was pre-sorted into viral and non-viral reads, but we pooled each of these to reconstruct the full sequencing experiment. We compared the day zero timepoint, i.e. before transplant, to the 4-6 week timepoint, i.e. after transplant, for each patient for which samples from both were available (note this did not include all patients in the study). We used the BEAR two-sample test, with the Jeffreys prior on  $v$ , and a truncated uniform prior over lags  $1 \leq L \leq 20$ . We cross referenced our two-sample test results with whether Schreiber et al. [64] determined there to be likely JC polyomavirus (JCPyV) transmission.

The results are shown in Table S6 and suggest that JCPyV transmission is associated with an overall shift in the patient microbiome at the sequence level. Patients indicated with an asterisk were diagnosed as having JCPyV before receiving the transplant, and thus the determination of whether the transplant transmitted JCPyV is less certain; for patient wdk036, phylogenetic analysis suggested that the transplant did transmit JCPyV, while for jns976 phylogenetic analysis suggested that it did not. Although the two-sample test results show close correlation with whether or not there was transmission, we caveat them by noting that for very small lags the Bayes factor rejects the null hypothesis for all patients; the question of the most "biologically relevant" prior on the lag  $L$  is an open question.

### O.2 *A. thaliana* hypothesis tests

**Goodness-of-fit test** We trained reference-based AR models (described in Section L.1) via maximum likelihood on each *A. thaliana* sequencing dataset (the full dataset, with train/test subsets combined). We used  $L = 17$  in the AR model for all three datasets (corresponding the vanilla BEAR maximum marginal likelihood lag for two datasets, see Table S4). We embedded each trained AR model into a BEAR model to construct a goodness-of-fit test (i.e. we used the learned  $f(\theta)$ ). We fixed  $L = 17$  in the BEAR model (i.e. a deterministic prior over  $L$ ) to determine if there was misspecification at the same resolution as the AR model. Figure 3E plots the Bayes factor as a function of  $h$ .

**Two-sample tests** We simulated sequencing reads based on the *A. thaliana* reference genome (Datasets.xlsx) using the ART Illumina [32] simulator with parameters `-ss HS20 -p -l 100 -m 200 -s 10 -f 30`. We simulated roughly the same number of reads as was in each real dataset. We examined the Bayes factor  $\text{BF}(L) = p((X_n)_{n=1}^N | L) p((X'_n)_{n=1}^{N'} | L) / p((X_n)_{n=1}^N, (X'_n)_{n=1}^{N'} | L)$ , computed using vanilla BEAR models for each term (Figure 3F). As control experiments, we cut each dataset (and the simulated data) in half, and compared each of these halves to each other using the same two-sample test; as shown by the dotted lines in Figure 3F, the two-sample test correctly accepts the null hypothesis in these cases.

Table S6: BEAR two-sample test results, performed on patient metagenome samples from before and after kidney transplant. Bayes factors that reject the null hypothesis are colored red, for easy comparison with whether or not JC polyomavirus (JCPyV) transmission was detected. Asterisks \* indicate patients that were already infected with JCPyV before the transplant occurred.

| Patient id | JCPyV transmission | log Bayes factor |
|------------|--------------------|------------------|
| ume111     | True               | 110407           |
| vpi912     | False              | 234361           |
| iwv346     | False              | -955252          |
| pqg516     | False              | -504784          |
| tvv653     | True               | 70223            |
| bgk952     | False              | -357457          |
| wdk036*    | True               | 3152401          |
| jns976*    | False              | -199006          |
| aag951     | True               | 242877           |
| qfv506     | False              | -155391          |
| qnx429     | True               | 369129           |
| poo581     | False              | -290382          |
| xph346     | False              | -254856          |
| mek642     | False              | -348120          |

**Individual log likelihood ratio** To understand in detail the differences between the real and simulated data, we computed the conditional individual Bayes factor  $\log p(X_n | (X_n)_{n=1}^N) - \log p(X_n | (X'_n)_{n=1}^{N'})$  where  $(X_n)_{n=1}^N$  is the real data and  $(X'_n)_{n=1}^{N'}$  the simulated data. We approximated the log likelihood using the maximum *a posteriori* value of the transition parameter  $v$  under the vanilla BEAR model, and fixed  $L = 17$ . Computing this likelihood efficiently for each read requires retrieving counts  $\#(k, \cdot)$  for each kmer  $k$  in the read, which we accomplished using the Jellyfish kmer indexing package [46]. Histograms of the log likelihood ratio of each read  $X_n$  in two of the *A. thaliana* datasets are shown in Figure 3G (gray).

**Annotation** Observing the distinct peaks in Figure 3G, we sought to determine where the reads in each originated from. We discovered that many reads in the outlier peak from *A. thaliana* 1 matched *Bacillus cereus*, using NCBI's BLAST tool [8]. To annotate the clusters further, we aligned the reads to reference sequences for centromeres, chloroplasts, and *B. cereus*, as well as (if the read did not align to one of these) the reference *A. thaliana* genome (reference sequences are listed in Datasets.xlsx). Alignments were performed using `hisat2` on paired end read data using parameters `-reorder -no-hd -n-ceil L,0,0.001 -no-sq -k 1 -p 4` to facilitate subsequent analysis and remove reads with ambiguous bases. The alignment to the centromere included the parameter `-mp 1,1` to allow lower quality alignments. Histograms of the set of reads that align to each reference are shown (stacked on top of one another, not overlaid) in Figure 3G.
